# Supplementary material for: Identification of endogenous retroviral reading frames in the human genome
Source: PubMed Central journal article supplement (PMC524368; doi:10.1186/1742-4690-1-32), 2004-10-11
Supplement: 1742-4690-1-32-S1.pdf [file 1742-4690-1-32-S1.pdf]

## Additional File 1

Table 1. Genes with one or more vORF HERVs inside.

Genes were selected from Ensembl (Current Release 21.34d.1) and compared with all HERV regions containing a retroviral ORF. 813 genes (642 with descriptions) contained 1182 HERVs (969) overlapping the gene chromosomal coordinates (exons + introns). The HERV score is a measure of the density of retroviral blast hits in the region.

| Chr | Ensembl id        | Description                                                                                                                                                                         | Strand   | HERV id | HERV score |
|-----|-------------------|-------------------------------------------------------------------------------------------------------------------------------------------------------------------------------------|----------|---------|------------|
| 1   | ENSG0000000971.3  | "Complement factor H precursor (H factor 1). [Source:SWISSPROT;Acc:P08603]"                                                                                                         | same     | 6119    | 4.95864    |
| 1   |                   |                                                                                                                                                                                     |          | 6120    | 12.9745    |
| 1   | ENSG00000048707.2 | "vacuolar protein sorting 13D. [Source:RefSeq;Acc:NM_015378]"                                                                                                                       | opposite | 6468    | 5.53156    |
| 1   |                   |                                                                                                                                                                                     |          | 6469    | 8.632      |
| 1   | ENSG00000051415.5 | Alpha-amylase                                                                                                                                                                       | same     | 5459    | 21.7604    |
| 1   |                   |                                                                                                                                                                                     | opposite | 7018    | 22.2868    |
| 1   | ENSG00000057468.1 | "MutS protein homolog 4. [Source:SWISSPROT;Acc:O15457]"                                                                                                                             | same     | 5207    | 3.74618    |
| 1   | ENSG00000067208.3 | "EVI-5 homolog. [Source:SPTREMBL;Acc:O60447]"                                                                                                                                       | opposite | 5363    | 4.4899     |
| 1   | ENSG00000075391.4 | "Ras GTPase-activating protein nGAP (RAS protein activator like 1). [Source:SWISSPROT;Acc:Q9UJF2]"                                                                                  | same     | 5846    | 5.08548    |
| 1   |                   |                                                                                                                                                                                     | opposite | 7413    | 13.9851    |
| 1   | ENSG00000078900.2 | "Tumor protein p73 (p53-like transcription factor) (p53-related protein). [Source:SWISSPROT;Acc:O15350]"                                                                            | same     | 4897    | 3.0776     |
| 1   |                   |                                                                                                                                                                                     | opposite | 6449    | 12.333     |
| 1   | ENSG00000116141.5 | "MAP/microtubule affinity-regulating kinase 1. [Source:RefSeq;Acc:NM_018650]"                                                                                                       | opposite | 7796    | 5.5134     |
| 1   | ENSG00000116711.2 | "Cytosolic phospholipase A2 (CPLA2) [Includes: Phospholipase A2 (EC 3.1.1.4) (Phosphatidylcholine 2-acylhydrolase); Lysophospholipase (EC 3.1.1.5)]. [Source:SWISSPROT;Acc:P47712]" | opposite | 7447    | 26.2564    |
| 1   | ENSG00000117020.4 | RAC-gamma serine/threonine protein kinase (EC 2.7.1.-) (RAC-PK-gamma) (Protein kinase Akt-3) (Protein kinase B                                                                      | opposite | 6400    | 1.64645    |
| 1   | ENSG00000117069.3 | Alpha-N-acetylgalactosaminide alpha-2                                                                                                                                               | opposite | 6772    | 7.2391     |
| 1   |                   |                                                                                                                                                                                     |          | 6773    | 14.7155    |
| 1   | ENSG00000117091.1 | "B-lymphocyte activation marker BLAST-1 precursor (BCM1 surface antigen) (Leucocyte antigen MEM-102) (TCT.1) (Antigen CD48). [Source:SWISSPROT;Acc:P09326]"                         | same     | 7300    | 15.0697    |
| 1   |                   |                                                                                                                                                                                     |          | 7301    | 22.0265    |
| 1   |                   |                                                                                                                                                                                     | opposite | 5715    | 22.3467    |
| 1   | ENSG00000117322.5 | "Complement decay-accelerating factor precursor (CD55 antigen). [Source:SWISSPROT;Acc:P08174]"                                                                                      | opposite | 7747    | 2.55454    |
| 1   |                   |                                                                                                                                                                                     |          | 7749    | 16.3125    |
| 1   | ENSG00000117501.3 | (blank)                                                                                                                                                                             | opposite | 7361    | 5.3024     |
| 1   | ENSG00000117528.1 | ATP-binding cassette                                                                                                                                                                | same     | 5371    | 20.8658    |
| 1   | ENSG00000121904.5 | "CUB and sushi multiple domains protein 2. [Source:SWISSPROT;Acc:Q7Z408]"                                                                                                           | opposite | 4986    | 4.51576    |
| 1   | ENSG00000123838.1 | "C4b-binding protein alpha chain precursor (C4bp) (Proline-rich protein) (PRP). [Source:SWISSPROT;Acc:P04003]"                                                                      | opposite | 7743    | 7.05896    |
| 1   |                   |                                                                                                                                                                                     |          | 7744    | 3.58426    |
| 1   | ENSG00000132122.1 | "spermatogenesis associated 6. [Source:RefSeq;Acc:NM_019073]"                                                                                                                       | opposite | 5037    | 13.7339    |
| 1   | ENSG00000132676.2 | "Mitochondrial 28S ribosomal protein S29 (S29mt) (MRP-S29) (Death- associated protein 3) (DAP-3) (Ionizing radiation resistance                                                     | opposite | 7267    | 19.8556    |

| Chr | Ensembl id        | Description                                                                                                                                                                                                                      | Strand   | HERV id | HERV score |
|-----|-------------------|----------------------------------------------------------------------------------------------------------------------------------------------------------------------------------------------------------------------------------|----------|---------|------------|
|     |                   | conferring protein). [Source:SWISSPROT;Acc:P51398]"                                                                                                                                                                              |          |         |            |
| 1   |                   |                                                                                                                                                                                                                                  |          | 7268    | 22.8178    |
| 1   | ENSG00000134250.5 | "Neurogenic locus notch homolog protein 2 precursor (Notch 2) (hN2). [Source:SWISSPROT;Acc:Q04721]"                                                                                                                              | opposite | 5612    | 3.38852    |
| 1   | ENSG00000134263.3 | "Synaptonemal complex protein 1 (SCP-1 protein). [Source:SWISSPROT;Acc:Q15431]"                                                                                                                                                  | opposite | 7132    | 6.20943    |
| 1   | ENSG00000134716.2 | "Cytochrome P450 2J2 (EC 1.14.14.1) (CYPII2) (Arachidonic acid epoxygenase). [Source:SWISSPROT;Acc:P51589]"                                                                                                                      | same     | 6625    | 1.28276    |
| 1   | ENSG00000135747.3 | "Zinc finger protein 124 (HZF-16). [Source:SWISSPROT;Acc:Q15973]"                                                                                                                                                                | opposite | 6419    | 19.177     |
| 1   |                   |                                                                                                                                                                                                                                  |          | 6421    | 11.2121    |
| 1   | ENSG00000137968.3 | (blank)                                                                                                                                                                                                                          | opposite | 5201    | 13.7351    |
| 1   | ENSG00000142623.1 | "Protein-arginine deiminase type I (EC 3.5.3.15) (Peptidylarginine deiminase I). [Source:SWISSPROT;Acc:Q9ULC6]"                                                                                                                  | opposite | 6486    | 5.6369     |
| 1   | ENSG00000142892.3 | GPI-anchor transamidase (EC 3.-.-.) (GPI transamidase) (Phosphatidylinositol-glycan biosynthesis                                                                                                                                 | opposite | 5218    | 7.02944    |
| 1   | ENSG00000143151.4 | (blank)                                                                                                                                                                                                                          | opposite | 7334    | 17.7782    |
| 1   | ENSG00000143190.5 | POU domain                                                                                                                                                                                                                       | opposite | 7339    | 23.4733    |
| 1   | ENSG00000143199.4 | "soluble adenylyl cyclase; adenylate cyclase; ATP pyrophosphate-lyase; 3"                                                                                                                                                        | opposite | 5763    | 8.07764    |
| 1   | ENSG00000143207.5 | "constitutive photomorphogenic protein. [Source:RefSeq;Acc:NM_022457]"                                                                                                                                                           | opposite | 5836    | 8.4055     |
| 1   | ENSG00000143341.2 | "hemicentin; fibulin 6. [Source:RefSeq;Acc:NM_031935]"                                                                                                                                                                           | opposite | 7442    | 12.8011    |
| 1   | ENSG00000143344.3 | "Ral guanine nucleotide dissociation stimulator-like 1 (RalGDS-like 1). [Source:SWISSPROT;Acc:Q9NZL6]"                                                                                                                           | same     | 5863    | 4.50732    |
| 1   |                   |                                                                                                                                                                                                                                  | opposite | 7433    | 21.9469    |
| 1   | ENSG00000143457.1 | "GPP34-related protein. [Source:RefSeq;Acc:NM_018178]"                                                                                                                                                                           | opposite | 5668    | 24.7978    |
| 1   | ENSG00000143469.2 | "synaptotagmin XIV. [Source:RefSeq;Acc:NM_153262]"                                                                                                                                                                               | opposite | 7758    | 15.534     |
| 1   | ENSG00000143552.1 | (blank)                                                                                                                                                                                                                          | opposite | 5683    | 18.1017    |
| 1   | ENSG00000143653.2 | (blank)                                                                                                                                                                                                                          | opposite | 7928    | 8.00952    |
| 1   | ENSG00000143669.1 | "Lysosomal trafficking regulator (Beige homolog). [Source:SWISSPROT;Acc:Q99698]"                                                                                                                                                 | opposite | 6353    | 3.84261    |
| 1   | ENSG00000143850.1 | "phosphoinositol 3-phosphate-binding protein-3. [Source:RefSeq;Acc:NM_014935]"                                                                                                                                                   | opposite | 6161    | 7.20463    |
| 1   | ENSG00000152763.4 | (blank)                                                                                                                                                                                                                          | same     | 6647    | 5.02799    |
| 1   | ENSG00000153936.5 | "heparan sulfate 2-O-sulfotransferase 1. [Source:RefSeq;Acc:NM_012262]"                                                                                                                                                          | same     | 5330    | 7.39945    |
| 1   | ENSG00000154198.3 | (blank)                                                                                                                                                                                                                          | opposite | 5024    | 3.40297    |
| 1   | ENSG00000154358.5 | obscurin                                                                                                                                                                                                                         | opposite | 7846    | 7.27418    |
| 1   | ENSG00000154370.2 | "Tripartite motif protein 11 (BIA1 protein). [Source:SWISSPROT;Acc:Q96F44]"                                                                                                                                                      | same     | 7846    | 7.27418    |
| 1   | ENSG00000157077.3 | "Mothers against decapentaplegic homolog interacting protein (Madh-interacting protein) (Smad anchor for receptor activation) (Receptor activation anchor) (hSARA) (Novel serine protease) (NSP). [Source:SWISSPROT;Acc:O95405]" | opposite | 6593    | 20.1584    |
| 1   | ENSG00000162374.4 | "ELAV-like protein 4 (Paraneoplastic encephalomyelitis antigen HuD) (Hu-antigen D). [Source:SWISSPROT;Acc:P26378]"                                                                                                               | opposite | 6589    | 3.89602    |
| 1   | ENSG00000162390.5 | "Brown fat inducible thioesterase (EC 3.1.2.-) (BFIT) (Adipose associated thioesterase). [Source:SWISSPROT;Acc:Q8WXI4]"                                                                                                          | same     | 5078    | 15.1492    |
| 1   | ENSG00000162618.1 | "ETL protein (EGF-TM7-latrophilin-related protein). [Source:SPTREMBL;Acc:Q9HBW9]"                                                                                                                                                | opposite | 5240    | 7.45848    |
| 1   | ENSG00000162623.3 | (blank)                                                                                                                                                                                                                          | opposite | 6754    | 12.549     |
| 1   | ENSG00000162779.5 | (blank)                                                                                                                                                                                                                          | opposite | 7418    | 9.67356    |
| 1   | ENSG00000162787.3 | "regulator of G-protein signalling like 1. [Source:RefSeq;Acc:NM_181572]"                                                                                                                                                        | opposite | 7430    | 4.02892    |
| 1   | ENSG00000162852.4 | (blank)                                                                                                                                                                                                                          | opposite | 7925    | 7.23395    |
| 1   |                   |                                                                                                                                                                                                                                  |          | 7926    | 9.36071    |
| 1   |                   |                                                                                                                                                                                                                                  |          | 7927    | 50.514     |
| 1   | ENSG00000162901.1 | (blank)                                                                                                                                                                                                                          | same     | 7747    | 2.55454    |
| 1   | ENSG00000162946.4 | "Disrupted in schizophrenia 1 protein. [Source:SWISSPROT;Acc:Q9NRI5]"                                                                                                                                                            | opposite | 7854    | 18.5469    |
| 1   | ENSG00000163386.4 | (blank)                                                                                                                                                                                                                          | opposite | 7208    | 2.86689    |
| 1   | ENSG00000163564.2 | "interferon-inducible protein X alpha 1 isoform. [Source:RefSeq;Acc:NM_152501]"                                                                                                                                                  | opposite | 7291    | 7.29365    |
| 1   |                   |                                                                                                                                                                                                                                  |          | 7292    | 4.38674    |

| Chr | Ensembl id        | Description                                                                                                                                                                                                                                                        | Strand   | HERV id | HERV score |
|-----|-------------------|--------------------------------------------------------------------------------------------------------------------------------------------------------------------------------------------------------------------------------------------------------------------|----------|---------|------------|
| 1   | ENSG00000163565.4 | "Gamma-interferon-inducible protein Irf16 (Interferon-inducible myeloid differentiation transcriptional activator) (IFI 16). [Source:SWISSPROT;Acc:Q16666]"                                                                                                        | opposite | 7293    | 5.363      |
| 1   | ENSG00000171502.3 | collagen                                                                                                                                                                                                                                                           | opposite | 5306    | 3.37317    |
| 1   |                   |                                                                                                                                                                                                                                                                    |          | 5311    | 4.62643    |
| 1   | ENSG00000171621.4 | "SPRY domain-containing SOCS box protein SSB-1. [Source:RefSeq;Acc:NM_025106]"                                                                                                                                                                                     | same     | 4918    | 4.7225     |
| 1   |                   |                                                                                                                                                                                                                                                                    |          | 4919    | 4.07078    |
| 1   | ENSG00000171967.4 | (blank)                                                                                                                                                                                                                                                            | opposite | 6542    | 6.33719    |
| 1   | ENSG00000172260.2 | "neuronal growth regulator 1; a kindred of IgLON. [Source:RefSeq;Acc:NM_173808]"                                                                                                                                                                                   | opposite | 5146    | 11.05      |
| 1   |                   |                                                                                                                                                                                                                                                                    |          | 5151    | 3.97414    |
| 1   | ENSG00000173662.5 | "Krueppel-related zinc finger protein 3 (HKR3 protein). [Source:SWISSPROT;Acc:P10074]"                                                                                                                                                                             | opposite | 6460    | 4.69689    |
| 1   |                   |                                                                                                                                                                                                                                                                    |          | 6461    | 17.2918    |
| 1   | ENSG00000175511.4 | "3 beta-hydroxysteroid dehydrogenase/delta 5-->4-isomerase type I (3Beta-HSD I) (Trophoblast antigen FDO161G) [Includes: 3-beta-hydroxy- delta(5)-steroid dehydrogenase (EC 1.1.1.145) (3-beta-hydroxy-5-ene steroid dehydrogenase) (Progesterone reductase); St]" | opposite | 7161    | 13.1115    |
| 1   |                   |                                                                                                                                                                                                                                                                    |          | 7162    | 3.73029    |
| 1   | ENSG00000175709.4 | "Zinc finger protein 73 (Zinc finger protein 186) (hZNF2). [Source:SWISSPROT;Acc:O43830]"                                                                                                                                                                          | opposite | 5618    | 11.5428    |
| 1   | ENSG00000177275.2 | "Seven transmembrane helix receptor. [Source:SPTREMBL;Acc:Q8NGZ0]"                                                                                                                                                                                                 | opposite | 7940    | 11.2885    |
| 1   | ENSG00000177381.2 | "Seven transmembrane helix receptor. [Source:SPTREMBL;Acc:Q8NGY8]"                                                                                                                                                                                                 | opposite | 7938    | 5.35657    |
| 1   | ENSG00000177462.2 | "Olfactory receptor 5AV1. [Source:SWISSPROT;Acc:Q8NHC6]"                                                                                                                                                                                                           | opposite | 7936    | 7.18044    |
| 1   |                   |                                                                                                                                                                                                                                                                    |          | 7938    | 5.35657    |
| 1   |                   |                                                                                                                                                                                                                                                                    |          | 7940    | 11.2885    |
| 1   | ENSG00000177535.3 | "Olfactory receptor 2C3. [Source:SWISSPROT;Acc:Q8N628]"                                                                                                                                                                                                            | same     | 7935    | 0.970044   |
| 1   |                   |                                                                                                                                                                                                                                                                    |          | 7936    | 7.18044    |
| 1   |                   |                                                                                                                                                                                                                                                                    |          | 7938    | 5.35657    |
| 1   |                   |                                                                                                                                                                                                                                                                    | opposite | 6429    | 4.97612    |
| 1   | ENSG00000178961.3 | "TNNI3 interacting kinase; cardiac ankyrin repeat kinase. [Source:RefSeq;Acc:NM_015978]"                                                                                                                                                                           | same     | 5192    | 6.574      |
| 1   | ENSG00000179397.4 | (blank)                                                                                                                                                                                                                                                            | same     | 6406    | 8.26898    |
| 1   |                   |                                                                                                                                                                                                                                                                    |          | 6407    | 4.98223    |
| 1   | ENSG00000180287.4 | (blank)                                                                                                                                                                                                                                                            | opposite | 6386    | 15.1809    |
| 1   |                   |                                                                                                                                                                                                                                                                    |          | 6389    | 11.7697    |
| 1   | ENSG00000183682.2 | "Bone morphogenetic protein 8B precursor (BMP-8B) (BMP-8) (Osteogenic protein 2) (OP-2). [Source:SWISSPROT;Acc:P34820]"                                                                                                                                            | same     | 4999    | 0.915857   |
| 1   | ENSG00000183831.1 | (blank)                                                                                                                                                                                                                                                            | opposite | 5812    | 10.1077    |
| 1   | ENSG00000184155.3 | "Olfactory receptor 10J5. [Source:SWISSPROT;Acc:Q8NHC4]"                                                                                                                                                                                                           | same     | 7295    | 5.21188    |
| 1   |                   |                                                                                                                                                                                                                                                                    | opposite | 5713    | 4.6983     |
| 1   |                   |                                                                                                                                                                                                                                                                    |          | 5714    | 4.62897    |
| 1   | ENSG00000184588.4 | cAMP-specific 3'                                                                                                                                                                                                                                                   | opposite | 6643    | 5.08327    |
| 1   | ENSG00000186140.3 | "myelin protein zero-like 1; protein zero related. [Source:RefSeq;Acc:NM_003953]"                                                                                                                                                                                  | opposite | 7343    | 3.86411    |
| 1   |                   |                                                                                                                                                                                                                                                                    |          | 7344    | 4.39683    |
| 1   | ENSG00000186160.1 | "cytochrome P450 4Z1. [Source:RefSeq;Acc:NM_178134]"                                                                                                                                                                                                               | opposite | 6575    | 3.40258    |
| 1   | ENSG00000187080.2 | "Olfactory receptor 2AK2. [Source:SWISSPROT;Acc:Q8NG84]"                                                                                                                                                                                                           | opposite | 7945    | 3.01645    |
| 1   |                   |                                                                                                                                                                                                                                                                    |          | 7946    | 3.25452    |
| 1   |                   |                                                                                                                                                                                                                                                                    |          | 7947    | 3.08341    |
| 1   |                   |                                                                                                                                                                                                                                                                    |          | 7949    | 13.9709    |
| 1   | ENSG00000187481.1 | "3 beta-hydroxysteroid dehydrogenase (Fragment). [Source:SPTREMBL;Acc:Q9UD07]"                                                                                                                                                                                     | opposite | 7162    | 3.73029    |
| 2   | ENSG00000003436.3 | "Tissue factor pathway inhibitor precursor (TFPI) (Lipoprotein- associated coagulation inhibitor) (LACI) (Extrinsic pathway inhibitor) (EPI).                                                                                                                      | opposite | 9349    | 9.76648    |

| Chr | Ensembl id       | Description                                                                                                                                                                                                                                              | Strand   | HERV id | HERV score |
|-----|------------------|----------------------------------------------------------------------------------------------------------------------------------------------------------------------------------------------------------------------------------------------------------|----------|---------|------------|
|     |                  | [Source:SWISSPROT;Acc:P10646]"                                                                                                                                                                                                                           |          |         |            |
| 2   | ENSG0000018510.2 | Alkyldihydroxyacetonephosphate synthase                                                                                                                                                                                                                  | opposite | 10875   | 6.93216    |
| 2   | ENSG0000019169.2 | "Macrophage receptor MARCO (Macrophage receptor with collagenous structure). [Source:SWISSPROT;Acc:Q9UEW3]"                                                                                                                                              | opposite | 10478   | 6.70417    |
| 2   | ENSG0000028116.2 | "Serine/threonine protein kinase VRK2 (EC 2.7.1.37) (Vaccinia-related kinase 2). [Source:SWISSPROT;Acc:Q86Y07]"                                                                                                                                          | opposite | 10066   | 12.4216    |
| 2   | ENSG0000030419.3 | "Zinc finger protein Helios. [Source:SWISSPROT;Acc:Q9UKS7]"                                                                                                                                                                                              | opposite | 9609    | 3.96927    |
| 2   | ENSG0000049323.1 | Latent transforming growth factor beta binding protein                                                                                                                                                                                                   | opposite | 9887    | 15.0095    |
| 2   | ENSG0000055332.3 | Interferon-induced                                                                                                                                                                                                                                       | opposite | 8163    | 20.3552    |
| 2   | ENSG0000064036.4 | "Bone morphogenetic protein receptor type II precursor (EC 2.7.1.37) (BMP type II receptor) (BMPRII). [Source:SWISSPROT;Acc:Q13873]"                                                                                                                     | same     | 9534    | 21.7813    |
| 2   | ENSG0000066032.4 | "Alpha-2 catenin (Alpha-catenin related protein) (Alpha N-catenin). [Source:SWISSPROT;Acc:P26232]"                                                                                                                                                       | opposite | 10195   | 5.8346     |
| 2   | ENSG0000068615.4 | (blank)                                                                                                                                                                                                                                                  | opposite | 8535    | 2.10288    |
| 2   | ENSG0000071909.4 | "myosin IIIB. [Source:RefSeq;Acc:NM_138995]"                                                                                                                                                                                                             | opposite | 10854   | 9.36172    |
| 2   |                  |                                                                                                                                                                                                                                                          |          | 10857   | 10.7429    |
| 2   | ENSG0000075292.2 | "NP220 nuclear protein; CTCL tumor antigen se33-1. [Source:RefSeq;Acc:NM_014497]"                                                                                                                                                                        | same     | 8371    | 16.5015    |
| 2   | ENSG0000075568.3 | "RW1 protein (Fragment). [Source:SWISSPROT;Acc:Q92545]"                                                                                                                                                                                                  | opposite | 8588    | 22.7733    |
| 2   |                  |                                                                                                                                                                                                                                                          |          | 8589    | 15.622     |
| 2   | ENSG0000077232.3 | "ER-resident protein ERdj5; macrothioredoxin; J-domain-containing protein disulfide isomerase-like protein. [Source:RefSeq;Acc:NM_018981]"                                                                                                               | opposite | 10899   | 2.91039    |
| 2   |                  |                                                                                                                                                                                                                                                          |          | 10900   | 8.63685    |
| 2   | ENSG0000081479.3 | "Low-density lipoprotein receptor-related protein 2 precursor (Megalin) (Glycoprotein 330) (gp330). [Source:SWISSPROT;Acc:P98164]"                                                                                                                       | opposite | 9159    | 12.4373    |
| 2   | ENSG0000084754.1 | Trifunctional enzyme alpha subunit                                                                                                                                                                                                                       | opposite | 8102    | 5.0564     |
| 2   | ENSG0000088179.1 | Protein tyrosine phosphatase                                                                                                                                                                                                                             | opposite | 10483   | 3.29305    |
| 2   | ENSG0000091436.5 | "mixed lineage kinase-related kinase MRK-beta; mixed lineage kinase with a leucine zipper and a sterile alpha motif; mixed lineage kinase-related kinase. [Source:RefSeq;Acc:NM_133646]"                                                                 | opposite | 10867   | 2.54379    |
| 2   | ENSG0000115020.5 | "FYVE finger-containing phosphoinositide kinase (EC 2.7.1.68) (1- phosphatidylinositol-4-phosphate 5-kinase) (PIP5K) (PtdIns(4)P-5-kinase) (p235) (Fragment). [Source:SWISSPROT;Acc:Q9Y217]"                                                             | opposite | 11149   | 4.73584    |
| 2   | ENSG0000115239.5 | "Ankyrin repeat and SOCS box containing protein 3 (ASB-3). [Source:SWISSPROT;Acc:Q9Y575]"                                                                                                                                                                | opposite | 8280    | 5.38243    |
| 2   | ENSG0000115252.5 | Calcium/calmodulin-dependent 3'                                                                                                                                                                                                                          | opposite | 9233    | 6.18146    |
| 2   |                  |                                                                                                                                                                                                                                                          |          | 9234    | 3.20005    |
| 2   |                  |                                                                                                                                                                                                                                                          |          | 9235    | 2.23039    |
| 2   |                  |                                                                                                                                                                                                                                                          |          | 9236    | 6.9653     |
| 2   | ENSG0000115339.2 | "polypeptide N-acetylgalactosaminyltransferase 3; protein-UDP acetylgalactosaminyltransferase. [Source:RefSeq;Acc:NM_004482]"                                                                                                                            | same     | 10818   | 3.53648    |
| 2   | ENSG0000115669.4 | "Sulfotransferase 1C1 (EC 2.8.2.-) (SULT1C#1) (ST1C2) (humSULTC2). [Source:SWISSPROT;Acc:O00338]"                                                                                                                                                        | opposite | 10410   | 7.66806    |
| 2   |                  |                                                                                                                                                                                                                                                          |          | 10411   | 3.17108    |
| 2   | ENSG0000115760.1 | "Baculoviral IAP repeat-containing protein 6 (Ubiquitin-conjugating BIR-domain enzyme apollon). [Source:SWISSPROT;Acc:Q9NR09]"                                                                                                                           | opposite | 9884    | 3.26139    |
| 2   | ENSG0000115840.2 | Calcium-binding mitochondrial carrier protein Aralar1 (Mitochondrial aspartate glutamate carrier 1) (Solute carrier family 25                                                                                                                            | opposite | 9174    | 4.52661    |
| 2   |                  |                                                                                                                                                                                                                                                          |          | 9175    | 4.60236    |
| 2   | ENSG0000115919.2 | "Kynureninase (EC 3.7.1.3) (L-kynurenine hydrolase). [Source:SWISSPROT;Acc:Q16719]"                                                                                                                                                                      | opposite | 10640   | 6.0457     |
| 2   |                  |                                                                                                                                                                                                                                                          |          | 10641   | 17.6009    |
| 2   |                  |                                                                                                                                                                                                                                                          |          | 10642   | 21.5473    |
| 2   | ENSG0000115980.2 | "Annexin A4 (Annexin IV) (Lipocortin IV) (Endonexin I) (Chromobindin 4) (Protein II) (P32.5) (Placental anticoagulant protein II) (PAP-II) (PP4-X) (35-beta calcimedlin) (Carbohydrate-binding protein P33/P41) (P33/41). [Source:SWISSPROT;Acc:P09525]" | opposite | 10105   | 9.68452    |
| 2   | ENSG0000118965.3 | "WD repeat domain 35. [Source:RefSeq;Acc:NM_020779]"                                                                                                                                                                                                     | opposite | 8073    | 15.0479    |
| 2   | ENSG0000123596.5 | "Formin binding protein 3 (Huntingtin yeast partner A) (Huntingtin- interacting protein HYP/AFBP11) (Fas-ligand associated factor 1) (NY-                                                                                                                | opposite | 8986    | 15.3264    |

| Chr | Ensembl id        | Description                                                                                                                                                                                                                        | Strand   | HERV id | HERV score |
|-----|-------------------|------------------------------------------------------------------------------------------------------------------------------------------------------------------------------------------------------------------------------------|----------|---------|------------|
|     |                   | REN-6 antigen (HSPC225). [Source:SWISSPROT;Acc:O75400]"                                                                                                                                                                            |          |         |            |
| 2   | ENSG00000135929.1 | Cytochrome P450 27                                                                                                                                                                                                                 | opposite | 11242   | 5.44303    |
| 2   | ENSG00000138081.5 | "F-box only protein 11 (Vitiligo-associated protein VIT-1). [Source:SWISSPROT;Acc:Q86XK2]"                                                                                                                                         | opposite | 8194    | 4.6315     |
| 2   | ENSG00000138400.2 | (blank)                                                                                                                                                                                                                            | opposite | 9543    | 4.27293    |
| 2   | ENSG00000143797.2 | (blank)                                                                                                                                                                                                                            | same     | 9788    | 21.048     |
| 2   | ENSG00000143951.5 | (blank)                                                                                                                                                                                                                            | same     | 10083   | 4.46253    |
| 2   |                   |                                                                                                                                                                                                                                    | opposite | 8333    | 3.81265    |
| 2   |                   |                                                                                                                                                                                                                                    |          | 8335    | 11.8262    |
| 2   | ENSG00000144039.4 | "similar to POSSIBLE GUSTATORY RECEPTOR CLONE PTE01. [Source:RefSeq;Acc:NM_145242]"                                                                                                                                                | same     | 8369    | 35.2145    |
| 2   |                   |                                                                                                                                                                                                                                    |          | 8370    | 23.1174    |
| 2   | ENSG00000144229.1 | (blank)                                                                                                                                                                                                                            | same     | 8868    | 7.55411    |
| 2   | ENSG00000144278.2 | "UDP-N-acetyl-alpha-D-galactosamine:polypeptide N-acetylgalactosaminyltransferase 13; GalNAc transferase 13. [Source:RefSeq;Acc:NM_052917]"                                                                                        | opposite | 10733   | 1.63746    |
| 2   |                   |                                                                                                                                                                                                                                    |          | 10736   | 5.87998    |
| 2   | ENSG00000144290.1 | solute carrier family 4                                                                                                                                                                                                            | opposite | 10788   | 1.94963    |
| 2   |                   |                                                                                                                                                                                                                                    |          | 10789   | 7.30948    |
| 2   | ENSG00000144331.5 | "zinc finger protein 533. [Source:RefSeq;Acc:NM_152520]"                                                                                                                                                                           | opposite | 9200    | 2.40279    |
| 2   | ENSG00000144339.1 | "transmembrane protein with EGF-like and two follistatin-like domains 2; transmembrane protein TENB2; tomoregulin; putative transmembrane protein with EGF-like and two follistatin-like domains 2. [Source:RefSeq;Acc:NM_016192]" | opposite | 9403    | 5.93519    |
| 2   |                   |                                                                                                                                                                                                                                    |          | 9404    | 11.4631    |
| 2   | ENSG00000144362.2 | (blank)                                                                                                                                                                                                                            | opposite | 10852   | 2.91819    |
| 2   | ENSG00000144366.5 | GULP                                                                                                                                                                                                                               | opposite | 11002   | 2.16342    |
| 2   | ENSG00000144451.4 | "PF20; sperm-associated WD repeat protein; WD repeat domain 29. [Source:RefSeq;Acc:NM_024532]"                                                                                                                                     | same     | 9612    | 4.24042    |
| 2   |                   |                                                                                                                                                                                                                                    |          | 9615    | 9.56672    |
| 2   |                   |                                                                                                                                                                                                                                    | opposite | 11208   | 4.61491    |
| 2   |                   |                                                                                                                                                                                                                                    |          | 11209   | 4.1076     |
| 2   |                   |                                                                                                                                                                                                                                    |          | 11215   | 11.146     |
| 2   | ENSG00000144452.3 | ATP-binding cassette                                                                                                                                                                                                               | opposite | 9622    | 18.5713    |
| 2   | ENSG00000152256.1 | [Pyruvate dehydrogenase [lipoamide]] kinase isozyme 1                                                                                                                                                                              | opposite | 10863   | 9.98566    |
| 2   | ENSG00000153107.3 | "Anaphase promoting complex subunit 1 (APC1) (Cyclosome subunit 1) (Protein Tsg24) (Mitotic checkpoint regulator). [Source:SWISSPROT;Acc:Q9H1A4]"                                                                                  | opposite | 8671    | 7.9406     |
| 2   | ENSG00000155754.3 | (blank)                                                                                                                                                                                                                            | same     | 11139   | 5.25937    |
| 2   | ENSG00000157985.4 | "Centaurin gamma 2. [Source:SWISSPROT;Acc:Q9UPQ3]"                                                                                                                                                                                 | opposite | 11307   | 5.68328    |
| 2   | ENSG00000162944.1 | (blank)                                                                                                                                                                                                                            | opposite | 9522    | 23.7498    |
| 2   |                   |                                                                                                                                                                                                                                    |          | 9523    | 9.85501    |
| 2   | ENSG00000163067.3 | "zinc finger protein 2. [Source:RefSeq;Acc:NM_021088]"                                                                                                                                                                             | opposite | 10344   | 5.3431     |
| 2   |                   |                                                                                                                                                                                                                                    |          | 10347   | 1.35124    |
| 2   | ENSG00000163082.4 | "Sphingosine-1-phosphate phosphatase 2 (EC 3.1.3.-) (Sphingosine-1- phosphatase 2) (SPPase2) (Spp2) (hSPP2). [Source:SWISSPROT;Acc:Q8IWX5]"                                                                                        | opposite | 11256   | 7.22338    |
| 2   | ENSG00000163464.2 | "High affinity interleukin-8 receptor A (IL-8R A) (IL-8 receptor type 1) (CXCR-1) (CDw128a). [Source:SWISSPROT;Acc:P25024]"                                                                                                        | same     | 11237   | 24.8766    |
| 2   |                   |                                                                                                                                                                                                                                    |          | 11238   | 19.8714    |
| 2   |                   |                                                                                                                                                                                                                                    | opposite | 9642    | 12.7854    |
| 2   | ENSG00000168702.4 | "low density lipoprotein-related protein 1B; low density lipoprotein receptor related protein-deleted in tumor. [Source:RefSeq;Acc:NM_018557]"                                                                                     | opposite | 8904    | 19.0724    |

| Chr | Ensembl id        | Description                                                                                                                                                                                       | Strand   | HERV id | HERV score |
|-----|-------------------|---------------------------------------------------------------------------------------------------------------------------------------------------------------------------------------------------|----------|---------|------------|
| 2   |                   |                                                                                                                                                                                                   |          | 8907    | 3.70431    |
| 2   | ENSG00000170396.2 | (blank)                                                                                                                                                                                           | opposite | 10926   | 3.58223    |
| 2   | ENSG00000172071.1 | "Eukaryotic translation initiation factor 2-alpha kinase 3 precursor (EC 2.7.1.-) (PRKR-like endoplasmic reticulum kinase) (Pancreatic eIF2-alpha kinase) (HsPEK). [Source:SWISSPROT;Acc:Q9NZJ5]" | opposite | 8546    | 3.61768    |
| 2   | ENSG00000172554.3 | "Gamma-2-syntrophin (G2SYN) (Syntrophin 5) (SYN5). [Source:SWISSPROT;Acc:Q9NY99]"                                                                                                                 | opposite | 9749    | 3.02119    |
| 2   | ENSG00000172954.2 | "HSRG1849. [Source:RefSeq;Acc:NM_182551]"                                                                                                                                                         | same     | 8111    | 7.36761    |
| 2   | ENSG00000173163.1 | "MURR1; copper metabolism gene MURR1; chromosome 2 open reading frame 5 (MURR1). [Source:RefSeq;Acc:NM_152516]"                                                                                   | opposite | 10075   | 2.50642    |
| 2   |                   |                                                                                                                                                                                                   |          | 10077   | 17.7549    |
| 2   |                   |                                                                                                                                                                                                   |          | 10078   | 7.81869    |
| 2   | ENSG00000173692.1 | "26S proteasome non-ATPase regulatory subunit 1 (26S proteasome regulatory subunit S1) (26S proteasome subunit p112). [Source:SWISSPROT;Acc:Q99460]"                                              | opposite | 11298   | 10.8286    |
| 2   | ENSG00000175497.4 | "dipeptidylpeptidase 10; dipeptidyl peptidase IV-related protein 3. [Source:RefSeq;Acc:NM_020868]"                                                                                                | opposite | 10438   | 3.10468    |
| 2   |                   |                                                                                                                                                                                                   |          | 10439   | 5.70719    |
| 2   |                   |                                                                                                                                                                                                   |          | 10441   | 7.43805    |
| 2   | ENSG00000175701.1 | (blank)                                                                                                                                                                                           | opposite | 8663    | 0.966058   |
| 2   | ENSG00000175772.4 | (blank)                                                                                                                                                                                           | opposite | 10420   | 4.05274    |
| 2   | ENSG00000176120.2 | (blank)                                                                                                                                                                                           | opposite | 8658    | 8.56404    |
| 2   | ENSG00000178568.4 | "Receptor protein-tyrosine kinase erbB-4 precursor (EC 2.7.1.112) (p180erbB4) (Tyrosine kinase-type cell surface receptor HER4). [Source:SWISSPROT;Acc:Q15303]"                                   | opposite | 9607    | 6.36343    |
| 2   | ENSG00000183840.2 | "Putative G protein-coupled receptor GPR39. [Source:SWISSPROT;Acc:O43194]"                                                                                                                        | opposite | 10578   | 3.54725    |
| 2   | ENSG00000188941.1 | "Nonhistone chromosomal protein HMG-14 (High-mobility group nucleosome binding domain 1). [Source:SWISSPROT;Acc:P05114]"                                                                          | same     | 8589    | 15.622     |
| 3   | ENSG00000008226.5 | "deleted in lung and esophageal cancer 1 isoform DLEC1-S2; deleted in lung cancer 1. [Source:RefSeq;Acc:NM_007336]"                                                                               | opposite | 13250   | 17.2349    |
| 3   | ENSG00000047849.5 | "Microtubule-associated protein 4 (MAP 4). [Source:SWISSPROT;Acc:P27816]"                                                                                                                         | opposite | 11587   | 3.88789    |
| 3   |                   |                                                                                                                                                                                                   |          | 11588   | 6.16058    |
| 3   | ENSG00000058705.4 | "Interleukin-1 receptor accessory protein precursor (IL-1 receptor accessory protein) (IL-1RAcP). [Source:SWISSPROT;Acc:Q9NPH3]"                                                                  | opposite | 14695   | 8.42737    |
| 3   | ENSG00000073803.2 | "mitogen-activated protein kinase kinase kinase 13; leucine zipper-bearing kinase. [Source:RefSeq;Acc:NM_004721]"                                                                                 | opposite | 14673   | 19.0735    |
| 3   | ENSG00000075711.4 | Presynaptic protein SAP97 (Synapse-associated protein 97) (Discs                                                                                                                                  | same     | 14736   | 9.33089    |
| 3   | ENSG00000082701.3 | "Glycogen synthase kinase-3 beta (EC 2.7.1.37) (GSK-3 beta). [Source:SWISSPROT;Acc:P49841]"                                                                                                       | opposite | 12311   | 5.27889    |
| 3   |                   |                                                                                                                                                                                                   |          | 12312   | 6.37235    |
| 3   | ENSG00000088538.4 | "Dedicator of cytokinesis protein 3 (Modifier of cell adhesion) (Preselinin binding protein) (PBP protein). [Source:SWISSPROT;Acc:Q81ZD9]"                                                        | opposite | 13320   | 4.96073    |
| 3   | ENSG00000113966.2 | "ADP-ribosylation factor-like protein 6. [Source:SWISSPROT;Acc:Q9H0F7]"                                                                                                                           | opposite | 13786   | 2.88018    |
| 3   | ENSG00000114127.2 | "strand-exchange protein 1. [Source:RefSeq;Acc:NM_019001]"                                                                                                                                        | opposite | 12426   | 22.0743    |
| 3   | ENSG00000114439.3 | "HMG-BOX transcription factor BBX; x 001 protein. [Source:RefSeq;Acc:NM_020235]"                                                                                                                  | opposite | 13927   | 7.63301    |
| 3   | ENSG00000114670.2 | "NIMA (never in mitosis gene a)- related kinase 11. [Source:RefSeq;Acc:NM_145910]"                                                                                                                | opposite | 14073   | 13.7934    |
| 3   | ENSG00000114757.5 | "PXR2b protein. [Source:RefSeq;Acc:NM_016559]"                                                                                                                                                    | opposite | 12909   | 7.31341    |
| 3   | ENSG00000118007.3 | "Cohesin subunit SA-1 (Stromal antigen 1) (SCC3 homolog 1). [Source:SWISSPROT;Acc:Q8WVM7]"                                                                                                        | opposite | 12404   | 4.06128    |
| 3   | ENSG00000120742.1 | "stress-associated endoplasmic reticulum protein 1; ribosome associated membrane protein 4. [Source:RefSeq;Acc:NM_014445]"                                                                        | opposite | 12537   | 9.05524    |
| 3   | ENSG00000134108.1 | "ADP-ribosylation factor-like 10C. [Source:RefSeq;Acc:NM_018184]"                                                                                                                                 | opposite | 13023   | 16.3542    |
| 3   | ENSG00000134115.2 | "contactin 6; neural adhesion molecule. [Source:RefSeq;Acc:NM_014461]"                                                                                                                            | opposite | 13002   | 17.1454    |
| 3   | ENSG00000136523.4 | Dynamin-like 120 kDa protein                                                                                                                                                                      | opposite | 14734   | 8.11423    |
| 3   | ENSG00000144893.2 | "TRALPUSH; no opposite paired repeat protein. [Source:RefSeq;Acc:NM_053002]"                                                                                                                      | opposite | 14224   | 3.75331    |
| 3   | ENSG00000144908.2 | "10-formyltetrahydrofolate dehydrogenase (EC 1.5.1.6) (10-FTHFDH). [Source:SWISSPROT;Acc:O75891]"                                                                                                 | opposite | 12348   | 6.70428    |
| 3   | ENSG00000144959.1 | (blank)                                                                                                                                                                                           | opposite | 12828   | 3.82664    |

| Chr | Ensembl id        | Description                                                                                                                                                                                                                           | Strand   | HERV id | HERV score |
|-----|-------------------|---------------------------------------------------------------------------------------------------------------------------------------------------------------------------------------------------------------------------------------|----------|---------|------------|
| 3   | ENSG00000144974.5 | (blank)                                                                                                                                                                                                                               | same     | 14267   | 4.4094     |
| 3   | ENSG00000145087.3 | (blank)                                                                                                                                                                                                                               | opposite | 14017   | 2.66834    |
| 3   |                   |                                                                                                                                                                                                                                       |          | 14019   | 22.0974    |
| 3   |                   |                                                                                                                                                                                                                                       |          | 14035   | 19.2651    |
| 3   | ENSG00000151967.5 | "schwannomin interacting protein 1. [Source:RefSeq;Acc:NM_014575]"                                                                                                                                                                    | opposite | 14280   | 5.59543    |
| 3   | ENSG00000156931.2 | (blank)                                                                                                                                                                                                                               | opposite | 14666   | 13.2359    |
| 3   |                   |                                                                                                                                                                                                                                       |          | 14667   | 23.9932    |
| 3   | ENSG00000157388.2 | Voltage-dependent L-type calcium channel alpha-1D subunit (Calcium channel                                                                                                                                                            | opposite | 13328   | 3.18688    |
| 3   | ENSG00000157445.4 | calcium channel                                                                                                                                                                                                                       | opposite | 13333   | 12.4605    |
| 3   | ENSG00000163610.3 | (blank)                                                                                                                                                                                                                               | same     | 13984   | 3.11062    |
| 3   |                   |                                                                                                                                                                                                                                       | opposite | 12255   | 8.11777    |
| 3   | ENSG00000163617.1 | (blank)                                                                                                                                                                                                                               | opposite | 12258   | 3.85945    |
| 3   | ENSG00000163630.1 | "Synaptopodin. [Source:SWISSPROT;Acc:Q8TBG9]"                                                                                                                                                                                         | opposite | 13360   | 4.20588    |
| 3   | ENSG00000163669.2 | (blank)                                                                                                                                                                                                                               | same     | 13344   | 1.39985    |
| 3   |                   |                                                                                                                                                                                                                                       | opposite | 11623   | 13.9933    |
| 3   | ENSG00000163808.2 | "kinesin-like 7; kinesin-like protein 2. [Source:RefSeq;Acc:NM_020242]"                                                                                                                                                               | opposite | 13283   | 8.65991    |
| 3   | ENSG00000163833.3 | "muscle disease-related protein. [Source:RefSeq;Acc:NM_016298]"                                                                                                                                                                       | same     | 12322   | 1.36744    |
| 3   |                   |                                                                                                                                                                                                                                       | opposite | 14036   | 9.04266    |
| 3   | ENSG00000168038.2 | (blank)                                                                                                                                                                                                                               | opposite | 11565   | 3.57693    |
| 3   | ENSG00000168160.4 | "Metabotropic glutamate receptor 7 precursor (mGluR7). [Source:SWISSPROT;Acc:Q14831]"                                                                                                                                                 | same     | 11365   | 5.14045    |
| 3   | ENSG00000169064.2 | (blank)                                                                                                                                                                                                                               | opposite | 12803   | 6.95158    |
| 3   |                   |                                                                                                                                                                                                                                       |          | 12804   | 20.7235    |
| 3   | ENSG00000169760.4 | "Neurologin 1 precursor. [Source:SWISSPROT;Acc:Q8N2Q7]"                                                                                                                                                                               | opposite | 14592   | 4.37163    |
| 3   | ENSG00000169855.5 | "roundabout 1 isoform a; roundabout 1; axon guidance receptor. [Source:RefSeq;Acc:NM_002941]"                                                                                                                                         | opposite | 11697   | 16.7925    |
| 3   | ENSG00000170011.2 | "Rab effector MyRIP (Myosin-VIIa- and Rab-interacting protein) (Exophilin 8) (Slp homolog lacking C2 domains-c). [Source:SWISSPROT;Acc:Q8NFW9]"                                                                                       | same     | 11557   | 2.67807    |
| 3   | ENSG00000170819.1 | "Phakinin (Beaded filament structural protein 2) (Lens fiber cell beaded filament protein CP 49) (CP49) (49 kDa cytoskeletal protein) (CP 47) (CP47) (Lens intermediate filament like-light) (LIFL-L). [Source:SWISSPROT;Acc:Q13515]" | same     | 12392   | 16.578     |
| 3   | ENSG00000171088.1 | "Histamine H1 receptor. [Source:SWISSPROT;Acc:P35367]"                                                                                                                                                                                | opposite | 13057   | 10.0402    |
| 3   | ENSG00000172139.3 | (blank)                                                                                                                                                                                                                               | opposite | 12245   | 1.44335    |
| 3   | ENSG00000172578.2 | "Kelch-like protein 6. [Source:SWISSPROT;Acc:Q8WZ60]"                                                                                                                                                                                 | opposite | 12931   | 1.2479     |
| 3   | ENSG00000172667.2 | "p53 target zinc finger protein isoform 1; zinc finger protein WIG1; WIG-1/PAG608 protein. [Source:RefSeq;Acc:NM_022470]"                                                                                                             | opposite | 12905   | 14.0119    |
| 3   | ENSG00000172752.3 | (blank)                                                                                                                                                                                                                               | opposite | 14068   | 19.0173    |
| 3   | ENSG00000173389.4 | (blank)                                                                                                                                                                                                                               | same     | 13322   | 10.7558    |
| 3   |                   |                                                                                                                                                                                                                                       | opposite | 11608   | 14.7273    |
| 3   |                   |                                                                                                                                                                                                                                       |          | 11611   | 6.96952    |
| 3   | ENSG00000173421.4 | (blank)                                                                                                                                                                                                                               | same     | 11594   | 24.4797    |
| 3   |                   |                                                                                                                                                                                                                                       | opposite | 13308   | 15.2837    |
| 3   | ENSG00000174640.3 | "Solute carrier family 21 member 2 (Prostaglandin transporter) (PGT). [Source:SWISSPROT;Acc:Q92959]"                                                                                                                                  | opposite | 12397   | 7.9659     |
| 3   | ENSG00000174948.3 | "G protein-coupled receptor PGR10 (Fragment). [Source:SPTREMBL;Acc:Q86SP6]"                                                                                                                                                           | opposite | 12575   | 7.70751    |
| 3   | ENSG00000175928.1 | "leucine rich repeat neuronal 1. [Source:RefSeq;Acc:NM_020873]"                                                                                                                                                                       | opposite | 13017   | 5.84825    |
| 3   | ENSG00000176945.3 | "mucin 20. [Source:RefSeq;Acc:NM_152673]"                                                                                                                                                                                             | same     | 12988   | 1.29043    |
| 3   | ENSG00000178055.5 | "testis serine protease 2. [Source:RefSeq;Acc:NM_182702]"                                                                                                                                                                             | same     | 13303   | 4.97266    |
| 3   | ENSG00000179152.3 | (blank)                                                                                                                                                                                                                               | opposite | 13278   | 15.7649    |

| Chr | Ensembl id        | Description                                                                                                                                                                                 | Strand   | HERV id | HERV score |
|-----|-------------------|---------------------------------------------------------------------------------------------------------------------------------------------------------------------------------------------|----------|---------|------------|
| 3   | ENSG00000179799.4 | "Seven transmembrane helix receptor. [Source:SPTREMBL;Acc:Q8NHB5]"                                                                                                                          | same     | 13386   | 38.2321    |
| 3   | ENSG00000181804.2 | solute carrier family 9 (sodium/hydrogen exchanger)                                                                                                                                         | opposite | 12440   | 21.8188    |
| 3   | ENSG00000182247.1 | ubiquitin-conjugating enzyme E2E 2 (UBC4/5 homolog)                                                                                                                                         | opposite | 13142   | 2.42396    |
| 3   | ENSG00000183625.2 | "C-C chemokine receptor type 3 (C-C CKR-3) (CC-CKR-3) (CCR-3) (CCR3) (CKR3) (Eosinophil eotaxin receptor). [Source:SWISSPROT;Acc:P51677]"                                                   | opposite | 13294   | 16.2431    |
| 3   | ENSG00000183662.1 | "TAF41. [Source:SPTREMBL;Acc:Q7Z5A9]"                                                                                                                                                       | same     | 11647   | 7.60009    |
| 3   | ENSG00000183960.1 | "Potassium voltage-gated channel subfamily H member 8 (Ether-a-go-go-like potassium channel 3) (ELK channel 3) (ELK3) (ELK1) (hElk1). [Source:SWISSPROT;Acc:Q96L42]"                        | opposite | 13101   | 27.3844    |
| 3   | ENSG00000184500.3 | "Vitamin K-dependent protein S precursor. [Source:SWISSPROT;Acc:P07225]"                                                                                                                    | opposite | 11967   | 20.4756    |
| 3   | ENSG00000185565.1 | "Limbic system-associated membrane protein precursor (LSAMP). [Source:SWISSPROT;Acc:Q13449]"                                                                                                | same     | 13992   | 11.7228    |
| 4   | ENSG00000038210.1 | "phosphatidylinositol 4-kinase type-II beta; likely ortholog of mouse phosphatidylinositol 4-kinase type 2 beta. [Source:RefSeq;Acc:NM_018323]"                                             | opposite | 17355   | 23.4402    |
| 4   | ENSG00000087008.3 | Acyl-coenzyme A oxidase 3                                                                                                                                                                   | opposite | 14778   | 25.2086    |
| 4   |                   |                                                                                                                                                                                             |          | 14779   | 8.66843    |
| 4   | ENSG00000109220.1 | "cysteine-rich hydrophobic domain 2; BRX-like translocated in leukemia; cysteine-rich hydrophobic domain 2. [Source:RefSeq;Acc:NM_012110]"                                                  | opposite | 15210   | 10.9777    |
| 4   | ENSG00000109323.1 | "Beta-mannosidase precursor (EC 3.2.1.25) (Mannanase) (Mannase). [Source:SWISSPROT;Acc:O00462]"                                                                                             | same     | 18394   | 9.27675    |
| 4   | ENSG00000109458.1 | "GRB2-associated binding protein 1. [Source:RefSeq;Acc:NM_002039]"                                                                                                                          | opposite | 19024   | 7.40914    |
| 4   | ENSG00000109472.1 | "Carboxypeptidase H precursor (EC 3.4.17.10) (CPH) (Carboxypeptidase E) (CPE) (Enkephalin convertase) (Prohormone processing carboxypeptidase). [Source:SWISSPROT;Acc:P16870]"              | opposite | 19271   | 5.79495    |
| 4   | ENSG00000109586.1 | "polypeptide N-acetylgalactosaminyltransferase 7. [Source:RefSeq;Acc:NM_017423]"                                                                                                            | opposite | 19412   | 8.168      |
| 4   | ENSG00000109674.1 | "DNA glycosylase hFPG2. [Source:RefSeq;Acc:NM_018248]"                                                                                                                                      | opposite | 19503   | 3.06013    |
| 4   | ENSG00000109689.3 | "Stromal interaction molecule 2 precursor. [Source:SWISSPROT;Acc:Q9P246]"                                                                                                                   | opposite | 17356   | 3.60513    |
| 4   |                   |                                                                                                                                                                                             |          | 17357   | 6.06244    |
| 4   | ENSG00000109697.5 | "Lipopolysaccharide-responsive and beige-like anchor protein (CDC4-like protein) (Beige-like protein). [Source:SWISSPROT;Acc:P50851]"                                                       | same     | 19060   | 4.80571    |
| 4   |                   |                                                                                                                                                                                             |          | 19061   | 4.68807    |
| 4   | ENSG00000109762.4 | "Sorting nexin 25 (MSTP043). [Source:SWISSPROT;Acc:Q9H3E2]"                                                                                                                                 | opposite | 19567   | 10.3424    |
| 4   | ENSG00000118777.2 | ATP-binding cassette                                                                                                                                                                        | same     | 18206   | 25.2901    |
| 4   | ENSG00000124406.3 | "Potential phospholipid-transporting ATPase IA (EC 3.6.3.1) (Chromaffin granule ATPase II) (ATPase class I type 8A member 1). [Source:SWISSPROT;Acc:Q9Y2Q0]"                                | opposite | 15105   | 6.73092    |
| 4   | ENSG00000127589.1 | "Tubulin beta-4q chain. [Source:SWISSPROT;Acc:Q99867]"                                                                                                                                      | same     | 19602   | 17.7658    |
| 4   | ENSG00000131127.4 | "Zinc finger protein 141. [Source:SWISSPROT;Acc:Q15928]"                                                                                                                                    | same     | 14747   | 20.1293    |
| 4   |                   |                                                                                                                                                                                             |          | 14748   | 4.79246    |
| 4   |                   |                                                                                                                                                                                             |          | 14749   | 17.6066    |
| 4   |                   |                                                                                                                                                                                             | opposite | 17201   | 6.49515    |
| 4   | ENSG00000137462.2 | "Toll-like receptor 2 precursor (Toll/interleukin 1 receptor-like protein 4). [Source:SWISSPROT;Acc:O60603]"                                                                                | opposite | 19074   | 20.292     |
| 4   | ENSG00000138653.1 | "N-deacetylase/N-sulfotransferase (heparan glucosaminyl) 4; N-deacetylase/N-sulfotransferase 4. [Source:RefSeq;Acc:NM_022569]"                                                              | opposite | 16049   | 4.44547    |
| 4   |                   |                                                                                                                                                                                             |          | 16050   | 4.99418    |
| 4   | ENSG00000138759.4 | "Fraser syndrome 1 isoform 1; extracellular matrix protein. [Source:RefSeq;Acc:NM_025074]"                                                                                                  | same     | 15697   | 8.3448     |
| 4   | ENSG00000145242.3 | "Ephrin type-A receptor 5 precursor (EC 2.7.1.112) (Tyrosine-protein kinase receptor EHk-1) (Eph homology kinase-1) (Receptor protein-tyrosine kinase HEK7). [Source:SWISSPROT;Acc:P54756]" | opposite | 15421   | 5.72202    |
| 4   | ENSG00000145348.3 | (blank)                                                                                                                                                                                     | opposite | 15993   | 21.2442    |
| 4   | ENSG00000145375.2 | "spermatogenesis associated factor SPAF. [Source:RefSeq;Acc:NM_145207]"                                                                                                                     | opposite | 18603   | 1.76079    |



| Chr | Ensembl id        | Description                                                                                                                                                                         | Strand   | HERV id | HERV score |
|-----|-------------------|-------------------------------------------------------------------------------------------------------------------------------------------------------------------------------------|----------|---------|------------|
| 4   | ENSG00000145431.1 | "platelet-derived growth factor C precursor; spinal cord-derived growth factor; secretory growth factor-like protein; fallotein. [Source:RefSeq;Acc:NM_016205]"                     | opposite | 16708   | 2.31824    |
| 4   | ENSG00000150471.2 | "latrophilin 3; latrophilin homolog 3 (cow); lectomedin 3. [Source:RefSeq;Acc:NM_015236]"                                                                                           | opposite | 17816   | 9.49212    |
| 4   | ENSG00000151612.3 | (blank)                                                                                                                                                                             | opposite | 16630   | 13.6936    |
| 4   | ENSG00000151623.4 | "Mineralocorticoid receptor (MR). [Source:SWISSPROT;Acc:P08235]"                                                                                                                    | opposite | 16645   | 7.93464    |
| 4   | ENSG00000151790.1 | Tryptophan 2                                                                                                                                                                        | opposite | 19107   | 1.94886    |
| 4   | ENSG00000151834.4 | "Gamma-aminobutyric-acid receptor alpha-2 subunit precursor (GABA(A) receptor). [Source:SWISSPROT;Acc:P47869]"                                                                      | opposite | 15177   | 5.94512    |
| 4   | ENSG00000152208.2 | "Glutamate receptor delta-2 subunit precursor (GluR delta-2). [Source:SWISSPROT;Acc:O43424]"                                                                                        | opposite | 18277   | 13.1198    |
| 4   |                   |                                                                                                                                                                                     |          | 18281   | 3.06229    |
| 4   | ENSG00000153064.3 | "B-cell scaffold protein with ankyrin repeats 1. [Source:RefSeq;Acc:NM_017935]"                                                                                                     | opposite | 18390   | 30.7491    |
| 4   | ENSG00000154274.4 | (blank)                                                                                                                                                                             | same     | 15097   | 8.68739    |
| 4   | ENSG00000156096.4 | UDP-glucuronosyltransferase 2B11 precursor                                                                                                                                          | same     | 18011   | 10.6168    |
| 4   |                   |                                                                                                                                                                                     | opposite | 15546   | 9.64399    |
| 4   |                   |                                                                                                                                                                                     |          | 15547   | 24.3908    |
| 4   |                   |                                                                                                                                                                                     |          | 15557   | 8.19723    |
| 4   |                   |                                                                                                                                                                                     |          | 15561   | 9.13235    |
| 4   |                   |                                                                                                                                                                                     |          | 15566   | 3.57488    |
| 4   |                   |                                                                                                                                                                                     |          | 15571   | 9.12166    |
| 4   | ENSG00000156234.2 | "Small inducible cytokine B13 precursor (CXCL13) (B lymphocyte chemoattractant) (CXC chemokine BLC) (B cell-attracting chemokine 1) (BCA-1) (ANGIE). [Source:SWISSPROT;Acc:O43927]" | same     | 15692   | 1.04826    |
| 4   | ENSG00000163071.1 | (blank)                                                                                                                                                                             | opposite | 17710   | 3.83743    |
| 4   | ENSG00000163697.4 | "Amyloid beta A4 precursor protein-binding family B member 2 (Fe65-like protein) (Fragment). [Source:SWISSPROT;Acc:Q92870]"                                                         | opposite | 15101   | 3.65655    |
| 4   | ENSG00000164024.2 | "Methionine aminopeptidase 1 (EC 3.4.11.18) (MetAP 1) (MAP 1) (Peptidase M 1). [Source:SWISSPROT;Acc:P53582]"                                                                       | opposite | 18346   | 19.7166    |
| 4   | ENSG00000164025.5 | "Alcohol dehydrogenase class III chi chain (EC 1.1.1.1) (Glutathione- dependent formaldehyde dehydrogenase) (EC 1.2.1.1) (FDH). [Source:SWISSPROT;Acc:P11766]"                      | same     | 18347   | 9.31825    |
| 4   |                   |                                                                                                                                                                                     |          | 18350   | 12.6898    |
| 4   |                   |                                                                                                                                                                                     |          | 18351   | 5.72701    |
| 4   |                   |                                                                                                                                                                                     | opposite | 15904   | 6.55389    |
| 4   |                   |                                                                                                                                                                                     |          | 15905   | 19.3197    |
| 4   | ENSG00000164124.2 | (blank)                                                                                                                                                                             | opposite | 19149   | 9.13386    |
| 4   | ENSG00000164162.3 | "Anaphase promoting complex subunit 10 (APC10) (Cyclosome subunit 10). [Source:SWISSPROT;Acc:Q9UM13]"                                                                               | opposite | 16628   | 8.00514    |
| 4   | ENSG00000164344.1 | "Plasma kallikrein precursor (EC 3.4.21.34) (Plasma prekallikrein) (Kininogenin) (Fletcher factor). [Source:SWISSPROT;Acc:P03952]"                                                  | opposite | 19573   | 21.3931    |
| 4   | ENSG00000168843.3 | "follistatin-like 5. [Source:RefSeq;Acc:NM_020116]"                                                                                                                                 | opposite | 16794   | 4.66891    |
| 4   | ENSG00000170088.4 | (blank)                                                                                                                                                                             | opposite | 16878   | 3.4598     |
| 4   | ENSG00000170516.5 | "cytochrome c oxidase subunit VIIb2. [Source:RefSeq;Acc:NM_130902]"                                                                                                                 | opposite | 15183   | 3.92905    |
| 4   |                   |                                                                                                                                                                                     |          | 15184   | 6.35967    |
| 4   |                   |                                                                                                                                                                                     |          | 15185   | 3.65158    |
| 4   | ENSG00000171234.3 | UDP-glucuronosyltransferase 2B7 precursor                                                                                                                                           | same     | 15557   | 8.19723    |
| 4   |                   |                                                                                                                                                                                     |          | 15561   | 9.13235    |
| 4   |                   |                                                                                                                                                                                     |          | 15566   | 3.57488    |
| 4   |                   |                                                                                                                                                                                     |          | 15571   | 9.12166    |
| 4   |                   |                                                                                                                                                                                     | opposite | 18011   | 10.6168    |
| 4   | ENSG00000178177.1 | "transcription factor MLR1. [Source:RefSeq;Acc:NM_153686]"                                                                                                                          | opposite | 14835   | 4.39154    |
| 4   | ENSG00000178331.2 | UDP-glucuronosyltransferase 2B17 precursor                                                                                                                                          | same     | 17991   | 9.43303    |

| Chr | Ensembl id        | Description                                                                                                                                                                 | Strand   | HERV id | HERV score |
|-----|-------------------|-----------------------------------------------------------------------------------------------------------------------------------------------------------------------------|----------|---------|------------|
| 4   |                   |                                                                                                                                                                             | opposite | 15497   | 26.2999    |
| 4   |                   |                                                                                                                                                                             |          | 15498   | 3.84494    |
| 4   |                   |                                                                                                                                                                             |          | 15499   | 17.9257    |
| 4   | ENSG00000180801.4 | (blank)                                                                                                                                                                     | same     | 18457   | 5.45113    |
| 4   | ENSG00000181381.2 | (blank)                                                                                                                                                                     | opposite | 16941   | 4.58403    |
| 4   | ENSG00000181982.2 | (blank)                                                                                                                                                                     | opposite | 14883   | 4.25652    |
| 4   | ENSG00000183423.2 | (blank)                                                                                                                                                                     | opposite | 18445   | 15.0448    |
| 4   | ENSG00000184305.3 | (blank)                                                                                                                                                                     | opposite | 18222   | 18.3163    |
| 4   |                   |                                                                                                                                                                             |          | 18231   | 0.719592   |
| 4   |                   |                                                                                                                                                                             |          | 18232   | 26.3596    |
| 4   |                   |                                                                                                                                                                             |          | 18233   | 18.7181    |
| 4   |                   |                                                                                                                                                                             |          | 18235   | 1.03146    |
| 4   |                   |                                                                                                                                                                             |          | 18241   | 8.51018    |
| 4   | ENSG00000186777.2 | "Zinc finger protein 27 (Zinc finger protein KOX22) (Fragment). [Source:SWISSPROT;Acc:P17033]"                                                                              | same     | 17203   | 26.1599    |
| 4   |                   |                                                                                                                                                                             |          | 17204   | 14.6679    |
| 4   |                   |                                                                                                                                                                             | opposite | 14755   | 2.34428    |
| 4   |                   |                                                                                                                                                                             |          | 14756   | 3.12538    |
| 4   | ENSG00000186877.1 | (blank)                                                                                                                                                                     | opposite | 19407   | 20.2056    |
| 5   | ENSG00000035499.1 | "HBxAg transactivated protein 1. [Source:RefSeq;Acc:NM_018369]"                                                                                                             | opposite | 20340   | 18.2322    |
| 5   | ENSG00000039123.2 | (blank)                                                                                                                                                                     | opposite | 21939   | 12.6112    |
| 5   | ENSG00000039560.3 | "retinoic acid induced 14; novel retinal pigment epithelial gene. [Source:RefSeq;Acc:NM_015577]"                                                                            | opposite | 21762   | 18.3227    |
| 5   | ENSG00000064652.1 | "Sorting nexin 24 (SBB131). [Source:SWISSPROT;Acc:Q9Y343]"                                                                                                                  | opposite | 22589   | 4.56239    |
| 5   |                   |                                                                                                                                                                             |          | 22590   | 5.9026     |
| 5   | ENSG00000069018.4 | "Short transient receptor potential channel 7 (TrpC7) (TRP7 protein). [Source:SWISSPROT;Acc:Q9HCX4]"                                                                        | opposite | 21067   | 10.9823    |
| 5   | ENSG00000073578.2 | Succinate dehydrogenase [ubiquinone] flavoprotein subunit                                                                                                                   | same     | 19605   | 16.9204    |
| 5   | ENSG00000081842.5 | "Protocadherin alpha 6 precursor (PCDH-alpha6). [Source:SWISSPROT;Acc:Q9UN73]"                                                                                              | opposite | 22680   | 6.60391    |
| 5   | ENSG00000082068.1 | (blank)                                                                                                                                                                     | opposite | 21777   | 0.764352   |
| 5   | ENSG00000112977.3 | "Death-associated protein. [Source:SPTREMBL;Acc:Q9BUC9]"                                                                                                                    | opposite | 19661   | 6.94147    |
| 5   | ENSG00000113159.4 | (blank)                                                                                                                                                                     | opposite | 20431   | 5.48051    |
| 5   | ENSG00000113303.1 | "butyrophilin-like 8. [Source:RefSeq;Acc:NM_024850]"                                                                                                                        | same     | 21243   | 3.01796    |
| 5   | ENSG00000113360.3 | "Ribonuclease III (EC 3.1.26.3) (RNase III) (p241). [Source:SWISSPROT;Acc:Q9NRR4]"                                                                                          | opposite | 20126   | 3.68005    |
| 5   | ENSG00000113448.4 | cAMP-specific 3'                                                                                                                                                            | same     | 21949   | 4.47884    |
| 5   |                   |                                                                                                                                                                             | opposite | 20338   | 2.68765    |
| 5   | ENSG00000113657.2 | "Dihydropyrimidinase related protein-3 (DRP-3) (Unc-33-like phosphoprotein) (ULIP protein) (Collapsin response mediator protein 4) (CRMP-4). [Source:SWISSPROT;Acc:Q14195]" | opposite | 21098   | 4.39067    |
| 5   | ENSG00000122012.3 | (blank)                                                                                                                                                                     | same     | 20438   | 4.70602    |
| 5   | ENSG00000129595.2 | "Band 4.1-like protein 4A (NBL4 protein). [Source:SWISSPROT;Acc:Q9HCS5]"                                                                                                    | opposite | 20907   | 3.3769     |
| 5   | ENSG00000145526.2 | "Cadherin-18 precursor (Cadherin-14). [Source:SWISSPROT;Acc:Q13634]"                                                                                                        | same     | 21360   | 5.96088    |
| 5   |                   |                                                                                                                                                                             | opposite | 19761   | 22.1454    |
| 5   | ENSG00000145623.1 | "oncostatin M receptor. [Source:RefSeq;Acc:NM_003999]"                                                                                                                      | opposite | 21780   | 2.05569    |
| 5   | ENSG00000145626.2 | (blank)                                                                                                                                                                     | same     | 21769   | 4.59538    |
| 5   |                   |                                                                                                                                                                             | opposite | 20150   | 4.68582    |
| 5   | ENSG00000145703.3 | "Ras GTPase-activating-like protein IQGAP2. [Source:SWISSPROT;Acc:Q13576]"                                                                                                  | same     | 20440   | 7.85035    |
| 5   | ENSG00000145819.2 | "Oligophrenin-1 like protein (GTPase regulator associated with focal adhesion kinase). [Source:SWISSPROT;Acc:Q9UNA1]"                                                       | opposite | 22687   | 5.66191    |

| Chr | Ensembl id         | Description                                                                                                                                                                                                                                    | Strand   | HERV id | HERV score |
|-----|--------------------|------------------------------------------------------------------------------------------------------------------------------------------------------------------------------------------------------------------------------------------------|----------|---------|------------|
| 5   | ENSG00000145826.1  | "Leukocyte cell-derived chemotaxin 2 precursor (hLECT2). [Source:SWISSPROT;Acc:O14960]"                                                                                                                                                        | same     | 22655   | 5.44476    |
| 5   | ENSG00000145908.2  | "Zinc finger protein 300. [Source:SWISSPROT;Acc:Q96RE9]"                                                                                                                                                                                       | same     | 22721   | 1.90176    |
| 5   | ENSG00000150712.2  | "phosphatidylinositol-3 phosphate 3-phosphatase adaptor subunit; 3-phosphatase adapter subunit. [Source:RefSeq;Acc:NM_019061]"                                                                                                                 | opposite | 20127   | 7.62162    |
| 5   | ENSG00000154162.2  | Brain-cadherin precursor (BR-cadherin) (Cadherin-12) (N-cadherin 2) (Cadherin                                                                                                                                                                  | opposite | 19829   | 3.81758    |
| 5   |                    |                                                                                                                                                                                                                                                |          | 19831   | 4.32794    |
| 5   | ENSG00000156475.4  | Serine/threonine protein phosphatase 2A                                                                                                                                                                                                        | opposite | 21097   | 11.9549    |
| 5   | ENSG00000158987.5  | "PDZ domain containing guanine nucleotide exchange factor 2 (PDZ-GEF2) (Rap guanine nucleotide exchange factor) (RA-GEF-2). [Source:SWISSPROT;Acc:Q8TEU7]"                                                                                     | opposite | 21049   | 21.5737    |
| 5   |                    |                                                                                                                                                                                                                                                |          | 21050   | 19.8881    |
| 5   | ENSG00000164197.2  | (blank)                                                                                                                                                                                                                                        | opposite | 21982   | 4.33847    |
| 5   | ENSG00000168690.3  | (blank)                                                                                                                                                                                                                                        | opposite | 21766   | 7.13479    |
| 5   | ENSG00000169302.3  | (blank)                                                                                                                                                                                                                                        | opposite | 22702   | 5.37372    |
| 5   | ENSG00000169570.1  | (blank)                                                                                                                                                                                                                                        | same     | 22528   | 12.0932    |
| 5   | ENSG00000170624.2  | "Delta-sarcoglycan (SG-delta) (35 kDa dystrophin-associated glycoprotein) (35DAG). [Source:SWISSPROT;Acc:Q92629]"                                                                                                                              | opposite | 22748   | 22.1336    |
| 5   | ENSG00000171643.3  | "S-100Z protein. [Source:SWISSPROT;Acc:Q8WXG8]"                                                                                                                                                                                                | same     | 20442   | 19.9269    |
| 5   |                    |                                                                                                                                                                                                                                                | opposite | 22058   | 14.9631    |
| 5   | ENSG00000174705.2  | (blank)                                                                                                                                                                                                                                        | opposite | 21224   | 16.022     |
| 5   | ENSG00000177876.2  | "similar to ADAMTS-10 precursor. [Source:RefSeq;Acc:NM_197941]"                                                                                                                                                                                | opposite | 20381   | 9.40957    |
| 5   | ENSG00000183613.3  | (blank)                                                                                                                                                                                                                                        | same     | 20442   | 19.9269    |
| 5   |                    |                                                                                                                                                                                                                                                | opposite | 22058   | 14.9631    |
| 6   | ENSG00000008083.2  | "Jumonji protein. [Source:SWISSPROT;Acc:Q92833]"                                                                                                                                                                                               | same     | 22911   | 3.85434    |
| 6   | ENSG000000055291.5 | "CMP-sialic acid transporter (CMP-Sia-Tr) (CMP-SA-Tr) (Solute carrier family 35 member A1). [Source:SWISSPROT;Acc:P78382]"                                                                                                                     | opposite | 24866   | 6.40089    |
| 6   | ENSG000000057663.3 | "Autophagy protein 5-like (APG5-like) (Apoptosis-specific protein). [Source:SWISSPROT;Acc:Q9H1Y0]"                                                                                                                                             | opposite | 23791   | 13.8413    |
| 6   | ENSG000000064999.4 | "Ankyrin repeat and SAM domain containing protein 1. [Source:SWISSPROT;Acc:Q92625]"                                                                                                                                                            | same     | 23029   | 7.83894    |
| 6   | ENSG000000065833.1 | "NADP-dependent malic enzyme (EC 1.1.1.40) (NADP-ME) (Malic enzyme 1). [Source:SWISSPROT;Acc:P48163]"                                                                                                                                          | opposite | 23511   | 7.10483    |
| 6   |                    |                                                                                                                                                                                                                                                |          | 23512   | 5.6475     |
| 6   | ENSG00000079841.4  | "Regulating synaptic membrane exocytosis protein 1 (Rab3-interacting molecule 1) (RIM 1). [Source:SWISSPROT;Acc:Q86UR5]"                                                                                                                       | opposite | 24708   | 6.79388    |
| 6   |                    |                                                                                                                                                                                                                                                |          | 24709   | 2.21122    |
| 6   | ENSG000000082269.3 | (blank)                                                                                                                                                                                                                                        | opposite | 24688   | 8.96813    |
| 6   | ENSG000000082293.2 | "Collagen alpha 1(XIX) chain precursor (Collagen alpha 1(Y) chain). [Source:SWISSPROT;Acc:Q14993]"                                                                                                                                             | opposite | 24682   | 5.48232    |
| 6   | ENSG000000083123.2 | 2-oxoisovalerate dehydrogenase beta subunit                                                                                                                                                                                                    | opposite | 24790   | 2.78744    |
| 6   | ENSG000000091831.5 | "Estrogen receptor (ER) (Estradiol receptor) (ER-alpha). [Source:SWISSPROT;Acc:P03372]"                                                                                                                                                        | opposite | 25354   | 6.38114    |
| 6   | ENSG000000096654.5 | "Zinc finger protein 184. [Source:SWISSPROT;Acc:Q99676]"                                                                                                                                                                                       | same     | 24315   | 3.16528    |
| 6   | ENSG00000111880.3  | "mRNA capping enzyme (HCE) (HCAP1) [Includes: Polynucleotide 5'- triphosphatase (EC 3.1.3.33) (mRNA 5'-triphosphatase) (TPase); mRNA guanylyltransferase (EC 2.7.7.50) (GTP--RNA guanylyltransferase) (GTase)]. [Source:SWISSPROT;Acc:O60942]" | opposite | 23549   | 25.6829    |
| 6   |                    |                                                                                                                                                                                                                                                |          | 23552   | 6.13468    |
| 6   | ENSG00000111981.1  | "UL16 binding protein 1; alcan-beta. [Source:RefSeq;Acc:NM_025218]"                                                                                                                                                                            | opposite | 25348   | 1.66339    |
| 6   | ENSG00000112038.4  | "Mu-type opioid receptor (MOR-1). [Source:SWISSPROT;Acc:P35372]"                                                                                                                                                                               | opposite | 25379   | 1.89526    |
| 6   | ENSG00000112175.1  | "Bone morphogenetic protein 5 precursor (BMP-5). [Source:SWISSPROT;Acc:P22003]"                                                                                                                                                                | opposite | 23155   | 2.21057    |
| 6   | ENSG00000112232.2  | KH domain-containing                                                                                                                                                                                                                           | opposite | 23192   | 6.63653    |
| 6   | ENSG00000112304.1  | "Thioesterase superfamily member 2 (PNAS-27) (HT012). [Source:SWISSPROT;Acc:Q9NPJ3]"                                                                                                                                                           | opposite | 24298   | 12.139     |
| 6   | ENSG00000112319.5  | "Eyes absent homolog 4. [Source:SWISSPROT;Acc:O95677]"                                                                                                                                                                                         | opposite | 25192   | 5.09279    |
| 6   | ENSG00000112394.3  | solute carrier family 16                                                                                                                                                                                                                       | same     | 23819   | 17.2185    |
| 6   | ENSG00000112499.2  | "solute carrier family 22 member 2 isoform a; organic cation transporter 2. [Source:RefSeq;Acc:NM_003058]"                                                                                                                                     | opposite | 24110   | 10.6709    |

| Chr | Ensembl id        | Description                                                                                                                                       | Strand   | HERV id | HERV score |
|-----|-------------------|---------------------------------------------------------------------------------------------------------------------------------------------------|----------|---------|------------|
| 6   | ENSG00000112541.2 | cAMP and cAMP-inhibited cGMP 3'                                                                                                                   | opposite | 24158   | 24.0437    |
| 6   |                   |                                                                                                                                                   |          | 24161   | 7.16288    |
| 6   | ENSG00000112837.3 | "T-box transcription factor TBX18 (T-box protein 18) (Fragment). [Source:SWISSPROT;Acc:O95935]"                                                   | same     | 24844   | 22.6399    |
| 6   | ENSG00000118420.3 | (blank)                                                                                                                                           | same     | 24831   | 6.08716    |
| 6   | ENSG00000118492.3 | (blank)                                                                                                                                           | opposite | 25329   | 17.778     |
| 6   | ENSG00000124721.4 | dynein                                                                                                                                            | same     | 23037   | 3.33901    |
| 6   | ENSG00000124788.3 | "Ataxin-1 (Spinocerebellar ataxia type 1 protein). [Source:SWISSPROT;Acc:P54253]"                                                                 | opposite | 22918   | 22.2462    |
| 6   | ENSG00000135298.2 | "Brain-specific angiogenesis inhibitor 3 precursor. [Source:SWISSPROT;Acc:O60242]"                                                                | opposite | 24673   | 5.90736    |
| 6   | ENSG00000135338.1 | (blank)                                                                                                                                           | opposite | 23481   | 4.71476    |
| 6   | ENSG00000137198.1 | "GMP reductase 1 (EC 1.7.1.7) (Guanosine 5'-monophosphate oxidoreductase 1) (Guanosine monophosphate reductase 1). [Source:SWISSPROT;Acc:P36959]" | opposite | 24250   | 11.6209    |
| 6   | ENSG00000145982.1 | "phenylalanine-tRNA synthetase. [Source:RefSeq;Acc:NM_006567]"                                                                                    | opposite | 24210   | 7.84594    |
| 6   | ENSG00000146085.1 | Methylmalonyl-CoA mutase                                                                                                                          | same     | 24405   | 5.64535    |
| 6   | ENSG00000146350.2 | (blank)                                                                                                                                           | opposite | 23864   | 3.44026    |
| 6   |                   |                                                                                                                                                   |          | 23866   | 5.32362    |
| 6   |                   |                                                                                                                                                   |          | 23867   | 3.68897    |
| 6   | ENSG00000146416.3 | "androgen-induced 1; CGI-103 protein; androgen induced protein. [Source:RefSeq;Acc:NM_016108]"                                                    | opposite | 25300   | 23.2016    |
| 6   | ENSG00000164483.4 | "sterile alpha motif domain containing 3. [Source:RefSeq;Acc:NM_152552]"                                                                          | opposite | 23931   | 12.2658    |
| 6   | ENSG00000164485.3 | "interleukin 22-binding protein isoform 1; class II cytokine receptor; interleukin 22-binding protein. [Source:RefSeq;Acc:NM_052962]"             | opposite | 23960   | 13.9085    |
| 6   | ENSG00000164494.1 | "candidate tumor suppressor protein. [Source:RefSeq;Acc:NM_020381]"                                                                               | opposite | 23799   | 8.10699    |
| 6   | ENSG00000164711.5 | lipoprotein                                                                                                                                       | same     | 25422   | 6.10274    |
| 6   | ENSG00000166308.2 | "Complement C4 precursor [Contains: C4a anaphylatoxin]. [Source:SWISSPROT;Acc:P01028]"                                                            | opposite | 24345   | 15.1219    |
| 6   | ENSG00000168379.1 | Similar to major histocompatibility complex                                                                                                       | opposite | 24352   | 4.98349    |
| 6   | ENSG00000168415.5 | HLA class II histocompatibility antigen                                                                                                           | same     | 24347   | 19.2147    |
| 6   |                   |                                                                                                                                                   |          | 24349   | 22.8568    |
| 6   |                   |                                                                                                                                                   | opposite | 23022   | 7.56738    |
| 6   |                   |                                                                                                                                                   |          | 23024   | 8.80626    |
| 6   |                   |                                                                                                                                                   |          | 23025   | 2.40072    |
| 6   | ENSG00000168745.5 | HLA class I histocompatibility antigen                                                                                                            | same     | 23011   | 4.25765    |
| 6   |                   |                                                                                                                                                   |          | 23012   | 4.64502    |
| 6   |                   |                                                                                                                                                   |          | 23013   | 2.88173    |
| 6   | ENSG00000170927.3 | "Polycystic kidney and hepatic disease 1 precursor (Fibrocystin) (Polyductin) (Tigmin). [Source:SWISSPROT;Acc:Q8TCZ9]"                            | opposite | 23113   | 11.3327    |
| 6   | ENSG00000172245.3 | "Laminin alpha-2 chain precursor (Laminin M chain) (Merosin heavy chain). [Source:SWISSPROT;Acc:P24043]"                                          | opposite | 25185   | 5.49531    |
| 6   | ENSG00000172673.1 | (blank)                                                                                                                                           | opposite | 23919   | 5.08928    |
| 6   | ENSG00000181126.3 | (blank)                                                                                                                                           | same     | 23004   | 3.56256    |
| 6   | ENSG00000181355.5 | "MRDS1; orofacial clefting chromosomal breakpoint region 1. [Source:RefSeq;Acc:NM_153003]"                                                        | opposite | 22896   | 7.61071    |
| 6   | ENSG00000187200.3 | HLA class I histocompatibility antigen                                                                                                            | same     | 24340   | 3.92316    |
| 6   |                   |                                                                                                                                                   |          | 24341   | 12.0823    |
| 6   | ENSG00000187888.1 | HLA class I histocompatibility antigen                                                                                                            | same     | 23006   | 2.47945    |
| 6   |                   |                                                                                                                                                   |          | 23007   | 4.17422    |
| 6   |                   |                                                                                                                                                   |          | 23008   | 2.74376    |
| 6   | ENSG00000188107.1 | EGF-like-domain                                                                                                                                   | same     | 24549   | 3.04196    |
| 7   | ENSG00000004866.5 | "suppression of tumorigenicity 7 isoform a; family with sequence similarity 4"                                                                    | opposite | 27442   | 3.71664    |
| 7   | ENSG00000005108.1 | (blank)                                                                                                                                           | opposite | 25553   | 9.46663    |

| Chr | Ensembl id        | Description                                                                                                                                                                                                                                                        | Strand   | HERV id | HERV score |
|-----|-------------------|--------------------------------------------------------------------------------------------------------------------------------------------------------------------------------------------------------------------------------------------------------------------|----------|---------|------------|
| 7   | ENSG00000005249.1 | "cAMP-dependent protein kinase type II-beta regulatory chain. [Source:SWISSPROT;Acc:P31323]"                                                                                                                                                                       | opposite | 27345   | 5.40119    |
| 7   | ENSG00000006530.4 | (blank)                                                                                                                                                                                                                                                            | opposite | 27624   | 21.179     |
| 7   | ENSG00000006576.5 | "putative homeodomain transcription factor 2. [Source:RefSeq;Acc:NM_020432]"                                                                                                                                                                                       | opposite | 27153   | 4.35977    |
| 7   | ENSG00000006747.4 | "Adseverin (Scinderin). [Source:SWISSPROT;Acc:Q9Y6U3]"                                                                                                                                                                                                             | opposite | 26750   | 23.5158    |
| 7   | ENSG00000021461.5 | "Cytochrome P450 3A43 (EC 1.14.14.1). [Source:SWISSPROT;Acc:Q9HB55]"                                                                                                                                                                                               | opposite | 27316   | 8.6618     |
| 7   | ENSG00000042813.1 | "zona pellucida binding protein. [Source:RefSeq;Acc:NM_007009]"                                                                                                                                                                                                    | same     | 26989   | 3.89079    |
| 7   |                   |                                                                                                                                                                                                                                                                    |          | 26991   | 12.9578    |
| 7   |                   |                                                                                                                                                                                                                                                                    |          | 26992   | 8.49626    |
| 7   | ENSG00000064419.4 | "transportin 3; transportin-SR; importin 12. [Source:RefSeq;Acc:NM_012470]"                                                                                                                                                                                        | opposite | 26497   | 3.26962    |
| 7   | ENSG00000081803.3 | "Ca2+-dependent activator protein for secretion 2. [Source:RefSeq;Acc:NM_017954]"                                                                                                                                                                                  | opposite | 26444   | 11.4296    |
| 7   | ENSG00000091129.4 | "Neuronal cell adhesion molecule precursor (Nr-CAM) (NgCAM-related cell adhesion molecule) (Ng-CAM-related) (hBravo). [Source:SWISSPROT;Acc:Q92823]"                                                                                                               | opposite | 26269   | 21.1256    |
| 7   | ENSG00000105778.4 | (blank)                                                                                                                                                                                                                                                            | same     | 25700   | 15.5747    |
| 7   |                   |                                                                                                                                                                                                                                                                    | opposite | 26858   | 9.76771    |
| 7   | ENSG00000105866.1 | "Transcription factor Sp4 (SPR-1). [Source:SWISSPROT;Acc:Q02446]"                                                                                                                                                                                                  | opposite | 26818   | 17.5288    |
| 7   | ENSG00000105894.2 | "Pleiotrophin precursor (PTN) (Heparin-binding growth-associated molecule) (HB-GAM) (Heparin-binding growth factor 8) (HBGF-8) (Osteoblast specific factor 1) (OSF-1) (Heparin-binding neurite outgrowth promoting factor 1) (HBNF-1). [Source:SWISSPROT;Acc:P21]" | same     | 27608   | 8.8904     |
| 7   | ENSG00000105983.5 | "limb region 1 protein; limb region 1. [Source:RefSeq;Acc:NM_022458]"                                                                                                                                                                                              | opposite | 26635   | 6.47376    |
| 7   | ENSG00000106078.5 | "cordon-bleu homolog. [Source:RefSeq;Acc:NM_015198]"                                                                                                                                                                                                               | opposite | 25833   | 3.75062    |
| 7   | ENSG00000106121.2 | (blank)                                                                                                                                                                                                                                                            | same     | 25695   | 5.76909    |
| 7   | ENSG00000106580.3 | "Aldo-keto reductase family 1 member B10 (EC 1.1.1.-) (Aldose reductase-like) (ARL-1) (Small intestine reductase) (SI reductase) (Aldose reductase-related protein) (ARP) (hARP). [Source:SWISSPROT;Acc:O60218]"                                                   | same     | 26511   | 22.4133    |
| 7   |                   |                                                                                                                                                                                                                                                                    |          | 26513   | 31.5306    |
| 7   | ENSG00000122779.3 | "Transcription intermediary factor 1-alpha (TIF1-alpha) (Tripartite motif protein 24). [Source:SWISSPROT;Acc:O15164]"                                                                                                                                              | opposite | 27619   | 18.8536    |
| 7   | ENSG00000128510.1 | "Carboxypeptidase A4 precursor (EC 3.4.17.-) (Carboxypeptidase A3). [Source:SWISSPROT;Acc:Q9U142]"                                                                                                                                                                 | opposite | 27563   | 8.37878    |
| 7   | ENSG00000128512.4 | "Dedicator of cytokinesis protein 4. [Source:SWISSPROT;Acc:Q8N110]"                                                                                                                                                                                                | opposite | 26316   | 5.45767    |
| 7   | ENSG00000128578.1 | (blank)                                                                                                                                                                                                                                                            | opposite | 27560   | 7.65164    |
| 7   | ENSG00000130226.5 | "Dipeptidyl aminopeptidase-like protein 6 (Dipeptidylpeptidase VI) (Dipeptidylpeptidase 6) (Dipeptidyl peptidase IV like protein) (Dipeptidyl aminopeptidase-related protein) (DPPX). [Source:SWISSPROT;Acc:P42658]"                                               | same     | 26629   | 10.2551    |
| 7   |                   |                                                                                                                                                                                                                                                                    |          | 26630   | 30.0881    |
| 7   |                   |                                                                                                                                                                                                                                                                    |          | 26631   | 22.5835    |
| 7   | ENSG00000131558.3 | "Exocyst complex component Sec8. [Source:SWISSPROT;Acc:Q96A65]"                                                                                                                                                                                                    | opposite | 27580   | 3.34927    |
| 7   | ENSG00000136261.4 | "basic leucine zipper and W2 domains 2; HSPC028 protein. [Source:RefSeq;Acc:NM_014038]"                                                                                                                                                                            | opposite | 26797   | 5.66235    |
| 7   | ENSG00000136267.3 | Diacylglycerol kinase                                                                                                                                                                                                                                              | opposite | 25607   | 4.47859    |
| 7   |                   |                                                                                                                                                                                                                                                                    |          | 25609   | 3.55035    |
| 7   | ENSG00000146856.3 | (blank)                                                                                                                                                                                                                                                            | opposite | 27585   | 1.68046    |
| 7   | ENSG00000150851.3 | (blank)                                                                                                                                                                                                                                                            | same     | 25685   | 12.4997    |
| 7   | ENSG00000152926.2 | "Zinc finger protein 117 (Zinc finger protein HPF9) (Fragment). [Source:SWISSPROT;Acc:Q03924]"                                                                                                                                                                     | same     | 27110   | 22.7965    |
| 7   | ENSG00000154438.1 | Germ cell-specific ankyrin                                                                                                                                                                                                                                         | same     | 27443   | 2.18552    |
| 7   | ENSG00000155093.3 | "Receptor-type protein-tyrosine phosphatase N2 precursor (EC 3.1.3.48) (R-PTP-N2) (Islet cell autoantigen related protein) (ICAAR) (IAR) (Phogrin). [Source:SWISSPROT;Acc:Q92932]"                                                                                 | opposite | 26641   | 4.64363    |
| 7   | ENSG00000155849.3 | "Engulfment and cell motility protein 1 (CED-12 homolog). [Source:SWISSPROT;Acc:Q92556]"                                                                                                                                                                           | same     | 26891   | 2.55425    |
| 7   | ENSG00000157680.3 | Diacylglycerol kinase                                                                                                                                                                                                                                              | opposite | 26526   | 4.16257    |
| 7   | ENSG00000157764.2 | "B-Raf proto-oncogene serine/threonine-protein kinase (EC 2.7.1.37) (p94) (v-Raf murine sarcoma viral oncogene homolog B1).                                                                                                                                        | opposite | 26546   | 17.0299    |

| Chr | Ensembl id        | Description                                                                                                                                                                                                    | Strand   | HERV id | HERV score |
|-----|-------------------|----------------------------------------------------------------------------------------------------------------------------------------------------------------------------------------------------------------|----------|---------|------------|
|     |                   | [Source:SWISSPROT;Acc:P15056]"                                                                                                                                                                                 |          |         |            |
| 7   |                   |                                                                                                                                                                                                                |          | 26547   | 9.84384    |
| 7   | ENSG00000160870.3 | "Cytochrome P450 3A7 (EC 1.14.14.1) (CYP11A7) (P450-HFLA). [Source:SWISSPROT;Acc:P24462]"                                                                                                                      | opposite | 26234   | 18.8358    |
| 7   | ENSG00000161040.3 | "F-box and leucine-rich repeat protein 13. [Source:RefSeq;Acc:NM_145032]"                                                                                                                                      | opposite | 26241   | 9.80135    |
| 7   | ENSG00000164597.3 | "Conserved oligomeric Golgi complex subunit 5 (13S Golgi transport complex 90 kDa subunit) (GTC-90) (Golgi transport complex 1). [Source:SWISSPROT;Acc:Q9UP83]"                                                | opposite | 26262   | 9.52303    |
| 7   |                   |                                                                                                                                                                                                                |          | 26263   | 6.92757    |
| 7   | ENSG00000170381.1 | "Semaphorin 3E precursor. [Source:SWISSPROT;Acc:O15041]"                                                                                                                                                       | opposite | 26095   | 12.0578    |
| 7   | ENSG00000171082.4 | (blank)                                                                                                                                                                                                        | opposite | 27633   | 5.85162    |
| 7   | ENSG00000171115.1 | "immune associated nucleotide 6; immune associated nucleotide. [Source:RefSeq;Acc:NM_175571]"                                                                                                                  | opposite | 27705   | 4.42642    |
| 7   | ENSG00000174469.4 | "Contactin associated protein-like 2 precursor (Cell recognition molecule Caspr2). [Source:SWISSPROT;Acc:Q9UHC6]"                                                                                              | opposite | 27674   | 11.1748    |
| 7   |                   |                                                                                                                                                                                                                |          | 27676   | 3.48584    |
| 7   |                   |                                                                                                                                                                                                                |          | 27694   | 11.4106    |
| 7   | ENSG00000175600.3 | (blank)                                                                                                                                                                                                        | opposite | 26908   | 7.82823    |
| 7   |                   |                                                                                                                                                                                                                |          | 26910   | 6.35069    |
| 7   | ENSG00000178234.1 | "GALNAC-T11. [Source:RefSeq;Acc:NM_022087]"                                                                                                                                                                    | opposite | 27721   | 15.8902    |
| 7   |                   |                                                                                                                                                                                                                |          | 27722   | 20.3266    |
| 7   | ENSG00000179603.5 | "Metabotropic glutamate receptor 8 precursor (mGluR8). [Source:SWISSPROT;Acc:O00222]"                                                                                                                          | same     | 27559   | 4.98622    |
| 7   |                   |                                                                                                                                                                                                                | opposite | 26489   | 5.00248    |
| 7   |                   |                                                                                                                                                                                                                |          | 26491   | 3.08258    |
| 7   |                   |                                                                                                                                                                                                                |          | 26493   | 4.02754    |
| 7   | ENSG00000181342.4 | "Zinc finger protein ZFD25. [Source:SWISSPROT;Acc:Q9UII5]"                                                                                                                                                     | same     | 25944   | 5.46201    |
| 7   |                   |                                                                                                                                                                                                                |          | 25954   | 4.31886    |
| 7   |                   |                                                                                                                                                                                                                |          | 25956   | 20.0229    |
| 7   |                   |                                                                                                                                                                                                                | opposite | 27104   | 9.87238    |
| 7   |                   |                                                                                                                                                                                                                |          | 27106   | 5.07642    |
| 7   | ENSG00000181444.3 | (blank)                                                                                                                                                                                                        | same     | 27697   | 23.9546    |
| 7   |                   |                                                                                                                                                                                                                | opposite | 26615   | 9.16076    |
| 7   |                   |                                                                                                                                                                                                                |          | 26616   | 5.09041    |
| 7   | ENSG00000182165.3 | "TP53 activated protein 1; TP53 target gene 1; H_RG012D21.9. [Source:RefSeq;Acc:NM_007233]"                                                                                                                    | same     | 27237   | 9.01983    |
| 7   | ENSG00000184903.1 | "IMP2 inner mitochondrial membrane protease-like; inner mitochondrial membrane peptidase 2 like. [Source:RefSeq;Acc:NM_032549]"                                                                                | opposite | 26310   | 2.95194    |
| 7   |                   |                                                                                                                                                                                                                |          | 26312   | 4.96618    |
| 7   | ENSG00000186088.1 | (blank)                                                                                                                                                                                                        | opposite | 26005   | 13.1048    |
| 7   | ENSG00000187416.1 | "lipoma HMGIC fusion partner-like 3. [Source:RefSeq;Acc:NM_199000]"                                                                                                                                            | same     | 26251   | 7.14168    |
| 7   | ENSG00000188883.1 | (blank)                                                                                                                                                                                                        | opposite | 26544   | 10.7007    |
| 8   | ENSG00000036565.3 | "Chromaffin granule amine transporter (Vesicular amine transporter 1) (VAT1) (Solute carrier family 18 member 1). [Source:SWISSPROT;Acc:P54219]"                                                               | opposite | 27898   | 7.31088    |
| 8   | ENSG00000047249.4 | "Vacuolar ATP synthase subunit H (EC 3.6.3.14) (V-ATPase H subunit) (Vacuolar proton pump H subunit) (V-ATPase 50/57 kDa subunits) (Vacuolar proton pump subunit SFD) (CGI-11). [Source:SWISSPROT;Acc:Q9UI12]" | opposite | 28144   | 25.7311    |
| 8   | ENSG00000078674.4 | "pericentriolar material 1. [Source:RefSeq;Acc:NM_006197]"                                                                                                                                                     | same     | 27885   | 2.42408    |
| 8   | ENSG00000104205.3 | "Serine/threonine-protein kinase Sgk3 (EC 2.7.1.37) (Serum/glucocorticoid regulated kinase 3) (Serum/glucocorticoid regulated kinase-like). [Source:SWISSPROT;Acc:Q96BR1]"                                     | opposite | 29453   | 4.09369    |
| 8   | ENSG00000104324.5 | "plasma glutamate carboxypeptidase; aminopeptidase. [Source:RefSeq;Acc:NM_016134]"                                                                                                                             | opposite | 29865   | 4.26016    |
| 8   | ENSG00000104341.3 | "lysosomal-associated transmembrane protein 4 beta; putative integral membrane transporter. [Source:RefSeq;Acc:NM_018407]"                                                                                     | opposite | 29866   | 14.4396    |

| Chr | Ensembl id        | Description                                                                                                                                                                                                                                                  | Strand   | HERV id | HERV score |
|-----|-------------------|--------------------------------------------------------------------------------------------------------------------------------------------------------------------------------------------------------------------------------------------------------------|----------|---------|------------|
| 8   | ENSG00000104369.1 | "Junctophilin 1 (Junctophilin type 1) (JP-1). [Source:SWISSPROT;Acc:Q9HDC5]"                                                                                                                                                                                 | opposite | 28290   | 6.3037     |
| 8   | ENSG00000104375.4 | "Serine/threonine protein kinase 3 (EC 2.7.1.37) (STE20-like kinase MST2) (MST-2) (Mammalian STE20-like protein kinase 2) (Serine/threonine protein kinase Krs-1). [Source:SWISSPROT;Acc:Q13188]"                                                            | opposite | 28588   | 8.90707    |
| 8   | ENSG00000104450.3 | "sperm associated antigen 1; infertility-related sperm protein; TPR-containing protein involved in spermatogenesis; tetratricopeptide repeat-containing protein. [Source:RefSeq;Acc:NM_003114]"                                                              | same     | 28600   | 5.35593    |
| 8   | ENSG00000104490.5 | "Neurocalcin delta. [Source:SWISSPROT;Acc:P29554]"                                                                                                                                                                                                           | opposite | 28601   | 5.14652    |
| 8   | ENSG00000104755.3 | "ADAM 2 precursor (A disintegrin and metalloproteinase domain 2) (Fertilin beta subunit) (PH-30) (PH30). [Source:SWISSPROT;Acc:Q99965]"                                                                                                                      | opposite | 27981   | 4.38536    |
| 8   |                   |                                                                                                                                                                                                                                                              |          | 27985   | 1.06869    |
| 8   | ENSG00000120526.4 | "chronic myelogenous leukemia tumor antigen 66. [Source:RefSeq;Acc:NM_032869]"                                                                                                                                                                               | opposite | 28656   | 10.92      |
| 8   | ENSG00000120889.1 | "Tumor necrosis factor receptor superfamily member 10B precursor (Death receptor 5) (TNF-related apoptosis-inducing ligand receptor 2) (TRAIL receptor-2) (TRAIL-R2). [Source:SWISSPROT;Acc:O14763]"                                                         | opposite | 27905   | 3.9208     |
| 8   | ENSG00000120915.2 | "Soluble epoxide hydrolase (SEH) (EC 3.3.2.3) (Epoxide hydratase) (Cytosolic epoxide hydrolase) (CEH). [Source:SWISSPROT;Acc:P34913]"                                                                                                                        | opposite | 29128   | 26.5239    |
| 8   | ENSG00000120992.4 | "Acyl-protein thioesterase 1 (EC 3.1.2.-) (Lysophospholipase 1). [Source:SWISSPROT;Acc:O75608]"                                                                                                                                                              | opposite | 28149   | 12.0838    |
| 8   | ENSG00000132549.3 | "Cohen syndrome 1 protein isoform 5. [Source:RefSeq;Acc:NM_017890]"                                                                                                                                                                                          | opposite | 29871   | 8.86195    |
| 8   | ENSG00000134013.2 | "Lysyl oxidase homolog 2 precursor (EC 1.4.3.-) (Lysyl oxidase-like protein 2) (Lysyl oxidase related protein 2) (Lysyl oxidase-related protein WS9-14). [Source:SWISSPROT;Acc:Q9Y4K0]"                                                                      | same     | 29111   | 3.71506    |
| 8   | ENSG00000134028.3 | ADAM-like                                                                                                                                                                                                                                                    | opposite | 29117   | 1.93177    |
| 8   | ENSG00000147481.2 | "Gamma-1-syntrophin (G1SYN) (Syntrophin 4) (SYN4). [Source:SWISSPROT;Acc:Q9NSN8]"                                                                                                                                                                            | same     | 28082   | 4.07358    |
| 8   |                   |                                                                                                                                                                                                                                                              | opposite | 29297   | 4.49195    |
| 8   |                   |                                                                                                                                                                                                                                                              |          | 29302   | 4.66219    |
| 8   | ENSG00000147488.3 | "suppression of tumorigenicity 18; zinc finger protein 387. [Source:RefSeq;Acc:NM_014682]"                                                                                                                                                                   | opposite | 28116   | 4.68985    |
| 8   | ENSG00000147676.3 | "MAL2 protein. [Source:SWISSPROT;Acc:Q969L2]"                                                                                                                                                                                                                | opposite | 30135   | 2.8561     |
| 8   | ENSG00000155792.1 | "DEP domain containing 6. [Source:RefSeq;Acc:NM_022783]"                                                                                                                                                                                                     | opposite | 30138   | 20.3578    |
| 8   | ENSG00000156006.1 | Arylamine N-acetyltransferase 2 (EC 2.3.1.5) (Arylamide acetylase 2) (Arylamine N-acetyltransferase                                                                                                                                                          | opposite | 29095   | 8.4984     |
| 8   | ENSG00000158669.2 | "putative lysophosphatidic acid acyltransferase. [Source:RefSeq;Acc:NM_178819]"                                                                                                                                                                              | opposite | 29235   | 8.1537     |
| 8   | ENSG00000164793.4 | "fibrocystin L; polycystic kidney and hepatic disease-like 1. [Source:RefSeq;Acc:NM_177531]"                                                                                                                                                                 | opposite | 29947   | 3.78859    |
| 8   | ENSG00000165078.1 | "Carboxypeptidase A6 precursor (EC 3.4.17.1) (Carboxypeptidase B). [Source:SWISSPROT;Acc:Q8N4T0]"                                                                                                                                                            | opposite | 28245   | 4.58671    |
| 8   | ENSG00000168077.3 | scavenger receptor class A                                                                                                                                                                                                                                   | opposite | 29130   | 5.19136    |
| 8   | ENSG00000168615.2 | "ADAM 9 precursor (EC 3.4.24.-) (A disintegrin and metalloproteinase domain 9) (Cellular disintegrin-related protein) (Metalloprotease/disintegrin/cysteine-rich protein 9) (Myeloma cell metalloproteinase) (Meltrin gamma). [Source:SWISSPROT;Acc:Q13443]" | opposite | 29193   | 2.99004    |
| 8   |                   |                                                                                                                                                                                                                                                              |          | 29194   | 2.49671    |
| 8   | ENSG00000168619.5 | ADAM 18 precursor (A disintegrin and metalloproteinase domain 18) (Transmembrane metalloproteinase-like                                                                                                                                                      | same     | 27979   | 4.41349    |
| 8   |                   |                                                                                                                                                                                                                                                              |          | 27981   | 4.38536    |
| 8   |                   |                                                                                                                                                                                                                                                              |          | 27985   | 1.06869    |
| 8   |                   |                                                                                                                                                                                                                                                              | opposite | 29208   | 4.0596     |
| 8   | ENSG00000170631.4 | "Zinc finger protein clone 647. [Source:SWISSPROT;Acc:P15622]"                                                                                                                                                                                               | same     | 30267   | 12.3908    |
| 8   |                   |                                                                                                                                                                                                                                                              |          | 30271   | 16.7278    |
| 8   |                   |                                                                                                                                                                                                                                                              | opposite | 28959   | 12.6403    |
| 8   | ENSG00000171428.3 | Arylamine N-acetyltransferase 1 (EC 2.3.1.5) (Arylamide acetylase 1) (Arylamine N-acetyltransferase                                                                                                                                                          | opposite | 29086   | 21.554     |
| 8   | ENSG00000172817.1 | "Cytochrome P450 7B1 (Oxysterol 7-alpha-hydroxylase) (EC 1.14.13.-). [Source:SWISSPROT;Acc:O75881]"                                                                                                                                                          | opposite | 28233   | 5.18156    |
| 8   | ENSG00000176406.5 | "Regulating synaptic membrane exocytosis protein 2 (Rab3-interacting molecule 2) (RIM 2). [Source:SWISSPROT;Acc:Q9UQ26]"                                                                                                                                     | opposite | 29887   | 2.32156    |

| Chr | Ensembl id        | Description                                                                                                                                                                       | Strand   | HERV id | HERV score |
|-----|-------------------|-----------------------------------------------------------------------------------------------------------------------------------------------------------------------------------|----------|---------|------------|
| 8   |                   |                                                                                                                                                                                   |          | 29889   | 2.44209    |
| 8   | ENSG00000176571.2 | (blank)                                                                                                                                                                           | opposite | 29743   | 14.5811    |
| 8   |                   |                                                                                                                                                                                   |          | 29746   | 4.78187    |
| 8   |                   |                                                                                                                                                                                   |          | 29750   | 10.5316    |
| 8   |                   |                                                                                                                                                                                   |          | 29752   | 3.0665     |
| 8   | ENSG00000177306.2 | "Seven transmembrane helix receptor. [Source:SPTREMBL;Acc:Q8NHA1]"                                                                                                                | same     | 29010   | 35.1194    |
| 8   | ENSG00000177335.1 | (blank)                                                                                                                                                                           | same     | 28952   | 4.01069    |
| 8   |                   |                                                                                                                                                                                   |          | 28953   | 6.1786     |
| 8   | ENSG00000178764.1 | "zinc fingers and homeoboxes 2; transcription factor ZHX2. [Source:RefSeq;Acc:NM_014943]"                                                                                         | opposite | 30148   | 24.661     |
| 8   | ENSG00000182319.1 | (blank)                                                                                                                                                                           | same     | 29024   | 5.56838    |
| 8   | ENSG00000185015.1 | "Carbonic anhydrase XIII (EC 4.2.1.1) (Carbonate dehydratase XIII) (CA- XIII). [Source:SWISSPROT;Acc:Q8N1Q1]"                                                                     | opposite | 29731   | 5.9315     |
| 8   | ENSG00000185053.1 | "Zeta-sarcoglycan (Zeta-SG) (ZSG1). [Source:SWISSPROT;Acc:Q96LD1]"                                                                                                                | opposite | 27838   | 2.55127    |
| 8   | ENSG00000185942.1 | (blank)                                                                                                                                                                           | opposite | 29415   | 16.5472    |
| 9   | ENSG0000023318.3  | "Thioredoxin domain containing protein 4 precursor (Endoplasmic reticulum protein ERp44). [Source:SWISSPROT;Acc:Q9BS26]"                                                          | opposite | 30839   | 10.9767    |
| 9   | ENSG0000029402.2  | (blank)                                                                                                                                                                           | opposite | 31503   | 4.71994    |
| 9   | ENSG0000078725.1  | "deleted in bladder cancer 1; deleted in bladder cancer chromosome region candidate 1. [Source:RefSeq;Acc:NM_014618]"                                                             | opposite | 30958   | 3.71194    |
| 9   | ENSG0000090054.3  | "Serine palmitoyltransferase 1 (EC 2.3.1.50) (Long chain base biosynthesis protein 1) (LCB 1) (Serine-palmitoyl-CoA transferase 1) (SPT 1) (SPT1). [Source:SWISSPROT;Acc:O15269]" | opposite | 30794   | 24.0947    |
| 9   | ENSG0000096872.3  | "coiled-coil domain containing 2; capillary morphogenesis protein 1. [Source:RefSeq;Acc:NM_025103]"                                                                               | opposite | 31203   | 12.4117    |
| 9   | ENSG0000099810.4  | "5'-methylthioadenosine phosphorylase (EC 2.4.2.28) (MTA phosphorylase) (MTAPase). [Source:SWISSPROT;Acc:Q13126]"                                                                 | same     | 30421   | 6.20013    |
| 9   | ENSG00000107036.1 | "BA207C16.2 (Fragment). [Source:SPTREMBL;Acc:Q9NQL7]"                                                                                                                             | opposite | 31034   | 4.53068    |
| 9   | ENSG00000107263.5 | "Guanine nucleotide-releasing factor 2 (C3G protein) (CRK SH3-binding GNRP). [Source:SWISSPROT;Acc:Q13905]"                                                                       | opposite | 30979   | 20.8902    |
| 9   | ENSG00000119471.3 | (blank)                                                                                                                                                                           | opposite | 31598   | 13.8196    |
| 9   | ENSG00000119509.2 | "inversin isoform a; inversion of embryonic turning; nephronophthisis 2. [Source:RefSeq;Acc:NM_014425]"                                                                           | opposite | 31513   | 15.3555    |
| 9   | ENSG00000130957.1 | Fructose-1                                                                                                                                                                        | opposite | 30813   | 2.4033     |
| 9   | ENSG00000136842.3 | "Tropomodulin 1 (Erythrocyte tropomodulin) (E-Tmod). [Source:SWISSPROT;Acc:P28289]"                                                                                               | opposite | 31504   | 6.11799    |
| 9   | ENSG00000136928.2 | Gamma-aminobutyric acid type B receptor                                                                                                                                           | opposite | 30830   | 3.24338    |
| 9   |                   |                                                                                                                                                                                   |          | 30831   | 3.27712    |
| 9   | ENSG00000148120.1 | (blank)                                                                                                                                                                           | opposite | 31496   | 15.5735    |
| 9   |                   |                                                                                                                                                                                   |          | 31498   | 2.50336    |
| 9   | ENSG00000148308.2 | general transcription factor IIIC                                                                                                                                                 | opposite | 31651   | 21.4834    |
| 9   | ENSG00000148408.1 | Voltage-dependent N-type calcium channel alpha-1B subunit (Calcium channel)                                                                                                       | opposite | 31668   | 3.61866    |
| 9   |                   |                                                                                                                                                                                   |          | 31669   | 7.40323    |
| 9   | ENSG00000155158.4 | (blank)                                                                                                                                                                           | opposite | 30408   | 8.60934    |
| 9   | ENSG00000160563.3 | cofactor required for Sp1 transcriptional activation                                                                                                                              | opposite | 30981   | 3.36965    |
| 9   | ENSG00000164989.3 | (blank)                                                                                                                                                                           | opposite | 31107   | 3.85394    |
| 9   | ENSG00000165115.2 | "kinesin family member 27. [Source:RefSeq;Acc:NM_017576]"                                                                                                                         | opposite | 30748   | 4.58924    |
| 9   | ENSG00000171097.2 | "cytoplasmic cysteine conjugate-beta lyase; glutamine-phenylpyruvate aminotransferase. [Source:RefSeq;Acc:NM_004059]"                                                             | opposite | 30974   | 21.3478    |
| 9   | ENSG00000173077.3 | "deleted in esophageal cancer 1. [Source:RefSeq;Acc:NM_017418]"                                                                                                                   | same     | 30943   | 8.35489    |
| 9   |                   |                                                                                                                                                                                   | opposite | 31604   | 24.4728    |
| 9   | ENSG00000187210.1 | Beta-1                                                                                                                                                                            | opposite | 31418   | 14.8465    |
| 9   | ENSG00000188312.1 | (blank)                                                                                                                                                                           | opposite | 31480   | 3.9475     |
| 10  | ENSG0000023839.1  | "Canalicular multispecific organic anion transporter 1 (Multidrug resistance-associated protein 2) (Canalicular multidrug resistance protein). [Source:SWISSPROT;Acc:Q92887]"     | same     | 32298   | 0.960252   |



| Chr | Ensembl id        | Description                                                                                                                                                                                                                                      | Strand   | HERV id | HERV score |
|-----|-------------------|--------------------------------------------------------------------------------------------------------------------------------------------------------------------------------------------------------------------------------------------------|----------|---------|------------|
| 10  |                   |                                                                                                                                                                                                                                                  | opposite | 33127   | 24.6843    |
| 10  | ENSG00000065618.4 | "Collagen alpha 1(XVII) chain (Bullous pemphigoid antigen 2) (180 kDa bullous pemphigoid antigen 2). [Source:SWISSPROT;Acc:Q9UMD9]"                                                                                                              | opposite | 32309   | 8.23689    |
| 10  | ENSG00000066468.5 | "Fibroblast growth factor receptor 2 precursor (EC 2.7.1.112) (FGFR-2) (Keratinocyte growth factor receptor 2). [Source:SWISSPROT;Acc:P21802]"                                                                                                   | opposite | 32411   | 13.8358    |
| 10  | ENSG00000068383.4 | Type I inositol-1                                                                                                                                                                                                                                | opposite | 33248   | 8.24736    |
| 10  | ENSG00000107518.3 | (blank)                                                                                                                                                                                                                                          | opposite | 33187   | 2.00623    |
| 10  |                   |                                                                                                                                                                                                                                                  |          | 33188   | 4.83372    |
| 10  | ENSG00000107611.2 | "cubilin; intrinsic factor-cobalamin receptor; intrinsic factor B12-receptor. [Source:RefSeq;Acc:NM_001081]"                                                                                                                                     | same     | 32545   | 18.5305    |
| 10  | ENSG00000107779.1 | "Bone morphogenetic protein receptor type IA precursor (EC 2.7.1.37) (Serine/threonine-protein kinase receptor R5) (SKR5) (Activin receptor-like kinase 3) (ALK-3). [Source:SWISSPROT;Acc:P36894]"                                               | same     | 32234   | 6.29159    |
| 10  | ENSG00000107954.1 | "neuralized-like. [Source:RefSeq;Acc:NM_004210]"                                                                                                                                                                                                 | opposite | 33134   | 9.31079    |
| 10  | ENSG00000107987.5 | "Aldo-keto reductase family 1 member C4 (EC 1.1.1.-) (Chlordecone reductase) (EC 1.1.1.225) (CDR) (3-alpha-hydroxysteroid dehydrogenase) (EC 1.1.1.50) (3-alpha-HSD) (Dihydrodiol dehydrogenase 4) (DD4) (HAKRA). [Source:SWISSPROT;Acc:P17516]" | same     | 31699   | 2.41415    |
| 10  |                   |                                                                                                                                                                                                                                                  |          | 31701   | 9.70021    |
| 10  |                   |                                                                                                                                                                                                                                                  | opposite | 32471   | 3.90054    |
| 10  | ENSG00000108100.5 | "cyclin fold protein 1; cyclin-box carrying protein 1. [Source:RefSeq;Acc:NM_145012]"                                                                                                                                                            | opposite | 32641   | 13.446     |
| 10  | ENSG00000120292.5 | "Zinc finger protein 11B (Fragment). [Source:SWISSPROT;Acc:Q06732]"                                                                                                                                                                              | same     | 32676   | 11.873     |
| 10  |                   |                                                                                                                                                                                                                                                  |          | 32677   | 10.6994    |
| 10  |                   |                                                                                                                                                                                                                                                  | opposite | 31855   | 21.06      |
| 10  |                   |                                                                                                                                                                                                                                                  |          | 31856   | 19.9458    |
| 10  | ENSG00000120594.4 | "plexin domain containing 2 precursor; tumor endothelial marker 7-related; 1200007L24Rik. [Source:RefSeq;Acc:NM_032812]"                                                                                                                         | opposite | 32576   | 12.9278    |
| 10  | ENSG00000121898.2 | "Potential carboxypeptidase-like protein X2 precursor. [Source:SWISSPROT;Acc:Q8N436]"                                                                                                                                                            | opposite | 32421   | 6.10657    |
| 10  | ENSG00000126542.2 | (blank)                                                                                                                                                                                                                                          | same     | 32696   | 6.97704    |
| 10  | ENSG00000132334.4 | "Protein-tyrosine phosphatase epsilon precursor (EC 3.1.3.48) (R-PTP- epsilon). [Source:SWISSPROT;Acc:P23469]"                                                                                                                                   | same     | 32425   | 5.40739    |
| 10  |                   |                                                                                                                                                                                                                                                  |          | 32426   | 5.88365    |
| 10  | ENSG00000133661.2 | "Pulmonary surfactant-associated protein D precursor (SP-D) (PSP-D). [Source:SWISSPROT;Acc:P35247]"                                                                                                                                              | same     | 32990   | 13.815     |
| 10  |                   |                                                                                                                                                                                                                                                  | opposite | 32151   | 11.4166    |
| 10  | ENSG00000134461.2 | (blank)                                                                                                                                                                                                                                          | opposite | 31704   | 16.5621    |
| 10  | ENSG00000138185.3 | "Ectonucleoside triphosphate diphosphohydrolase 1 (EC 3.6.1.5) (NTPDase1) (Ecto-ATP diphosphohydrolase) (ATPDase) (Lymphoid cell activation antigen) (Ecto-apyrase) (CD39 antigen). [Source:SWISSPROT;Acc:P49961]"                               | opposite | 33121   | 17.2568    |
| 10  | ENSG00000148429.1 | (blank)                                                                                                                                                                                                                                          | opposite | 31730   | 4.27624    |
| 10  | ENSG00000148680.4 | "5-hydroxytryptamine 7 receptor (5-HT-7) (5-HT-X) (Serotonin receptor) (5HT7). [Source:SWISSPROT;Acc:P34969]"                                                                                                                                    | opposite | 32271   | 5.00751    |
| 10  |                   |                                                                                                                                                                                                                                                  |          | 32272   | 13.897     |
| 10  | ENSG00000150076.5 | "coiled-coil domain containing 7. [Source:RefSeq;Acc:NM_145023]"                                                                                                                                                                                 | same     | 31816   | 5.64572    |
| 10  |                   |                                                                                                                                                                                                                                                  |          | 31817   | 4.67611    |
| 10  |                   |                                                                                                                                                                                                                                                  |          | 31818   | 2.69895    |
| 10  |                   |                                                                                                                                                                                                                                                  | opposite | 32633   | 6.42689    |
| 10  | ENSG00000150275.3 | "Protocadherin 15 precursor. [Source:SWISSPROT;Acc:Q96QU1]"                                                                                                                                                                                      | same     | 32787   | 4.5554     |
| 10  |                   |                                                                                                                                                                                                                                                  | opposite | 31939   | 9.95612    |
| 10  |                   |                                                                                                                                                                                                                                                  |          | 31949   | 8.28006    |
| 10  | ENSG00000152487.1 | "nucleolar protein (NOL1/NOP2/sun) and PUA domains 1. [Source:RefSeq;Acc:NM_182543]"                                                                                                                                                             | opposite | 31754   | 7.14109    |
| 10  | ENSG00000165404.5 | "zinc finger protein 485; Zinc finger protein 93 (Zinc finger protein HTF34). [Source:RefSeq;Acc:NM_145312]"                                                                                                                                     | same     | 31859   | 44.2671    |
| 10  |                   |                                                                                                                                                                                                                                                  | opposite | 32682   | 5.58281    |

| Chr | Ensembl id        | Description                                                                                                                                                                                                                                 | Strand   | HERV id | HERV score |
|-----|-------------------|---------------------------------------------------------------------------------------------------------------------------------------------------------------------------------------------------------------------------------------------|----------|---------|------------|
| 10  |                   |                                                                                                                                                                                                                                             |          | 32683   | 20.6369    |
| 10  |                   |                                                                                                                                                                                                                                             |          | 32684   | 27.0561    |
| 10  | ENSG00000165449.2 | solute carrier family 16 (monocarboxylic acid transporters)                                                                                                                                                                                 | same     | 32887   | 9.66393    |
| 10  | ENSG00000165841.1 | "Cytochrome P450 2C19 (EC 1.14.13.80) ((R)-limonene 6-monooxygenase) (CYPIIC19) (P450-11A) (Mephenytoin 4-hydroxylase) (CYPIIC17) (P450-254C). [Source:SWISSPROT;Acc:P33261]"                                                               | opposite | 33107   | 20.8475    |
| 10  |                   |                                                                                                                                                                                                                                             |          | 33108   | 20.1338    |
| 10  | ENSG00000165886.1 | (blank)                                                                                                                                                                                                                                     | opposite | 33123   | 8.29952    |
| 10  |                   |                                                                                                                                                                                                                                             |          | 33124   | 5.76276    |
| 10  | ENSG00000165983.3 | "Phosphotriesterase related protein (Parathion hydrolase-related protein) (HPHRP). [Source:SWISSPROT;Acc:Q96BW5]"                                                                                                                           | opposite | 32543   | 6.15227    |
| 10  | ENSG00000169740.4 | "Zinc finger protein 239 (Zinc finger protein MOK-2) (HOK-2). [Source:SWISSPROT;Acc:Q16600]"                                                                                                                                                | same     | 32683   | 20.6369    |
| 10  |                   |                                                                                                                                                                                                                                             |          | 32684   | 27.0561    |
| 10  |                   |                                                                                                                                                                                                                                             | opposite | 31859   | 44.2671    |
| 10  | ENSG00000172987.2 | "heparanase 2; heparanase-like protein; heparanase 3. [Source:RefSeq;Acc:NM_021828]"                                                                                                                                                        | opposite | 32295   | 3.51126    |
| 10  | ENSG00000173876.2 | tubulin                                                                                                                                                                                                                                     | same     | 32441   | 4.63891    |
| 10  | ENSG00000175395.4 | "Zinc finger protein 25 (Zinc finger protein KOX19). [Source:SWISSPROT;Acc:P17030]"                                                                                                                                                         | opposite | 31831   | 24.2077    |
| 10  | ENSG00000179133.1 | (blank)                                                                                                                                                                                                                                     | opposite | 31781   | 4.74005    |
| 10  | ENSG00000182771.2 | "Glutamate receptor delta-1 subunit precursor (GluR delta-1). [Source:SWISSPROT;Acc:Q9ULK0]"                                                                                                                                                | opposite | 32231   | 2.81266    |
| 10  |                   |                                                                                                                                                                                                                                             |          | 32233   | 4.46631    |
| 10  | ENSG00000183230.1 | catenin (cadherin-associated protein)                                                                                                                                                                                                       | opposite | 32109   | 8.99706    |
| 10  |                   |                                                                                                                                                                                                                                             |          | 32114   | 13.1523    |
| 10  | ENSG00000183675.3 | (blank)                                                                                                                                                                                                                                     | same     | 32708   | 6.95004    |
| 10  | ENSG00000185532.2 | cGMP-dependent protein kinase 1                                                                                                                                                                                                             | opposite | 32737   | 4.21107    |
| 10  |                   |                                                                                                                                                                                                                                             |          | 32739   | 22.2062    |
| 10  | ENSG00000185736.3 | "Double-stranded RNA-specific editase B2 (EC 3.5.-.-) (dsRNA adenosine deaminase B2) (RNA dependent adenosine deaminase 3) (RNA editing deaminase 2) (RNA editing enzyme 2). [Source:SWISSPROT;Acc:Q9NS39]"                                 | opposite | 31672   | 10.192     |
| 10  | ENSG00000185904.2 | (blank)                                                                                                                                                                                                                                     | same     | 31855   | 21.06      |
| 10  | ENSG00000189180.1 | "Zinc finger protein 33A (Zinc finger protein KOX31) (HA0946). [Source:SWISSPROT;Acc:Q06730]"                                                                                                                                               | same     | 31831   | 24.2077    |
| 11  | ENSG00000048028.4 | "Ubiquitin carboxyl-terminal hydrolase 28 (EC 3.1.2.15) (Ubiquitin thiolesterase 28) (Ubiquitin-specific processing protease 28) (Deubiquitinating enzyme 28). [Source:SWISSPROT;Acc:Q96RU2]"                                               | opposite | 34163   | 1.53988    |
| 11  | ENSG00000086991.2 | "NADPH oxidase 4. [Source:RefSeq;Acc:NM_016931]"                                                                                                                                                                                            | opposite | 33925   | 18.5733    |
| 11  | ENSG00000087884.4 | "PTD015 protein. [Source:RefSeq;Acc:NM_024684]"                                                                                                                                                                                             | opposite | 34772   | 28.4604    |
| 11  | ENSG00000109911.4 | "elongation protein 4 homolog; PAX6 neighbor gene; chromosome 11 open reading frame 19. [Source:RefSeq;Acc:NM_019040]"                                                                                                                      | opposite | 34495   | 13.878     |
| 11  | ENSG00000129084.4 | "Proteasome subunit alpha type 1 (EC 3.4.25.1) (Proteasome component C2) (Macropain subunit C2) (Multicatalytic endopeptidase complex subunit C2) (Proteasome nu chain) (30 kDa prosomal protein) (PROS-30). [Source:SWISSPROT;Acc:P25786]" | opposite | 33341   | 23.5037    |
| 11  |                   |                                                                                                                                                                                                                                             |          | 33342   | 4.83138    |
| 11  | ENSG00000129744.1 | "GPI-linked NAD(P)(+)-arginine ADP-ribosyltransferase 1 precursor (EC 2.4.2.31) (Mono(ADP-ribosyl)transferase). [Source:SWISSPROT;Acc:P52961]"                                                                                              | same     | 33281   | 15.0425    |
| 11  | ENSG00000133812.4 | "SET binding factor 2. [Source:RefSeq;Acc:NM_030962]"                                                                                                                                                                                       | opposite | 33332   | 4.49481    |
| 11  | ENSG00000134343.3 | "Transmembrane protein 16C. [Source:SWISSPROT;Acc:Q9BYT9]"                                                                                                                                                                                  | opposite | 34458   | 12.5019    |
| 11  | ENSG00000137494.2 | (blank)                                                                                                                                                                                                                                     | opposite | 34801   | 6.30454    |
| 11  | ENSG00000137634.1 | (blank)                                                                                                                                                                                                                                     | opposite | 34169   | 22.0964    |
| 11  | ENSG00000137737.1 | "layilin. [Source:RefSeq;Acc:NM_178834]"                                                                                                                                                                                                    | opposite | 35068   | 4.27377    |
| 11  | ENSG00000149084.2 | "steroid dehydrogenase homolog; 3-ketoacyl-CoA reductase. [Source:RefSeq;Acc:NM_016142]"                                                                                                                                                    | opposite | 34603   | 7.5444     |
| 11  | ENSG00000149089.1 | (blank)                                                                                                                                                                                                                                     | opposite | 33484   | 22.0911    |

| Chr | Ensembl id        | Description                                                                                                                                      | Strand   | HERV id | HERV score |
|-----|-------------------|--------------------------------------------------------------------------------------------------------------------------------------------------|----------|---------|------------|
| 11  | ENSG00000149295.4 | "D(2) dopamine receptor. [Source:SWISSPROT;Acc:P14416]"                                                                                          | opposite | 34161   | 5.4661     |
| 11  | ENSG00000149308.3 | nuclear protein                                                                                                                                  | opposite | 34143   | 26.7794    |
| 11  | ENSG00000149452.5 | "solute carrier family 22 member 8; organic anion transporter 3. [Source:RefSeq;Acc:NM_004254]"                                                  | opposite | 33760   | 11.1324    |
| 11  |                   |                                                                                                                                                  |          | 33761   | 15.4318    |
| 11  | ENSG00000149548.3 | (blank)                                                                                                                                          | opposite | 35118   | 6.44698    |
| 11  | ENSG00000150672.3 | Channel associated protein of synapse-110 (Chapsyn-110) (Discs                                                                                   | same     | 34806   | 4.17056    |
| 11  | ENSG00000151376.4 | NADP-dependent malic enzyme                                                                                                                      | opposite | 33898   | 3.94205    |
| 11  | ENSG00000152404.3 | CWF19-like 2                                                                                                                                     | opposite | 34140   | 3.55711    |
| 11  | ENSG00000152578.1 | Glutamate receptor 4 precursor (GluR-4) (GluR4) (GluR-D) (Glutamate receptor ionotropic                                                          | opposite | 35036   | 4.06382    |
| 11  | ENSG00000162105.2 | "SH3 and multiple ankyrin repeat domains protein 2 (Shank2). [Source:SWISSPROT;Acc:Q9UPX8]"                                                      | opposite | 33789   | 5.53692    |
| 11  | ENSG00000162174.2 | "asparaginase-like 1 protein. [Source:RefSeq;Acc:NM_025080]"                                                                                     | opposite | 34719   | 12.8036    |
| 11  |                   |                                                                                                                                                  |          | 34720   | 21.7598    |
| 11  | ENSG00000165325.3 | (blank)                                                                                                                                          | opposite | 34865   | 3.58518    |
| 11  | ENSG00000165973.5 | "Protein kinase C-binding protein NELL1 precursor (NEL-like protein 1) (Nel-related protein 1). [Source:SWISSPROT;Acc:Q92832]"                   | same     | 33366   | 2.42808    |
| 11  | ENSG00000166323.2 | (blank)                                                                                                                                          | same     | 35056   | 3.89208    |
| 11  |                   |                                                                                                                                                  | opposite | 34146   | 5.00816    |
| 11  | ENSG00000166435.4 | "X-ray radiation resistance associated 1. [Source:SPTREMBL;Acc:Q7Z463]"                                                                          | opposite | 33806   | 16.124     |
| 11  |                   |                                                                                                                                                  |          | 33807   | 5.62899    |
| 11  | ENSG00000166693.2 | "Olfactory receptor 5M1 (OST050). [Source:SWISSPROT;Acc:Q8NGP8]"                                                                                 | opposite | 33677   | 3.10311    |
| 11  | ENSG00000166961.3 | (blank)                                                                                                                                          | same     | 33733   | 5.17923    |
| 11  |                   |                                                                                                                                                  |          | 33734   | 8.4182     |
| 11  |                   |                                                                                                                                                  |          | 33735   | 8.82897    |
| 11  | ENSG00000168959.3 | "Metabotropic glutamate receptor 5 precursor (mGluR5). [Source:SWISSPROT;Acc:P41594]"                                                            | opposite | 33911   | 2.628      |
| 11  |                   |                                                                                                                                                  |          | 33918   | 7.01314    |
| 11  | ENSG00000169519.4 | (blank)                                                                                                                                          | same     | 33453   | 8.69522    |
| 11  | ENSG00000170959.2 | (blank)                                                                                                                                          | same     | 34493   | 4.11598    |
| 11  | ENSG00000171994.3 | "Olfactory receptor 52K1. [Source:SWISSPROT;Acc:Q8NGK4]"                                                                                         | same     | 33287   | 3.20159    |
| 11  |                   |                                                                                                                                                  | opposite | 34282   | 16.9919    |
| 11  |                   |                                                                                                                                                  |          | 34283   | 6.12067    |
| 11  | ENSG00000172324.2 | "Olfactory receptor 5A2. [Source:SWISSPROT;Acc:Q8NGI9]"                                                                                          | same     | 34696   | 20.0399    |
| 11  |                   |                                                                                                                                                  |          | 34697   | 6.39808    |
| 11  |                   |                                                                                                                                                  |          | 34698   | 14.2965    |
| 11  |                   |                                                                                                                                                  | opposite | 33699   | 15.0199    |
| 11  |                   |                                                                                                                                                  |          | 33708   | 17.6505    |
| 11  |                   |                                                                                                                                                  |          | 33712   | 6.75616    |
| 11  | ENSG00000181995.2 | (blank)                                                                                                                                          | same     | 33732   | 4.14929    |
| 11  | ENSG00000182634.3 | "Olfactory receptor 10G7. [Source:SWISSPROT;Acc:Q8NGN6]"                                                                                         | same     | 35113   | 7.95989    |
| 11  | ENSG00000182667.2 | "Neurotrimin precursor (hNT). [Source:SWISSPROT;Acc:Q9P121]"                                                                                     | opposite | 35155   | 7.98844    |
| 11  | ENSG00000183715.1 | "Opioid binding protein/cell adhesion molecule precursor (OBCAM) (Opioid-binding cell adhesion molecule) (OPCML). [Source:SWISSPROT;Acc:Q14982]" | opposite | 34244   | 3.22968    |
| 11  |                   |                                                                                                                                                  |          | 34245   | 5.20504    |
| 11  | ENSG00000185688.2 | "Olfactory receptor 8B8 (Olfactory receptor TPCR85) (Olfactory-like receptor JCG8). [Source:SWISSPROT;Acc:Q15620]"                               | same     | 35111   | 13.1667    |
| 11  |                   |                                                                                                                                                  |          | 35113   | 7.95989    |
| 11  | ENSG00000187398.1 | (blank)                                                                                                                                          | opposite | 34420   | 22.4848    |

| Chr | Ensembl id        | Description                                                                                                                                                                                                     | Strand   | HERV id | HERV score |
|-----|-------------------|-----------------------------------------------------------------------------------------------------------------------------------------------------------------------------------------------------------------|----------|---------|------------|
| 11  | ENSG00000188211.1 | (blank)                                                                                                                                                                                                         | same     | 33351   | 22.8378    |
| 12  | ENSG00000004700.5 | "ATP-dependent DNA helicase Q1 (DNA-dependent ATPase Q1). [Source:SWISSPROT;Acc:P46063]"                                                                                                                        | opposite | 35339   | 4.03071    |
| 12  | ENSG00000006831.3 | "Adiponectin receptor protein 2. [Source:SWISSPROT;Acc:Q86V24]"                                                                                                                                                 | opposite | 36141   | 29.7795    |
| 12  | ENSG00000018236.4 | "Contactin precursor (Glycoprotein gP135). [Source:SWISSPROT;Acc:Q12860]"                                                                                                                                       | opposite | 36505   | 8.29168    |
| 12  | ENSG00000047617.3 | "Transmembrane protein 16B. [Source:SWISSPROT;Acc:Q9NQ90]"                                                                                                                                                      | opposite | 35173   | 7.30776    |
| 12  |                   |                                                                                                                                                                                                                 |          | 35174   | 4.45163    |
| 12  | ENSG00000074527.2 | "netrin 4; beta-netrin. [Source:RefSeq;Acc:NM_021229]"                                                                                                                                                          | opposite | 36042   | 11.7568    |
| 12  | ENSG00000079081.5 | "Similar to SLIT-ROBO Rho GTPase-activating protein 1. [Source:SPTREMBL;Acc:Q8N6J5]"                                                                                                                            | opposite | 36708   | 5.70945    |
| 12  | ENSG00000083782.1 | "Dermatan sulfate proteoglycan 3 precursor (Epiphycan) (Small chondroitin/dermatan sulfate proteoglycan) (Proteoglycan-Lb) (PG-Lb). [Source:SWISSPROT;Acc:Q99645]"                                              | opposite | 36017   | 8.80748    |
| 12  | ENSG00000086117.3 | "Sodium channel protein type VIII alpha subunit. [Source:SWISSPROT;Acc:Q9UQD0]"                                                                                                                                 | opposite | 36570   | 20.1438    |
| 12  |                   |                                                                                                                                                                                                                 |          | 36571   | 7.35361    |
| 12  | ENSG00000089818.4 | (blank)                                                                                                                                                                                                         | same     | 35207   | 4.20236    |
| 12  |                   |                                                                                                                                                                                                                 |          | 35208   | 3.75301    |
| 12  | ENSG00000090612.5 | "Zinc finger protein 26 (Zinc finger protein KOX20) (Fragment). [Source:SWISSPROT;Acc:P17031]"                                                                                                                  | same     | 36135   | 14.6867    |
| 12  |                   |                                                                                                                                                                                                                 | opposite | 37203   | 16.2758    |
| 12  | ENSG00000091039.4 | "Oxysterol binding protein-related protein 8 (OSBP-related protein 8) (ORP-8). [Source:SWISSPROT;Acc:Q9BZF1]"                                                                                                   | opposite | 35792   | 4.6691     |
| 12  | ENSG00000111110.2 | (blank)                                                                                                                                                                                                         | opposite | 35644   | 4.86496    |
| 12  | ENSG00000111218.1 | "Protein arginine N-methyltransferase 4 (EC 2.1.1.-). [Source:SWISSPROT;Acc:Q9NR22]"                                                                                                                            | same     | 35165   | 5.91549    |
| 12  |                   |                                                                                                                                                                                                                 |          | 35166   | 6.23242    |
| 12  | ENSG00000111249.2 | "Homeobox protein Cux-2 (Cut-like 2) (Fragment). [Source:SWISSPROT;Acc:O14529]"                                                                                                                                 | opposite | 37161   | 5.14743    |
| 12  |                   |                                                                                                                                                                                                                 |          | 37162   | 3.9793     |
| 12  | ENSG00000111700.2 | "Solute carrier family 21 member 8 (Organic anion transporter 8) (Organic anion transporting polypeptide 8) (OATP8) (Liver-specific organic anion transporter 2) (LST-2). [Source:SWISSPROT;Acc:Q9NPD5]"        | opposite | 36295   | 13.2133    |
| 12  |                   |                                                                                                                                                                                                                 |          | 36296   | 9.31559    |
| 12  | ENSG00000111713.1 | Glycogen [starch] synthase                                                                                                                                                                                      | opposite | 35340   | 7.14234    |
| 12  | ENSG00000118307.3 | "cancer susceptibility candidate 1; lung adenoma susceptibility 1-like. [Source:RefSeq;Acc:NM_018272]"                                                                                                          | opposite | 35373   | 10.093     |
| 12  | ENSG00000120853.3 | (blank)                                                                                                                                                                                                         | same     | 37119   | 11.3441    |
| 12  | ENSG00000122970.4 | "carnitine deficiency-associated gene expressed in ventricle 1. [Source:RefSeq;Acc:NM_014055]"                                                                                                                  | opposite | 37160   | 3.60857    |
| 12  | ENSG00000123104.2 | Inositol 1                                                                                                                                                                                                      | opposite | 35387   | 6.37246    |
| 12  | ENSG00000127325.4 | "Bestrophin 4 (Vitelliform macular dystrophy 2-like protein 3). [Source:SWISSPROT;Acc:Q8N1M1]"                                                                                                                  | same     | 36740   | 5.3078     |
| 12  | ENSG00000127337.1 | "glioma-amplified sequence-41; NuMA binding protein 1. [Source:RefSeq;Acc:NM_006530]"                                                                                                                           | opposite | 36739   | 7.18612    |
| 12  | ENSG00000127720.1 | (blank)                                                                                                                                                                                                         | opposite | 36927   | 8.02398    |
| 12  | ENSG00000129317.3 | (blank)                                                                                                                                                                                                         | opposite | 35495   | 6.28212    |
| 12  | ENSG00000134283.4 | "periphilin 1 isoform 5; gastric cancer antigen Ga50. [Source:RefSeq;Acc:NM_201438]"                                                                                                                            | same     | 35487   | 16.7198    |
| 12  | ENSG00000135426.2 | (blank)                                                                                                                                                                                                         | same     | 36581   | 13.1776    |
| 12  | ENSG00000136052.1 | solute carrier family 41                                                                                                                                                                                        | opposite | 36074   | 4.9095     |
| 12  | ENSG00000139144.1 | "Phosphatidylinositol-4-phosphate 3-kinase C2 domain-containing gamma polypeptide (EC 2.7.1.154) (Phosphoinositide 3-Kinase-C2-gamma) (PtdIns-3-kinase C2 gamma) (PI3K-C2gamma). [Source:SWISSPROT;Acc:O75747]" | opposite | 36276   | 5.24137    |
| 12  |                   |                                                                                                                                                                                                                 |          | 36278   | 4.93603    |
| 12  | ENSG00000139146.3 | (blank)                                                                                                                                                                                                         | same     | 36441   | 1.66891    |
| 12  | ENSG00000139173.1 | (blank)                                                                                                                                                                                                         | same     | 35502   | 2.27749    |
| 12  |                   |                                                                                                                                                                                                                 | opposite | 36528   | 20.9795    |
| 12  | ENSG00000139292.2 | "Leucine-rich repeat-containing G protein-coupled receptor 5 precursor (Orphan G protein-coupled receptor HG38) (G protein-coupled                                                                              | opposite | 36760   | 6.96297    |

| Chr | Ensembl id        | Description                                                                                                                                                                                                                        | Strand   | HERV id | HERV score |
|-----|-------------------|------------------------------------------------------------------------------------------------------------------------------------------------------------------------------------------------------------------------------------|----------|---------|------------|
|     |                   | receptor 49). [Source:SWISSPROT;Acc:O75473]"                                                                                                                                                                                       |          |         |            |
| 12  | ENSG00000139324.3 | (blank)                                                                                                                                                                                                                            | opposite | 37038   | 18.3492    |
| 12  | ENSG00000139430.1 | "T-cell activation protein phosphatase 2C. [Source:RefSeq;Acc:NM_139283]"                                                                                                                                                          | opposite | 36093   | 11.6202    |
| 12  | ENSG00000150045.2 | killer cell lectin-like receptor subfamily F                                                                                                                                                                                       | opposite | 36180   | 4.04298    |
| 12  | ENSG00000151490.4 | "Receptor-type protein-tyrosine phosphatase O precursor (EC 3.1.3.48) (Glomerular epithelial protein 1) (Protein tyrosine phosphatase U2) (PTPase U2) (PTP-U2). [Source:SWISSPROT;Acc:Q16827]"                                     | opposite | 36241   | 2.71625    |
| 12  | ENSG00000151746.2 | "Cytoskeleton-like bicaudal D protein homolog 1. [Source:SWISSPROT;Acc:Q96G01]"                                                                                                                                                    | same     | 35428   | 3.50359    |
| 12  | ENSG00000151952.4 | (blank)                                                                                                                                                                                                                            | opposite | 36126   | 7.18707    |
| 12  | ENSG00000152936.3 | (blank)                                                                                                                                                                                                                            | same     | 36374   | 2.44921    |
| 12  | ENSG00000166532.3 | (blank)                                                                                                                                                                                                                            | opposite | 36166   | 18.3652    |
| 12  | ENSG00000171435.3 | "kinase suppressor of Ras-2. [Source:RefSeq;Acc:NM_173598]"                                                                                                                                                                        | opposite | 36103   | 5.23819    |
| 12  | ENSG00000171681.4 | "activating transcription factor 7 interacting protein; MBD1-containing chromatin associated factor. [Source:RefSeq;Acc:NM_018179]"                                                                                                | opposite | 36218   | 6.03402    |
| 12  | ENSG00000173588.3 | "NY-REN-58 antigen. [Source:RefSeq;Acc:NM_016122]"                                                                                                                                                                                 | opposite | 36028   | 17.1588    |
| 12  |                   |                                                                                                                                                                                                                                    |          | 36029   | 1.22267    |
| 12  | ENSG00000177478.4 | "Seven transmembrane helix receptor. [Source:SPTREMBL;Acc:Q8NH09]"                                                                                                                                                                 | same     | 35534   | 5.03474    |
| 12  |                   |                                                                                                                                                                                                                                    | opposite | 36562   | 2.72561    |
| 12  | ENSG00000179520.1 | solute carrier family 17 (sodium-dependent inorganic phosphate cotransporter)                                                                                                                                                      | opposite | 37120   | 2.56273    |
| 12  | ENSG00000183880.4 | "zinc finger protein 605. [Source:RefSeq;Acc:NM_183238]"                                                                                                                                                                           | same     | 37203   | 16.2758    |
| 12  | ENSG00000185046.3 | "E2a-Pbx1-associated protein; amyloid-beta precursor protein intracellular domain associated protein 1; cajalin 2. [Source:RefSeq;Acc:NM_020140]"                                                                                  | opposite | 36054   | 17.171     |
| 12  | ENSG00000185306.1 | (blank)                                                                                                                                                                                                                            | same     | 36709   | 6.66845    |
| 12  |                   |                                                                                                                                                                                                                                    | opposite | 35650   | 3.6119     |
| 12  | ENSG00000186908.3 | "huntingtin interacting protein 14; Huntingtin interacting protein H; huntingtin interacting protein 3; zinc finger"                                                                                                               | same     | 35796   | 5.66966    |
| 13  | ENSG00000032742.4 | "Recessive polycystic kidney disease protein Tg737 homolog. [Source:SWISSPROT;Acc:Q13099]"                                                                                                                                         | opposite | 38270   | 19.4898    |
| 13  | ENSG00000080618.2 | "plasma carboxypeptidase B2 isoform a preproprotein; carboxypeptidase U; thrombin-activatable fibrinolysis inhibitor; carboxypeptidase B-like protein; thrombin-activatable fibrinolysis inhibitor. [Source:RefSeq;Acc:NM_001872]" | opposite | 37339   | 4.82875    |
| 13  | ENSG00000083544.1 | "Tudor domain containing protein 3. [Source:SWISSPROT;Acc:Q9H7E2]"                                                                                                                                                                 | same     | 37497   | 3.09948    |
| 13  |                   |                                                                                                                                                                                                                                    |          | 37498   | 6.9597     |
| 13  | ENSG00000102452.3 | "voltage gated channel like 1; four repeat voltage-gated ion channel. [Source:RefSeq;Acc:NM_052867]"                                                                                                                               | opposite | 38210   | 19.7982    |
| 13  | ENSG00000102531.3 | (blank)                                                                                                                                                                                                                            | opposite | 38418   | 5.60879    |
| 13  | ENSG00000102606.4 | "Rho guanine nucleotide exchange factor 7 (PAK-interacting exchange factor beta) (Beta-Pix) (COOL-1) (p85). [Source:SWISSPROT;Acc:Q14155]"                                                                                         | opposite | 39379   | 22.3105    |
| 13  | ENSG00000102683.1 | "Gamma-sarcoglycan (Gamma-SG) (35 kDa dystrophin-associated glycoprotein) (35DAG). [Source:SWISSPROT;Acc:Q13326]"                                                                                                                  | same     | 37239   | 5.86743    |
| 13  | ENSG00000120662.3 | Peptide chain release factor 1                                                                                                                                                                                                     | same     | 38393   | 6.74149    |
| 13  | ENSG00000120675.1 | "DNAJ domain-containing; methylation-controlled J protein. [Source:RefSeq;Acc:NM_013238]"                                                                                                                                          | opposite | 38398   | 7.18447    |
| 13  | ENSG00000120697.1 | "Dolichyl-phosphate beta-glucosyltransferase (EC 2.4.1.117) (DolP- glucosyltransferase) (HSPC149). [Source:SWISSPROT;Acc:Q9Y673]"                                                                                                  | opposite | 37299   | 13.7368    |
| 13  | ENSG00000127870.3 | "RING finger protein 6. [Source:SWISSPROT;Acc:Q9Y252]"                                                                                                                                                                             | same     | 38288   | 4.38962    |
| 13  | ENSG00000132938.5 | (blank)                                                                                                                                                                                                                            | opposite | 38300   | 4.48987    |
| 13  | ENSG00000133104.2 | "spartin; trans-activated by hepatitis C virus core protein 1. [Source:RefSeq;Acc:NM_015087]"                                                                                                                                      | opposite | 37296   | 14.7876    |
| 13  | ENSG00000134900.2 | "Tripeptidyl-peptidase II (EC 3.4.14.10) (TPP-II) (Tripeptidyl aminopeptidase). [Source:SWISSPROT;Acc:P29144]"                                                                                                                     | opposite | 39319   | 15.9283    |
| 13  | ENSG00000136160.5 | "Endothelin B receptor precursor (ET-B) (Endothelin receptor Non-selective type). [Source:SWISSPROT;Acc:P24530]"                                                                                                                   | same     | 38904   | 16.1373    |
| 13  |                   |                                                                                                                                                                                                                                    |          | 38905   | 6.80734    |
| 13  |                   |                                                                                                                                                                                                                                    |          | 38906   | 9.97052    |

| Chr | Ensembl id        | Description                                                                                                                                                                                                        | Strand   | HERV id | HERV score |
|-----|-------------------|--------------------------------------------------------------------------------------------------------------------------------------------------------------------------------------------------------------------|----------|---------|------------|
| 13  | ENSG00000165487.3 | "Smhs2 homolog. [Source:RefSeq;Acc:NM_152726]"                                                                                                                                                                     | opposite | 37221   | 6.71522    |
| 13  | ENSG00000172915.4 | "Neurobeachin protein (Lysosomal trafficking regulator 2) (BCL8B protein). [Source:SWISSPROT;Acc:Q8NFP9]"                                                                                                          | opposite | 38329   | 12.4334    |
| 13  | ENSG00000175198.2 | Propionyl-CoA carboxylase alpha chain                                                                                                                                                                              | same     | 38209   | 31.1435    |
| 13  |                   |                                                                                                                                                                                                                    | opposite | 39306   | 7.48408    |
| 13  | ENSG00000177527.1 | (blank)                                                                                                                                                                                                            | opposite | 37623   | 12.305     |
| 13  |                   |                                                                                                                                                                                                                    |          | 37624   | 18.4932    |
| 13  | ENSG00000184226.3 | "Protocadherin 9 precursor. [Source:SWISSPROT;Acc:Q9HC56]"                                                                                                                                                         | opposite | 37687   | 5.56504    |
| 13  | ENSG00000184497.1 | (blank)                                                                                                                                                                                                            | opposite | 38264   | 10.7606    |
| 13  | ENSG00000187676.1 | "beta 3-glycosyltransferase-like. [Source:RefSeq;Acc:NM_194318]"                                                                                                                                                   | opposite | 38302   | 1.17687    |
| 14  | ENSG00000071537.2 | "Sel-1 homolog precursor (Suppressor of lin-12-like protein) (Sel-1L). [Source:SWISSPROT;Acc:Q9UBV2]"                                                                                                              | opposite | 39950   | 3.9862     |
| 14  | ENSG00000080823.5 | "MAPK/MAK/MRK overlapping kinase (EC 2.7.1.37) (MOK protein kinase) (Renal tumor antigen 1) (RAGE-1). [Source:SWISSPROT;Acc:Q9UQ07]"                                                                               | opposite | 40108   | 19.1132    |
| 14  | ENSG00000100436.1 | (blank)                                                                                                                                                                                                            | opposite | 40403   | 22.4721    |
| 14  | ENSG00000100523.3 | "Probable phospholipase DDHD1 (EC 3.1.1.-) (DDHD domain protein 1) (Phosphatidic acid-preferring phospholipase A1 homolog) (PA-PLA1). [Source:SWISSPROT;Acc:Q8NEL9]"                                               | opposite | 39846   | 15.7662    |
| 14  | ENSG00000100592.3 | "Disheveled associated activator of morphogenesis 1. [Source:SWISSPROT;Acc:Q9Y4D1]"                                                                                                                                | opposite | 40504   | 6.88689    |
| 14  | ENSG00000100599.4 | "Ras and Rab interactor 3 (Ras interaction/interference protein 3). [Source:SWISSPROT;Acc:Q8TB24]"                                                                                                                 | opposite | 40701   | 4.43707    |
| 14  | ENSG00000100784.2 | "Ribosomal protein S6 kinase alpha 5 (EC 2.7.1.37) (Nuclear mitogen-and stress-activated protein kinase-1) (90 kDa ribosomal protein S6 kinase 5) (RSK-like protein kinase) (RLSK). [Source:SWISSPROT;Acc:O75582]" | opposite | 40057   | 6.09945    |
| 14  |                   |                                                                                                                                                                                                                    |          | 40058   | 3.33999    |
| 14  | ENSG00000119686.1 | (blank)                                                                                                                                                                                                            | opposite | 40603   | 18.8401    |
| 14  | ENSG00000130076.5 | "Ig alpha-1 chain C region. [Source:SWISSPROT;Acc:P01876]"                                                                                                                                                         | same     | 40750   | 3.24711    |
| 14  |                   |                                                                                                                                                                                                                    |          | 40760   | 23.4871    |
| 14  |                   |                                                                                                                                                                                                                    | opposite | 40124   | 2.59541    |
| 14  | ENSG00000131969.4 | (blank)                                                                                                                                                                                                            | same     | 39829   | 6.74262    |
| 14  | ENSG00000133958.2 | "KIAA1409. [Source:RefSeq;Acc:NM_020818]"                                                                                                                                                                          | same     | 40071   | 4.29013    |
| 14  |                   |                                                                                                                                                                                                                    | opposite | 40710   | 17.3893    |
| 14  | ENSG00000133983.1 | (blank)                                                                                                                                                                                                            | opposite | 39920   | 24.5508    |
| 14  | ENSG00000139915.4 | "MAM domain containing 1. [Source:RefSeq;Acc:NM_182830]"                                                                                                                                                           | opposite | 39776   | 11.9284    |
| 14  | ENSG00000139971.3 | "Human full-length cDNA clone CS0DC025YL05 of neuroblastoma of Homo sapiens (Human). [Source:SPTREMBL;Acc:Q86TY3]"                                                                                                 | opposite | 39860   | 59.5417    |
| 14  | ENSG00000139985.3 | "ADAM 21 precursor (EC 3.4.24.-) (A disintegrin and metalloproteinase domain 21). [Source:SWISSPROT;Acc:Q9UKJ8]"                                                                                                   | same     | 39920   | 24.5508    |
| 14  |                   |                                                                                                                                                                                                                    | opposite | 40585   | 18.5662    |
| 14  |                   |                                                                                                                                                                                                                    |          | 40587   | 4.90705    |
| 14  |                   |                                                                                                                                                                                                                    |          | 40588   | 22.0239    |
| 14  | ENSG00000140015.5 | "Potassium voltage-gated channel subfamily H member 5 (Ether-a-go-go potassium channel 2) (hEAG2). [Source:SWISSPROT;Acc:Q8NCM2]"                                                                                  | same     | 40530   | 14.4866    |
| 14  |                   |                                                                                                                                                                                                                    |          | 40532   | 8.10694    |
| 14  | ENSG00000151338.5 | "mirror-image polydactyly 1; mirror-image polydactyly gene 1. [Source:RefSeq;Acc:NM_138731]"                                                                                                                       | opposite | 40248   | 2.43163    |
| 14  | ENSG00000151413.5 | (blank)                                                                                                                                                                                                            | opposite | 40230   | 15.4496    |
| 14  | ENSG00000171723.5 | "Gephyrin. [Source:SWISSPROT;Acc:Q9NQX3]"                                                                                                                                                                          | opposite | 40551   | 6.82775    |
| 14  | ENSG00000182732.3 | "Regulator of G-protein signaling 6 (RGS6) (S914). [Source:SWISSPROT;Acc:P49758]"                                                                                                                                  | opposite | 40598   | 6.35107    |
| 14  | ENSG00000185024.2 | Transcription factor IIIB 90 kDa subunit (TFIIIB90) (hTFIIIB90) (B-related factor 1) (hBRF) (TATA box-binding protein-associated factor                                                                            | same     | 40741   | 1.34183    |
| 14  | ENSG00000188899.1 | "Ig heavy chain V-III region DOB. [Source:SWISSPROT;Acc:P01782]"                                                                                                                                                   | same     | 40750   | 3.24711    |
| 14  |                   |                                                                                                                                                                                                                    | opposite | 40124   | 2.59541    |

| Chr | Ensembl id        | Description                                                                                                                                                                                          | Strand   | HERV id | HERV score |
|-----|-------------------|------------------------------------------------------------------------------------------------------------------------------------------------------------------------------------------------------|----------|---------|------------|
| 14  | ENSG00000189012.1 | "Striatin 3 (Cell-cycle autoantigen SG2NA) (S/G2 antigen). [Source:SWISSPROT;Acc:Q13033]"                                                                                                            | opposite | 39527   | 5.16029    |
| 15  | ENSG00000092529.5 | "Calpain 3 (EC 3.4.22.-) (Calpain L3) (Calpain p94) (Calcium-activated neutral proteinase 3) (CANP 3) (Muscle-specific calcium-activated neutral protease 3) (nCL-1). [Source:SWISSPROT;Acc:P20807]" | same     | 40903   | 1.59583    |
| 15  | ENSG00000103733.1 | "Adapter-related protein complex 3 beta 2 subunit (Beta-adaptin 3B) (AP-3 complex beta-3B subunit) (Beta-3B-adaptin) (Neuron-specific vesicle coat protein beta-NAP). [Source:SWISSPROT;Acc:Q13367]" | opposite | 41040   | 12.6341    |
| 15  | ENSG00000104044.4 | "P protein (Melanocyte-specific transporter protein). [Source:SWISSPROT;Acc:Q04671]"                                                                                                                 | opposite | 40847   | 5.19246    |
| 15  | ENSG00000128739.5 | "Small nuclear ribonucleoprotein associated protein N (snRNP-N) (Sm protein N) (Sm-N) (SmN) (Sm-D) (Tissue-specific splicing protein). [Source:SWISSPROT;Acc:P14648]"                                | opposite | 41245   | 1.22278    |
| 15  |                   |                                                                                                                                                                                                      |          | 41247   | 4.04451    |
| 15  | ENSG00000128881.5 | "tau tubulin kinase 2; tau-tubulin kinase. [Source:RefSeq;Acc:NM_173500]"                                                                                                                            | opposite | 40904   | 17.2859    |
| 15  | ENSG00000134146.1 | (blank)                                                                                                                                                                                              | opposite | 40880   | 7.65686    |
| 15  | ENSG00000134152.2 | (blank)                                                                                                                                                                                              | same     | 41283   | 12.6616    |
| 15  | ENSG00000137819.2 | "membrane progesterin receptor gamma; progesterin and adipoQ receptor family member V. [Source:RefSeq;Acc:NM_017705]"                                                                                | same     | 40994   | 6.04033    |
| 15  | ENSG00000137869.2 | "Cytochrome P450 19A1 (Aromatase) (EC 1.14.14.1) (CYP19) (Estrogen synthetase) (P-450AROM). [Source:SWISSPROT;Acc:P11511]"                                                                           | opposite | 40946   | 14.486     |
| 15  | ENSG00000140374.4 | Electron transfer flavoprotein alpha-subunit                                                                                                                                                         | opposite | 41015   | 20.9454    |
| 15  | ENSG00000140386.3 | "Zinc finger protein 291. [Source:SWISSPROT;Acc:Q9BY12]"                                                                                                                                             | opposite | 41018   | 6.31601    |
| 15  | ENSG00000140459.1 | Cytochrome P450 11A1                                                                                                                                                                                 | opposite | 41004   | 10.3721    |
| 15  | ENSG00000140470.2 | "ADAMTS-17 precursor (EC 3.4.24.-) (A disintegrin and metalloproteinase with thrombospondin motifs 17) (ADAM-TS 17) (ADAM-TS17). [Source:SWISSPROT;Acc:Q8TE56]"                                      | opposite | 41116   | 4.61201    |
| 15  | ENSG00000140543.3 | "de-etiolated 1. [Source:RefSeq;Acc:NM_017996]"                                                                                                                                                      | opposite | 41071   | 21.3575    |
| 15  | ENSG00000154227.3 | "LAG1 longevity assurance homolog 3. [Source:RefSeq;Acc:NM_178842]"                                                                                                                                  | opposite | 41119   | 15.7494    |
| 15  | ENSG00000167014.2 | (blank)                                                                                                                                                                                              | same     | 40911   | 10.658     |
| 15  |                   |                                                                                                                                                                                                      |          | 40912   | 12.9224    |
| 15  | ENSG00000175921.4 | (blank)                                                                                                                                                                                              | opposite | 41038   | 20.1479    |
| 15  | ENSG00000183083.4 | (blank)                                                                                                                                                                                              | opposite | 41487   | 20.9184    |
| 15  | ENSG00000186322.3 | (blank)                                                                                                                                                                                              | opposite | 41049   | 21.3049    |
| 15  | ENSG00000186702.3 | (blank)                                                                                                                                                                                              | opposite | 41053   | 21.1476    |
| 16  | ENSG00000077754.4 | "Leucine carboxyl methyltransferase 1 (EC 2.1.1.-) (Protein-leucine O- methyltransferase) (CGI-68). [Source:SWISSPROT;Acc:Q9UIC8]"                                                                   | opposite | 41904   | 14.3691    |
| 16  | ENSG00000102879.3 | "Coronin-like protein p57 (Coronin 1A). [Source:SWISSPROT;Acc:P31146]"                                                                                                                               | same     | 41619   | 3.68897    |
| 16  | ENSG00000103196.1 | (blank)                                                                                                                                                                                              | opposite | 42138   | 6.91351    |
| 16  | ENSG00000129636.2 | "T-cell immunomodulatory protein. [Source:RefSeq;Acc:NM_030790]"                                                                                                                                     | opposite | 41696   | 0.739214   |
| 16  | ENSG00000140650.2 | "Phosphomannomutase 2 (EC 5.4.2.8) (PMM 2). [Source:SWISSPROT;Acc:O15305]"                                                                                                                           | opposite | 41855   | 14.8225    |
| 16  | ENSG00000141037.3 | "Tubulin beta-4 chain (Tubulin beta-III). [Source:SWISSPROT;Acc:Q13509]"                                                                                                                             | same     | 41840   | 5.55224    |
| 16  | ENSG00000152910.4 | "Contactin associated protein-like 4 precursor (Cell recognition molecule Caspr4). [Source:SWISSPROT;Acc:Q9C0A0]"                                                                                    | opposite | 42116   | 4.58585    |
| 16  | ENSG00000155718.4 | (blank)                                                                                                                                                                                              | opposite | 41897   | 19.9941    |
| 16  | ENSG00000161980.2 | "DNA-directed RNA polymerases III 12.5 kDa polypeptide (EC 2.7.7.6) (RNA polymerase III C11 subunit) (HsC11p) (hRPC11) (My010 protein). [Source:SWISSPROT;Acc:Q9Y2Y1]"                               | opposite | 41559   | 7.27511    |
| 16  | ENSG00000166501.2 | Protein kinase C                                                                                                                                                                                     | same     | 41598   | 6.50333    |
| 16  | ENSG00000166669.4 | "activating transcription factor 7 interacting protein 2. [Source:RefSeq;Acc:NM_024997]"                                                                                                             | opposite | 41863   | 4.53923    |
| 16  | ENSG00000166743.2 | "acetyl-Coenzyme A synthetase 3; medium-chain acyl-CoA synthetase; Butyrate CoA ligase. [Source:RefSeq;Acc:NM_052956]"                                                                               | opposite | 41587   | 3.7821     |
| 16  |                   |                                                                                                                                                                                                      |          | 41588   | 4.97073    |
| 16  |                   |                                                                                                                                                                                                      |          | 41591   | 13.2549    |
| 16  | ENSG00000167411.5 | "Zinc finger protein 267 (Zinc finger protein HZF2). [Source:SWISSPROT;Acc:Q14586]"                                                                                                                  | opposite | 41921   | 19.29      |

| Chr | Ensembl id        | Description                                                                                                                                                                  | Strand   | HERV id | HERV score |
|-----|-------------------|------------------------------------------------------------------------------------------------------------------------------------------------------------------------------|----------|---------|------------|
| 16  | ENSG00000170537.3 | "transmembrane channel-like 7. [Source:RefSeq;Acc:NM_024847]"                                                                                                                | opposite | 41880   | 5.78048    |
| 16  |                   |                                                                                                                                                                              |          | 41881   | 11.6965    |
| 16  | ENSG00000185984.3 | "LAT1-3TM protein. [Source:RefSeq;Acc:NM_031211]"                                                                                                                            | opposite | 41615   | 3.42924    |
| 17  | ENSG00000005271.3 | "Neurofibromin (Neurofibromatosis-related protein NF-1) [Contains: Neurofibromin truncated]. [Source:SWISSPROT;Acc:P21359]"                                                  | same     | 42216   | 4.95979    |
| 17  | ENSG00000007171.4 | Nitric oxide synthase                                                                                                                                                        | same     | 42445   | 19.0274    |
| 17  |                   |                                                                                                                                                                              | opposite | 42205   | 9.43979    |
| 17  |                   |                                                                                                                                                                              |          | 42206   | 15.2117    |
| 17  |                   |                                                                                                                                                                              |          | 42207   | 18.8403    |
| 17  | ENSG00000074755.2 | zinc finger                                                                                                                                                                  | same     | 42376   | 8.03147    |
| 17  | ENSG00000125447.5 | ADP-ribosylation factor binding protein GGA3 (Golgi-localized                                                                                                                | opposite | 42364   | 10.8174    |
| 17  | ENSG00000129657.2 | "SEC14-like protein 1. [Source:SWISSPROT;Acc:Q92503]"                                                                                                                        | opposite | 42603   | 7.74055    |
| 17  | ENSG00000132142.5 | "Acetyl-CoA carboxylase 1 (EC 6.4.1.2) (ACC-alpha) [Includes: Biotin carboxylase (EC 6.3.4.14)]. [Source:SWISSPROT;Acc:Q13085]"                                              | opposite | 42251   | 30.5029    |
| 17  | ENSG00000133195.1 | solute carrier family 39 (metal ion transporter)                                                                                                                             | opposite | 42355   | 3.21131    |
| 17  | ENSG00000141198.4 | "TOM1-like 1 protein (Target of myb-like 1 protein) (Src activating and signaling molecule protein). [Source:SWISSPROT;Acc:O75674]"                                          | opposite | 42560   | 2.98401    |
| 17  | ENSG00000161583.4 | "TBC1 domain family member 3 (Rab GTPase-activating protein PRC17) (Prostate cancer gene 17 protein) (TRE17 alpha protein). [Source:SWISSPROT;Acc:Q8IZP1]"                   | opposite | 42249   | 6.98371    |
| 17  |                   |                                                                                                                                                                              |          | 42250   | 7.42877    |
| 17  | ENSG00000166260.1 | Cytochrome c oxidase assembly protein COX11                                                                                                                                  | same     | 42560   | 2.98401    |
| 17  | ENSG00000166263.2 | "syntaxin binding protein 4. [Source:RefSeq;Acc:NM_178509]"                                                                                                                  | opposite | 42563   | 17.054     |
| 17  | ENSG00000167080.1 | UDP-GalNAc:Neu5Acalpha2-3Galbeta-R beta1                                                                                                                                     | opposite | 42502   | 2.34744    |
| 17  | ENSG00000175711.2 | (blank)                                                                                                                                                                      | opposite | 42371   | 4.17354    |
| 17  | ENSG00000176658.4 | "Myosin Id. [Source:SWISSPROT;Acc:O94832]"                                                                                                                                   | opposite | 42225   | 4.5055     |
| 17  | ENSG00000176927.2 | (blank)                                                                                                                                                                      | same     | 42213   | 4.77594    |
| 17  |                   |                                                                                                                                                                              |          | 42214   | 3.12674    |
| 17  |                   |                                                                                                                                                                              | opposite | 42458   | 20.3021    |
| 17  | ENSG00000178743.2 | (blank)                                                                                                                                                                      | same     | 42492   | 4.10566    |
| 17  | ENSG00000182205.1 | (blank)                                                                                                                                                                      | opposite | 42370   | 12.7882    |
| 17  | ENSG00000182352.1 | (blank)                                                                                                                                                                      | same     | 42359   | 8.04227    |
| 18  | ENSG00000053747.3 | "Laminin alpha-3 chain precursor (Epligrin 170 kDa subunit) (E170) (Nicein alpha subunit). [Source:SWISSPROT;Acc:Q16787]"                                                    | opposite | 43369   | 4.70302    |
| 18  | ENSG00000067900.1 | Rho-associated                                                                                                                                                               | same     | 43365   | 6.28499    |
| 18  | ENSG00000078043.3 | "protein inhibitor of activated STAT X isoform alpha. [Source:RefSeq;Acc:NM_173206]"                                                                                         | opposite | 42990   | 17.964     |
| 18  | ENSG00000132204.4 | (blank)                                                                                                                                                                      | opposite | 42614   | 5.33716    |
| 18  | ENSG00000134759.2 | "elongator protein 2; signal transducer and activator of transcription interacting protein 1. [Source:RefSeq;Acc:NM_018255]"                                                 | opposite | 43499   | 1.69598    |
| 18  | ENSG00000134769.4 | "Dystrobrevin alpha (Dystrobrevin-alpha). [Source:SWISSPROT;Acc:Q9Y4J8]"                                                                                                     | opposite | 43493   | 6.69582    |
| 18  | ENSG00000141384.1 | "Transcription initiation factor TFIID 105 kDa subunit (TAFII-105) (TAFII105) (Fragment). [Source:SWISSPROT;Acc:Q92750]"                                                     | same     | 42710   | 3.07916    |
| 18  |                   |                                                                                                                                                                              | opposite | 43386   | 23.8059    |
| 18  | ENSG00000141404.2 | Guanine nucleotide-binding protein G(olf)                                                                                                                                    | opposite | 43339   | 4.045      |
| 18  | ENSG00000150477.1 | (blank)                                                                                                                                                                      | opposite | 43502   | 8.08561    |
| 18  | ENSG00000152214.1 | "GTP-binding protein Rit2 (Ras-like protein expressed in neurons) (Ras-like without CAAX protein 2). [Source:SWISSPROT;Acc:Q99578]"                                          | opposite | 42942   | 15.6531    |
| 18  | ENSG00000152234.1 | ATP synthase alpha chain                                                                                                                                                     | same     | 43600   | 0.907923   |
| 18  | ENSG00000166401.2 | "Plasminogen activator inhibitor-2 precursor (PAI-2) (Placental plasminogen activator inhibitor) (Monocyte Arg-serpin) (Urokinase inhibitor). [Source:SWISSPROT;Acc:P05120]" | opposite | 43705   | 6.95798    |
| 18  | ENSG00000166960.4 | (blank)                                                                                                                                                                      | opposite | 42828   | 7.85805    |
| 18  | ENSG00000167216.4 | (blank)                                                                                                                                                                      | opposite | 43602   | 6.47439    |



| Chr | Ensembl id        | Description                                                                                                                                                             | Strand   | HERV id | HERV score |
|-----|-------------------|-------------------------------------------------------------------------------------------------------------------------------------------------------------------------|----------|---------|------------|
| 18  | ENSG00000171791.5 | "Apoptosis regulator Bcl-2. [Source:SWISSPROT;Acc:P10415]"                                                                                                              | same     | 43693   | 3.81945    |
| 18  | ENSG00000177150.2 | (blank)                                                                                                                                                                 | same     | 43343   | 3.81154    |
| 18  | ENSG00000183287.2 | (blank)                                                                                                                                                                 | opposite | 43058   | 2.77878    |
| 18  | ENSG00000187323.1 | "Tumor suppressor protein DCC precursor (Colorectal cancer suppressor). [Source:SWISSPROT;Acc:P43146]"                                                                  | opposite | 43620   | 6.91324    |
| 18  |                   |                                                                                                                                                                         |          | 43621   | 7.16478    |
| 19  | ENSG0000011485.2  | "Serine/threonine protein phosphatase 5 (EC 3.1.3.16) (PP5) (Protein phosphatase T) (PP-T) (PPT). [Source:SWISSPROT;Acc:P53041]"                                        | same     | 44176   | 3.04274    |
| 19  | ENSG00000081665.2 | "Zinc finger protein 93 (Zinc finger protein HTF34) (Fragment). [Source:SWISSPROT;Acc:P35789]"                                                                          | same     | 43981   | 4.28313    |
| 19  | ENSG00000083844.1 | "Zinc finger protein 264. [Source:SWISSPROT;Acc:O43296]"                                                                                                                | same     | 44229   | 3.87975    |
| 19  |                   |                                                                                                                                                                         | opposite | 44590   | 7.62708    |
| 19  | ENSG00000089335.5 | "Zinc finger protein 302 (ZNF135-like) (ZNF140-like). [Source:SWISSPROT;Acc:Q9NR11]"                                                                                    | same     | 44134   | 9.21229    |
| 19  | ENSG00000104804.1 | "Tubby related protein 2 (Tubby-like protein 2). [Source:SWISSPROT;Acc:O00295]"                                                                                         | opposite | 44180   | 0.772488   |
| 19  | ENSG00000104823.1 | Delta3                                                                                                                                                                  | opposite | 44142   | 13.8371    |
| 19  | ENSG00000105708.3 | "Zinc finger protein 14 (Zinc finger protein KOX6) (Gonadotropin inducible transcription repressor-4) (GIOT-4). [Source:SWISSPROT;Acc:P17017]"                          | same     | 44292   | 7.2751     |
| 19  |                   |                                                                                                                                                                         |          | 44297   | 2.18992    |
| 19  |                   |                                                                                                                                                                         | opposite | 43979   | 4.69775    |
| 19  |                   |                                                                                                                                                                         |          | 43980   | 4.10481    |
| 19  |                   |                                                                                                                                                                         |          | 43981   | 4.28313    |
| 19  |                   |                                                                                                                                                                         |          | 43982   | 20.3657    |
| 19  |                   |                                                                                                                                                                         |          | 43983   | 4.6997     |
| 19  | ENSG00000105750.3 | "Zinc finger protein 85 (Zinc finger protein HPF4) (HTF1). [Source:SWISSPROT;Acc:Q03923]"                                                                               | same     | 44009   | 4.33461    |
| 19  | ENSG00000118613.4 | "Zinc finger protein 43 (Zinc protein HTF6) (Zinc finger protein KOX27). [Source:SWISSPROT;Acc:P17038]"                                                                 | same     | 44358   | 17.8516    |
| 19  |                   |                                                                                                                                                                         | opposite | 44028   | 19.2179    |
| 19  |                   |                                                                                                                                                                         |          | 44030   | 5.70205    |
| 19  | ENSG00000120777.4 | "zinc finger protein 565. [Source:RefSeq;Acc:NM_152477]"                                                                                                                | same     | 44451   | 16.168     |
| 19  |                   |                                                                                                                                                                         |          | 44454   | 19.0334    |
| 19  |                   |                                                                                                                                                                         | opposite | 44138   | 5.81728    |
| 19  | ENSG00000120782.4 | "Zinc finger protein 268 (Zinc finger protein HZF3). [Source:SWISSPROT;Acc:Q14587]"                                                                                     | same     | 44465   | 17.9989    |
| 19  |                   |                                                                                                                                                                         | opposite | 44139   | 0.974575   |
| 19  | ENSG00000127903.5 | "Zinc finger imprinted 2. [Source:SWISSPROT;Acc:Q9NZV7]"                                                                                                                | opposite | 44219   | 3.21057    |
| 19  |                   |                                                                                                                                                                         |          | 44223   | 9.14407    |
| 19  | ENSG00000130607.4 | "Cytochrome P450 2B6 (EC 1.14.14.1) (CYP11B6) (P450 I1B1). [Source:SWISSPROT;Acc:P20813]"                                                                               | same     | 44150   | 11.1901    |
| 19  |                   |                                                                                                                                                                         | opposite | 44474   | 5.33944    |
| 19  | ENSG00000153896.4 | (blank)                                                                                                                                                                 | same     | 44441   | 15.5296    |
| 19  |                   |                                                                                                                                                                         |          | 44443   | 6.89948    |
| 19  |                   |                                                                                                                                                                         | opposite | 44134   | 9.21229    |
| 19  | ENSG00000153902.2 | "Leucine-rich repeat LGI family member 4 precursor (Leucine-rich glioma-inactivated protein 4) (LGI1-like protein 3) (UNQ6515/PRO21485). [Source:SWISSPROT;Acc:Q8N135]" | same     | 44446   | 1.62204    |
| 19  | ENSG00000160321.3 | "Zinc finger protein 257 (Bone marrow zinc finger 4) (BMZF-4). [Source:SWISSPROT;Acc:Q9Y2Q1]"                                                                           | same     | 44306   | 10.1881    |
| 19  |                   |                                                                                                                                                                         |          | 44307   | 2.4557     |
| 19  |                   |                                                                                                                                                                         |          | 44311   | 1.62587    |
| 19  |                   |                                                                                                                                                                         |          | 44312   | 16.8309    |
| 19  |                   |                                                                                                                                                                         |          | 44313   | 18.3195    |
| 19  |                   |                                                                                                                                                                         | opposite | 44000   | 1.63676    |

| Chr | Ensembl id        | Description                                                                                                                                                                       | Strand   | HERV id | HERV score |
|-----|-------------------|-----------------------------------------------------------------------------------------------------------------------------------------------------------------------------------|----------|---------|------------|
| 19  |                   |                                                                                                                                                                                   |          | 44001   | 1.34151    |
| 19  |                   |                                                                                                                                                                                   |          | 44002   | 6.21861    |
| 19  | ENSG00000160336.4 | "Similar to zinc finger protein 268 (Fragment). [Source:SPTREMBL;Acc:Q961R2]"                                                                                                     | same     | 44207   | 22.8665    |
| 19  |                   |                                                                                                                                                                                   |          | 44208   | 14.0258    |
| 19  |                   |                                                                                                                                                                                   | opposite | 44567   | 1.67014    |
| 19  |                   |                                                                                                                                                                                   |          | 44568   | 5.59592    |
| 19  |                   |                                                                                                                                                                                   |          | 44570   | 19.357     |
| 19  |                   |                                                                                                                                                                                   |          | 44571   | 15.5196    |
| 19  | ENSG00000161241.4 | "F-box only protein 26. [Source:SWISSPROT;Acc:Q96EF6]"                                                                                                                            | same     | 44467   | 19.3027    |
| 19  | ENSG00000161640.2 | "Sialic acid binding Ig-like lectin 11 precursor (Siglec-11) (Sialic acid-binding lectin 11) (UNQ9222/PRO28718). [Source:SWISSPROT;Acc:Q96RL6]"                                   | opposite | 44183   | 4.88562    |
| 19  | ENSG00000166704.3 | (blank)                                                                                                                                                                           | opposite | 44234   | 16.6277    |
| 19  | ENSG00000167232.4 | "Zinc finger protein 91 (Zinc finger protein HTF10) (HPF7). [Source:SWISSPROT;Acc:Q05481]"                                                                                        | same     | 44394   | 4.60459    |
| 19  |                   |                                                                                                                                                                                   |          | 44395   | 5.15455    |
| 19  |                   |                                                                                                                                                                                   |          | 44396   | 14.5704    |
| 19  |                   |                                                                                                                                                                                   |          | 44401   | 2.87694    |
| 19  |                   |                                                                                                                                                                                   | opposite | 44083   | 14.8783    |
| 19  |                   |                                                                                                                                                                                   |          | 44084   | 7.39788    |
| 19  |                   |                                                                                                                                                                                   |          | 44086   | 19.3404    |
| 19  |                   |                                                                                                                                                                                   |          | 44088   | 19.4834    |
| 19  |                   |                                                                                                                                                                                   |          | 44089   | 3.62957    |
| 19  | ENSG00000167584.4 | "Cytochrome P450 2A6 (EC 1.14.14.1) (CYP11A6) (Coumarin 7-hydroxylase) (IIA3) (CYP2A3) (P450(I)). [Source:SWISSPROT;Acc:P11509]"                                                  | same     | 44473   | 0.956594   |
| 19  |                   |                                                                                                                                                                                   |          | 44474   | 5.33944    |
| 19  |                   |                                                                                                                                                                                   | opposite | 44149   | 0.965386   |
| 19  |                   |                                                                                                                                                                                   |          | 44150   | 11.1901    |
| 19  | ENSG00000167637.5 | "Zinc finger protein 345 (Zinc finger protein HZF10). [Source:SWISSPROT;Acc:Q14585]"                                                                                              | opposite | 44463   | 21.2112    |
| 19  | ENSG00000167766.4 | "Zinc finger protein 432. [Source:SWISSPROT;Acc:O94892]"                                                                                                                          | same     | 44556   | 22.3998    |
| 19  |                   |                                                                                                                                                                                   |          | 44557   | 16.4288    |
| 19  |                   |                                                                                                                                                                                   |          | 44559   | 15.8594    |
| 19  |                   |                                                                                                                                                                                   |          | 44560   | 12.8129    |
| 19  |                   |                                                                                                                                                                                   |          | 44561   | 22.0824    |
| 19  |                   |                                                                                                                                                                                   |          | 44562   | 18.8392    |
| 19  |                   |                                                                                                                                                                                   | opposite | 44194   | 13.8978    |
| 19  |                   |                                                                                                                                                                                   |          | 44195   | 7.86036    |
| 19  |                   |                                                                                                                                                                                   |          | 44196   | 7.22816    |
| 19  |                   |                                                                                                                                                                                   |          | 44197   | 5.17791    |
| 19  | ENSG00000171032.1 | "zinc finger protein 350; zinc-finger protein ZBRK1. [Source:RefSeq;Acc:NM_021632]"                                                                                               | opposite | 44188   | 8.16138    |
| 19  | ENSG00000171124.1 | "Galactoside 3(4)-L-fucosyltransferase (EC 2.4.1.65) (Blood group Lewis alpha-4-fucosyltransferase) (Lewis FT) (Fucosyltransferase 3) (FUCT- III). [Source:SWISSPROT;Acc:P21217]" | opposite | 43922   | 6.85232    |
| 19  | ENSG00000171295.2 | "Zinc finger protein 440. [Source:SWISSPROT;Acc:Q81YI8]"                                                                                                                          | same     | 43958   | 4.10025    |
| 19  |                   |                                                                                                                                                                                   | opposite | 44276   | 13.4425    |
| 19  |                   |                                                                                                                                                                                   |          | 44277   | 17.7986    |
| 19  | ENSG00000171817.4 | "zinc finger protein 540. [Source:RefSeq;Acc:NM_152606]"                                                                                                                          | opposite | 44465   | 17.9989    |

| Chr | Ensembl id        | Description                                                                                    | Strand   | HERV id | HERV score |
|-----|-------------------|------------------------------------------------------------------------------------------------|----------|---------|------------|
| 19  | ENSG00000172687.3 | "Zinc finger protein 431. [Source:SWISSPROT;Acc:Q8TF32]"                                       | same     | 44014   | 10.8908    |
| 19  |                   |                                                                                                |          | 44015   | 21.198     |
| 19  |                   |                                                                                                |          | 44016   | 10.8448    |
| 19  |                   |                                                                                                | opposite | 44336   | 17.274     |
| 19  |                   |                                                                                                |          | 44342   | 20.7367    |
| 19  |                   |                                                                                                |          | 44345   | 13.3304    |
| 19  |                   |                                                                                                |          | 44346   | 10.7842    |
| 19  | ENSG00000173875.2 | "Zinc finger protein 136. [Source:SWISSPROT;Acc:P52737]"                                       | same     | 43962   | 25.0493    |
| 19  |                   |                                                                                                | opposite | 44279   | 18.9661    |
| 19  |                   |                                                                                                |          | 44280   | 8.36646    |
| 19  | ENSG00000174652.5 | "Zinc finger protein 266 (Zinc finger protein HZF1) (Fragment). [Source:SWISSPROT;Acc:Q14584]" | same     | 44257   | 23.7984    |
| 19  |                   |                                                                                                |          | 44258   | 4.93282    |
| 19  |                   |                                                                                                |          | 44260   | 8.86384    |
| 19  |                   |                                                                                                |          | 44261   | 17.6809    |
| 19  |                   |                                                                                                |          | 44264   | 51.056     |
| 19  |                   |                                                                                                |          | 44265   | 17.558     |
| 19  |                   |                                                                                                |          | 44266   | 21.0332    |
| 19  |                   |                                                                                                | opposite | 43944   | 3.40306    |
| 19  |                   |                                                                                                |          | 43946   | 16.7445    |
| 19  |                   |                                                                                                |          | 43947   | 7.38769    |
| 19  |                   |                                                                                                |          | 43948   | 23.0357    |
| 19  |                   |                                                                                                |          | 43949   | 5.41783    |
| 19  |                   |                                                                                                |          | 43951   | 22.466     |
| 19  |                   |                                                                                                |          | 43952   | 7.75645    |
| 19  |                   |                                                                                                |          | 43954   | 7.78534    |
| 19  |                   |                                                                                                |          | 43955   | 26.5737    |
| 19  |                   |                                                                                                |          | 43956   | 7.1718     |
| 19  | ENSG00000176024.4 | "zinc finger protein 613. [Source:RefSeq;Acc:NM_024840]"                                       | same     | 44188   | 8.16138    |
| 19  |                   |                                                                                                | opposite | 44555   | 3.66598    |
| 19  |                   |                                                                                                |          | 44556   | 22.3998    |
| 19  |                   |                                                                                                |          | 44557   | 16.4288    |
| 19  |                   |                                                                                                |          | 44559   | 15.8594    |
| 19  |                   |                                                                                                |          | 44560   | 12.8129    |
| 19  | ENSG00000176293.5 | "Zinc finger protein 135. [Source:SWISSPROT;Acc:P52742]"                                       | same     | 44234   | 16.6277    |
| 19  |                   |                                                                                                | opposite | 44595   | 4.8468     |
| 19  | ENSG00000176379.5 | "Zinc finger protein ZFP-36 (Fragment). [Source:SWISSPROT;Acc:P16415]"                         | same     | 44276   | 13.4425    |
| 19  |                   |                                                                                                |          | 44277   | 17.7986    |
| 19  |                   |                                                                                                |          | 44278   | 6.84685    |
| 19  |                   |                                                                                                | opposite | 43958   | 4.10025    |
| 19  |                   |                                                                                                |          | 43959   | 19.5812    |
| 19  | ENSG00000179847.2 | "Similar to zinc finger protein 137 (Clone pHZ-30). [Source:SPTREMBL;Acc:Q9BVV0]"              | same     | 44207   | 22.8665    |
| 19  |                   |                                                                                                |          | 44208   | 14.0258    |
| 19  |                   |                                                                                                | opposite | 44567   | 1.67014    |
| 19  |                   |                                                                                                |          | 44568   | 5.59592    |

| Chr | Ensembl id        | Description                                                                                                                                                                                                                               | Strand   | HERV id | HERV score |
|-----|-------------------|-------------------------------------------------------------------------------------------------------------------------------------------------------------------------------------------------------------------------------------------|----------|---------|------------|
| 19  | ENSG00000180081.4 | "Similar to zinc finger protein 254 (Fragment). [Source:SPTREMBL;Acc:Q86Y87]"                                                                                                                                                             | same     | 44080   | 17.4921    |
| 19  |                   |                                                                                                                                                                                                                                           |          | 44081   | 17.8708    |
| 19  |                   |                                                                                                                                                                                                                                           |          | 44083   | 14.8783    |
| 19  |                   |                                                                                                                                                                                                                                           |          | 44084   | 7.39788    |
| 19  |                   |                                                                                                                                                                                                                                           |          | 44086   | 19.3404    |
| 19  |                   |                                                                                                                                                                                                                                           |          | 44088   | 19.4834    |
| 19  |                   |                                                                                                                                                                                                                                           |          | 44089   | 3.62957    |
| 19  |                   |                                                                                                                                                                                                                                           |          | 44090   | 11.4519    |
| 19  |                   |                                                                                                                                                                                                                                           |          | 44092   | 6.46375    |
| 19  |                   |                                                                                                                                                                                                                                           |          | 44093   | 5.7488     |
| 19  |                   |                                                                                                                                                                                                                                           | opposite | 44388   | 11.938     |
| 19  |                   |                                                                                                                                                                                                                                           |          | 44389   | 8.11275    |
| 19  |                   |                                                                                                                                                                                                                                           |          | 44390   | 13.9793    |
| 19  |                   |                                                                                                                                                                                                                                           |          | 44391   | 7.58913    |
| 19  |                   |                                                                                                                                                                                                                                           |          | 44394   | 4.60459    |
| 19  |                   |                                                                                                                                                                                                                                           |          | 44395   | 5.15455    |
| 19  |                   |                                                                                                                                                                                                                                           |          | 44396   | 14.5704    |
| 19  |                   |                                                                                                                                                                                                                                           |          | 44401   | 2.87694    |
| 19  |                   |                                                                                                                                                                                                                                           |          | 44404   | 17.7179    |
| 19  |                   |                                                                                                                                                                                                                                           |          | 44406   | 17.423     |
| 19  |                   |                                                                                                                                                                                                                                           |          | 44407   | 9.63777    |
| 19  | ENSG00000180855.5 | "Zinc finger protein 442. [Source:SWISSPROT;Acc:Q9H7R0]"                                                                                                                                                                                  | same     | 44280   | 8.36646    |
| 19  |                   |                                                                                                                                                                                                                                           | opposite | 43962   | 25.0493    |
| 19  | ENSG00000181515.1 | (blank)                                                                                                                                                                                                                                   | opposite | 43979   | 4.69775    |
| 19  | ENSG00000182797.1 | (blank)                                                                                                                                                                                                                                   | opposite | 44485   | 6.74025    |
| 19  | ENSG00000183668.3 | "Pregnancy-specific beta-1-glycoprotein 9 precursor (PSBG-9) (Pregnancy-specific glycoprotein 9) (Pregnancy-specific beta-1 glycoprotein B) (PS-beta-B) (PS34) (Pregnancy-specific glycoprotein 7) (PSG7). [Source:SWISSPROT;Acc:Q00887]" | same     | 44515   | 3.29563    |
| 19  | ENSG00000184635.3 | "Zinc finger protein 208. [Source:SWISSPROT;Acc:Q43345]"                                                                                                                                                                                  | same     | 44373   | 4.53969    |
| 19  |                   |                                                                                                                                                                                                                                           |          | 44374   | 6.72006    |
| 19  |                   |                                                                                                                                                                                                                                           |          | 44375   | 9.56732    |
| 19  |                   |                                                                                                                                                                                                                                           |          | 44381   | 19.5562    |
| 19  |                   |                                                                                                                                                                                                                                           | opposite | 44045   | 6.83316    |
| 19  |                   |                                                                                                                                                                                                                                           |          | 44054   | 4.19621    |
| 19  |                   |                                                                                                                                                                                                                                           |          | 44055   | 8.06392    |
| 19  |                   |                                                                                                                                                                                                                                           |          | 44057   | 17.9076    |
| 19  |                   |                                                                                                                                                                                                                                           |          | 44058   | 16.9326    |
| 19  |                   |                                                                                                                                                                                                                                           |          | 44063   | 15.7701    |
| 19  |                   |                                                                                                                                                                                                                                           |          | 44066   | 3.79144    |
| 19  |                   |                                                                                                                                                                                                                                           |          | 44069   | 6.28429    |
| 19  |                   |                                                                                                                                                                                                                                           |          | 44070   | 8.13274    |
| 19  | ENSG00000188114.1 | "Pregnancy-specific beta-1-glycoprotein 5 precursor (PSBG-5) (Fetal liver non-specific cross-reactive antigen-3) (FL-NCA-3). [Source:SWISSPROT;Acc:Q15238]"                                                                               | same     | 44510   | 5.95232    |
| 19  | ENSG00000188629.1 | "Zinc finger protein 177. [Source:SWISSPROT;Acc:Q13360]"                                                                                                                                                                                  | opposite | 44258   | 4.93282    |
| 19  | ENSG00000189329.1 | "Pregnancy-specific beta-1-glycoprotein 2 precursor (PSBG-2) (Pregnancy-specific beta-1 glycoprotein E) (PS-beta-E).                                                                                                                      | same     | 44505   | 6.44603    |

| Chr | Ensembl id        | Description                                                                                                                                                                                                                              | Strand   | HERV id | HERV score |
|-----|-------------------|------------------------------------------------------------------------------------------------------------------------------------------------------------------------------------------------------------------------------------------|----------|---------|------------|
|     |                   | [Source:SWISSPROT;Acc:P11465]"                                                                                                                                                                                                           |          |         |            |
| 20  | ENSG00000101080.5 | "Zinc finger protein 335. [Source:SWISSPROT;Acc:Q9H4Z2]"                                                                                                                                                                                 | same     | 44856   | 6.3276     |
| 20  | ENSG00000101280.1 | "Angiopoietin-4 precursor (ANG-4) (ANG-3). [Source:SWISSPROT;Acc:Q9Y264]"                                                                                                                                                                | opposite | 44603   | 6.89256    |
| 20  | ENSG00000101292.1 | "Prokineticin receptor 2 (PK-R2) (G protein-coupled receptor 73-like 1) (GPR73b) (GPRg2). [Source:SWISSPROT;Acc:Q8NFJ6]"                                                                                                                 | opposite | 44610   | 21.0559    |
| 20  | ENSG00000101310.3 | "Protein transport protein Sec23B (SEC23-related protein B). [Source:SWISSPROT;Acc:Q15437]"                                                                                                                                              | opposite | 44794   | 19.0194    |
| 20  | ENSG00000124177.5 | "Chromodomain-helicase-DNA-binding protein 5 (CHD-5). [Source:SWISSPROT;Acc:Q8TD26]"                                                                                                                                                     | opposite | 44696   | 5.85452    |
| 20  | ENSG00000177410.1 | (blank)                                                                                                                                                                                                                                  | opposite | 44860   | 5.56973    |
| 20  | ENSG00000182621.4 | 1-phosphatidylinositol-4                                                                                                                                                                                                                 | same     | 44622   | 5.04029    |
| 21  | ENSG00000155258.5 | (blank)                                                                                                                                                                                                                                  | same     | 44889   | 13.9354    |
| 21  | ENSG00000159082.4 | Synaptojanin 1 (EC 3.1.3.36) (Synaptic inositol-1                                                                                                                                                                                        | opposite | 45112   | 22.4513    |
| 21  | ENSG00000159113.1 | "Interleukin-10 receptor beta chain precursor (IL-10R-B) (IL-10R2) (Cytokine receptor class-II CRF2-4). [Source:SWISSPROT;Acc:Q08334]"                                                                                                   | opposite | 45420   | 4.05077    |
| 21  | ENSG00000174496.3 | "C21ORF34 (Fragment). [Source:SPTREMBL;Acc:Q8TDA7]"                                                                                                                                                                                      | opposite | 45167   | 11.9833    |
| 21  | ENSG00000182240.3 | "Beta secretase 2 precursor (EC 3.4.23.45) (Beta-site APP-cleaving enzyme 2) (Aspartyl protease 1) (Asp 1) (ASP1) (Membrane-associated aspartic protease 1) (Memapsin-1) (Down region aspartic protease). [Source:SWISSPROT;Acc:Q9Y5Z0]" | opposite | 45440   | 2.3051     |
| 21  |                   |                                                                                                                                                                                                                                          |          | 45441   | 7.26775    |
| 21  | ENSG00000183570.1 | "Poly(rC)-binding protein 3 (Alpha-CP3). [Source:SWISSPROT;Acc:P57721]"                                                                                                                                                                  | opposite | 45457   | 1.26542    |
| 21  | ENSG00000188992.1 | "membrane-associated phospholipase A1 beta. [Source:RefSeq;Acc:NM_198996]"                                                                                                                                                               | opposite | 44895   | 20.5765    |
| 22  | ENSG00000077942.5 | "Fibulin-1 precursor. [Source:SWISSPROT;Acc:P23142]"                                                                                                                                                                                     | opposite | 45647   | 5.78333    |
| 22  | ENSG00000100055.5 | "Cytohesin 4. [Source:SWISSPROT;Acc:Q9UIA0]"                                                                                                                                                                                             | opposite | 45638   | 3.74213    |
| 22  | ENSG00000100208.5 | "Ig lambda chain C regions. [Source:SWISSPROT;Acc:P01842]"                                                                                                                                                                               | same     | 45492   | 5.86162    |
| 22  |                   |                                                                                                                                                                                                                                          |          | 45493   | 6.82621    |
| 22  |                   |                                                                                                                                                                                                                                          | opposite | 45601   | 3.24553    |
| 22  |                   |                                                                                                                                                                                                                                          |          | 45606   | 5.24321    |
| 22  | ENSG00000176177.4 | (blank)                                                                                                                                                                                                                                  | opposite | 45538   | 3.0208     |
| 22  | ENSG00000184470.4 | Thioredoxin reductase 2                                                                                                                                                                                                                  | opposite | 45479   | 10.4055    |
| 22  | ENSG00000185686.4 | "Melanoma antigen preferentially expressed in tumors (Preferentially expressed antigen of melanoma) (OPA-interacting protein 4) (OIP4). [Source:SWISSPROT;Acc:P78395]"                                                                   | same     | 45595   | 3.79978    |
| 22  |                   |                                                                                                                                                                                                                                          |          | 45599   | 4.46853    |
| 22  |                   |                                                                                                                                                                                                                                          |          | 45600   | 7.85685    |
| 22  |                   |                                                                                                                                                                                                                                          |          | 45601   | 3.24553    |
| 22  |                   |                                                                                                                                                                                                                                          | opposite | 45492   | 5.86162    |
| X   | ENSG00000008056.4 | "Synapsin I (Brain protein 4.1). [Source:SWISSPROT;Acc:P17600]"                                                                                                                                                                          | opposite | 407     | 4.17495    |
| X   | ENSG00000072315.1 | "Short transient receptor potential channel 5 (TrpC5) (Htrp-5) (Htrp5). [Source:SWISSPROT;Acc:Q9UL62]"                                                                                                                                   | same     | 3178    | 4.58449    |
| X   | ENSG00000080561.1 | "Midline 2 protein (Midline defect 2) (Tripartite motif protein 1) (Midin 2). [Source:SWISSPROT;Acc:Q9UJV3]"                                                                                                                             | opposite | 3145    | 24.2944    |
| X   | ENSG00000083750.2 | "Ras-related GTP binding B short isoform; GTP-binding protein ragB. [Source:RefSeq;Acc:NM_006064]"                                                                                                                                       | opposite | 2315    | 4.67583    |
| X   | ENSG00000089472.3 | "hephaestin isoform a. [Source:RefSeq;Acc:NM_138737]"                                                                                                                                                                                    | opposite | 2431    | 10.2696    |
| X   | ENSG00000101844.5 | "autophagy-related cysteine endopeptidase 2 isoform a; autophagy-related cysteine endopeptidase 2; AUT-like 2"                                                                                                                           | opposite | 3149    | 3.21757    |
| X   |                   |                                                                                                                                                                                                                                          |          | 3150    | 5.42306    |
| X   | ENSG00000101871.2 | "Midline 1 protein (Tripartite motif protein 18) (Putative transcription factor XPRF). [Source:SWISSPROT;Acc:O15344]"                                                                                                                    | same     | 1926    | 8.82493    |
| X   | ENSG00000102207.5 | (blank)                                                                                                                                                                                                                                  | same     | 2298    | 5.24227    |
| X   | ENSG00000102290.5 | "protocadherin 11 X-linked isoform b precursor; protocadherin X; protocadherin-S. [Source:RefSeq;Acc:NM_032967]"                                                                                                                         | opposite | 2913    | 3.04468    |
| X   |                   |                                                                                                                                                                                                                                          |          | 2914    | 13.1611    |
| X   |                   |                                                                                                                                                                                                                                          |          | 2916    | 11.9347    |

| Chr | Ensembl id        | Description                                                                                                                                                                                                  | Strand   | HERV id | HERV score |
|-----|-------------------|--------------------------------------------------------------------------------------------------------------------------------------------------------------------------------------------------------------|----------|---------|------------|
| X   | ENSG00000102383.4 | "Zinc finger DHHC domain containing protein 15. [Source:SWISSPROT;Acc:Q96MV8]"                                                                                                                               | same     | 2516    | 3.01119    |
| X   |                   |                                                                                                                                                                                                              | opposite | 637     | 3.61227    |
| X   |                   |                                                                                                                                                                                                              |          | 638     | 6.14862    |
| X   | ENSG00000120498.4 | "testis expressed sequence 11. [Source:RefSeq;Acc:NM_031276]"                                                                                                                                                | opposite | 594     | 1.08609    |
| X   | ENSG00000126733.5 | "dachshund 2. [Source:RefSeq;Acc:NM_053281]"                                                                                                                                                                 | same     | 841     | 7.13371    |
| X   |                   |                                                                                                                                                                                                              | opposite | 2713    | 7.66591    |
| X   |                   |                                                                                                                                                                                                              |          | 2715    | 6.04782    |
| X   |                   |                                                                                                                                                                                                              |          | 2718    | 3.77357    |
| X   | ENSG00000132438.5 | "Dystrophin. [Source:SWISSPROT;Acc:P11532]"                                                                                                                                                                  | opposite | 283     | 10.2764    |
| X   | ENSG00000133124.5 | "insulin receptor substrate 4. [Source:RefSeq;Acc:NM_003604]"                                                                                                                                                | same     | 3153    | 6.89557    |
| X   |                   |                                                                                                                                                                                                              | opposite | 1265    | 8.30485    |
| X   | ENSG00000146950.2 | "Apical-like protein (APXL protein). [Source:SWISSPROT;Acc:Q13796]"                                                                                                                                          | opposite | 1925    | 6.05979    |
| X   | ENSG00000147044.5 | "Peripheral plasma membrane protein CASK (EC 2.7.1.-) (hCASK) (Calcium/calmodulin-dependent serine protein kinase) (Lin-2 homolog). [Source:SWISSPROT;Acc:O14936]"                                           | opposite | 375     | 7.51318    |
| X   |                   |                                                                                                                                                                                                              |          | 376     | 2.0577     |
| X   | ENSG00000147050.3 | "Ubiquitously transcribed X chromosome tetratricopeptide repeat protein (Ubiquitously transcribed TPR protein on the X chromosome). [Source:SWISSPROT;Acc:O15550]"                                           | opposite | 2202    | 6.02879    |
| X   | ENSG00000147082.4 | "cyclin B3 isoform 1. [Source:RefSeq;Acc:NM_033670]"                                                                                                                                                         | opposite | 2248    | 28.3141    |
| X   | ENSG00000147117.3 | "Zinc finger protein 157 (HZF22). [Source:SWISSPROT;Acc:P51786]"                                                                                                                                             | same     | 407     | 4.17495    |
| X   |                   |                                                                                                                                                                                                              | opposite | 2225    | 9.07868    |
| X   |                   |                                                                                                                                                                                                              |          | 2231    | 6.06989    |
| X   |                   |                                                                                                                                                                                                              |          | 2232    | 1.86465    |
| X   |                   |                                                                                                                                                                                                              |          | 2233    | 5.24723    |
| X   | ENSG00000147246.1 | "5-hydroxytryptamine 2C receptor (5-HT-2C) (Serotonin receptor) (5HT-1C). [Source:SWISSPROT;Acc:P28335]"                                                                                                     | opposite | 3203    | 12.4367    |
| X   | ENSG00000156920.2 | "G-protein coupled receptor 112. [Source:RefSeq;Acc:NM_153834]"                                                                                                                                              | opposite | 3431    | 3.43992    |
| X   | ENSG00000157502.5 | (blank)                                                                                                                                                                                                      | opposite | 3123    | 8.62633    |
| X   | ENSG00000157562.5 | "Collagen alpha 5(IV) chain precursor. [Source:SWISSPROT;Acc:P29400]"                                                                                                                                        | same     | 1265    | 8.30485    |
| X   |                   |                                                                                                                                                                                                              | opposite | 3153    | 6.89557    |
| X   | ENSG00000157625.3 | "TAK1-binding protein 3 isoform 1; NFkB activating protein 1. [Source:RefSeq;Acc:NM_152787]"                                                                                                                 | same     | 2068    | 3.44309    |
| X   | ENSG00000158311.1 | (blank)                                                                                                                                                                                                      | opposite | 3082    | 5.95367    |
| X   | ENSG00000158813.3 | "Ectodysplasin A (Ectodermal dysplasia protein) (EDA protein). [Source:SWISSPROT;Acc:Q92838]"                                                                                                                | opposite | 2456    | 12.3885    |
| X   |                   |                                                                                                                                                                                                              |          | 2462    | 5.76595    |
| X   | ENSG00000165509.2 | "Melanoma-associated antigen C3 (MAGE-C3 antigen) (Hepatocellular carcinoma-associated antigen 2). [Source:SWISSPROT;Acc:Q8TD91]"                                                                            | same     | 1596    | 5.99934    |
| X   |                   |                                                                                                                                                                                                              | opposite | 3485    | 9.87526    |
| X   | ENSG00000165591.2 | (blank)                                                                                                                                                                                                      | opposite | 2340    | 18.4101    |
| X   |                   |                                                                                                                                                                                                              |          | 2341    | 5.70138    |
| X   | ENSG00000166389.3 | (blank)                                                                                                                                                                                                      | same     | 1214    | 3.88217    |
| X   |                   |                                                                                                                                                                                                              | opposite | 3073    | 2.11847    |
| X   | ENSG00000169093.3 | "N-acetylserotonin O-methyltransferase-like protein (ASMTL). [Source:SWISSPROT;Acc:O95671]"                                                                                                                  | opposite | 55      | 3.43196    |
| X   | ENSG00000169306.2 | "X-linked interleukin-1 receptor accessory protein-like 1 precursor (IL1RAPL-1) (Oligophrenin-4) (Three immunoglobulin domain-containing IL-1 receptor-related 2) (TIGIRR-2). [Source:SWISSPROT;Acc:Q9NZN1]" | opposite | 2056    | 16.4133    |
| X   | ENSG00000171478.1 | DJ54B20.3 (Novel protein similar to lysozyme C (1                                                                                                                                                            | same     | 414     | 2.19003    |
| X   | ENSG00000173971.2 | (blank)                                                                                                                                                                                                      | opposite | 3432    | 5.80481    |

| Chr | Ensembl id        | Description                                                                                                                                                                                                                                                     | Strand   | HERV id | HERV score |
|-----|-------------------|-----------------------------------------------------------------------------------------------------------------------------------------------------------------------------------------------------------------------------------------------------------------|----------|---------|------------|
| X   | ENSG00000174016.2 | (blank)                                                                                                                                                                                                                                                         | opposite | 2579    | 7.54324    |
| X   | ENSG00000183035.1 | "Cylicin I (Multiple-band polypeptide I) (Fragment). [Source:SWISSPROT;Acc:P35663]"                                                                                                                                                                             | opposite | 2673    | 4.85149    |
| X   | ENSG00000184368.3 | (blank)                                                                                                                                                                                                                                                         | opposite | 175     | 5.73738    |
| X   | ENSG00000185010.1 | "coagulation factor VIII isoform b precursor; coagulation factor VIIIc; procoagulant component; Factor VIII F8B. [Source:RefSeq;Acc:NM_019863]"                                                                                                                 | opposite | 1747    | 3.82785    |
| X   | ENSG00000186376.3 | "Zinc finger protein 75. [Source:SWISSPROT;Acc:P51815]"                                                                                                                                                                                                         | opposite | 1539    | 5.59539    |
| X   | ENSG00000189108.1 | X-linked interleukin-1 receptor accessory protein-like 2 precursor (IL1RAPL-2 related protein) (Interleukin-1 receptor 9) (IL-1R9) (IL-1 receptor accessory protein-like 2) (Three immunoglobulin domain- containing IL-1 receptor-related 1) (TIGIRR-1). [Sour | same     | 1236    | 3.8766     |
| X   |                   |                                                                                                                                                                                                                                                                 |          | 1237    | 10.7855    |
| X   |                   |                                                                                                                                                                                                                                                                 |          | 1238    | 13.3859    |
| X   |                   |                                                                                                                                                                                                                                                                 | opposite | 3104    | 3.23388    |
| X   |                   |                                                                                                                                                                                                                                                                 |          | 3118    | 8.84552    |
| Y   | ENSG00000092377.3 | Transducin beta-like 1Y protein (Transducin-beta-like 1                                                                                                                                                                                                         | same     | 3806    | 5.82141    |
| Y   |                   |                                                                                                                                                                                                                                                                 | opposite | 4424    | 17.0534    |
| Y   |                   |                                                                                                                                                                                                                                                                 |          | 4426    | 7.05606    |
| Y   | ENSG00000099715.5 | "protocadherin 11 Y-linked isoform a; protocadherin Y; protocadherin 22. [Source:RefSeq;Acc:NM_032971]"                                                                                                                                                         | opposite | 4376    | 3.04068    |
| Y   |                   |                                                                                                                                                                                                                                                                 |          | 4377    | 12.6966    |
| Y   | ENSG00000114374.3 | Probable ubiquitin carboxyl-terminal hydrolase FAF-Y (EC 3.1.2.15) (Ubiquitin thiolesterase FAF-Y) (Ubiquitin-specific processing protease FAF-Y) (Deubiquitinating enzyme FAF-Y) (Fat facets protein related                                                   | opposite | 4533    | 4.73427    |
| Y   | ENSG00000131003.5 | RNA binding motif protein                                                                                                                                                                                                                                       | same     | 4167    | 1.99414    |
| Y   | ENSG00000169953.3 | Heat shock transcription factor                                                                                                                                                                                                                                 | opposite | 4059    | 16.187     |
| Y   |                   |                                                                                                                                                                                                                                                                 |          | 4060    | 14.4185    |
| Y   | ENSG00000172468.3 | Heat shock transcription factor                                                                                                                                                                                                                                 | opposite | 4659    | 13.2314    |
| Y   |                   |                                                                                                                                                                                                                                                                 |          | 4660    | 16.123     |
| Y   | ENSG00000180910.4 | "Transcript Y 11 protein. [Source:SWISSPROT;Acc:Q9BZ99]"                                                                                                                                                                                                        | same     | 4470    | 6.33369    |
| Y   |                   |                                                                                                                                                                                                                                                                 |          | 4471    | 9.74092    |
| Y   |                   |                                                                                                                                                                                                                                                                 |          | 4472    | 3.17832    |
| Y   |                   |                                                                                                                                                                                                                                                                 |          | 4474    | 4.91826    |
| Y   |                   |                                                                                                                                                                                                                                                                 |          | 4476    | 3.51396    |
| Y   |                   |                                                                                                                                                                                                                                                                 |          | 4477    | 12.6566    |
| Y   |                   |                                                                                                                                                                                                                                                                 |          | 4479    | 13.6137    |
| Y   |                   |                                                                                                                                                                                                                                                                 |          | 4480    | 20.8664    |
| Y   |                   |                                                                                                                                                                                                                                                                 | opposite | 3835    | 23.9626    |
| Y   |                   |                                                                                                                                                                                                                                                                 |          | 3836    | 7.33468    |
| Y   |                   |                                                                                                                                                                                                                                                                 |          | 3838    | 16.7162    |
| Y   |                   |                                                                                                                                                                                                                                                                 |          | 3839    | 29.4245    |
| Y   |                   |                                                                                                                                                                                                                                                                 |          | 3843    | 18.2014    |
| Y   |                   |                                                                                                                                                                                                                                                                 |          | 3844    | 12.7059    |
| Y   |                   |                                                                                                                                                                                                                                                                 |          | 3845    | 8.78368    |
| Y   |                   |                                                                                                                                                                                                                                                                 |          | 3846    | 4.92463    |
| Y   |                   |                                                                                                                                                                                                                                                                 |          | 3851    | 4.97209    |
| Y   |                   |                                                                                                                                                                                                                                                                 |          | 3853    | 4.89907    |
| Y   |                   |                                                                                                                                                                                                                                                                 |          | 3854    | 10.9767    |
| Y   | ENSG00000183878.3 | "Ubiquitously transcribed Y chromosome tetratricopeptide repeat protein (Ubiquitously transcribed TPR protein on the Y chromosome).                                                                                                                             | opposite | 3906    | 19.1938    |

| Chr | Ensembl id | Description                    | Strand | HERV id | HERV score |
|-----|------------|--------------------------------|--------|---------|------------|
|     |            | [Source:SWISSPROT;Acc:O14607]" |        |         |            |
| Y   |            |                                |        | 3908    | 6.70549    |
| Y   |            |                                |        | 3909    | 8.3788     |
| Y   |            |                                |        | 3914    | 18.7425    |
| Y   |            |                                |        | 3915    | 15.95      |
