# Supplementary material for: Identification of endogenous retroviral reading frames in the human genome
Source: PubMed Central journal article supplement (PMC524368; doi:10.1186/1742-4690-1-32), 2004-10-11
Supplement: 1742-4690-1-32-S2.pdf [file 1742-4690-1-32-S2.pdf]

## Additional File 2

Table 2. ESTs matching HERVs containing a long viral ORF.

ESTs were compared to HERVs using megablast. Only ESTs that best matched the target HERV were kept. Finally, ESTs mapping conclusively to the same genomic regions as the target HERV were kept. EST library information (Organ and Tissue) were parsed from Genbank. The positions are in NCBI35 coordinates due to overly stringent settings of EST mappings in the NCBI34 mapping at UCSC. HERV positions were lifted to NCBI35 coordinates using the “lift genome annotations” tool at <http://genome.ucsc.edu>.

| ESTid    | HERV id | Organ         | Tissue                              | HERV position            | EST position             |
|----------|---------|---------------|-------------------------------------|--------------------------|--------------------------|
| AI379210 | 3143    | 0             | B-cell_chronic_lymphocytic_leukemia | chrX:105067535-105070015 | chrX:106101476-106101909 |
| AI570707 | 3143    | brain         | anaplastic_oligodendroglioma        | chrX:105067535-105070015 | chrX:106101499-106101924 |
| AI598135 | 3143    | brain         | anaplastic_oligodendroglioma        | chrX:105067535-105070015 | chrX:106101499-106101989 |
| AW812038 | 5201    | stomach       | 0                                   | chr1:75266332-75270814   | chr1:75558716-75559243   |
| BI062752 | 5201    | uterus_tumor  | 0                                   | chr1:75266332-75270814   | chr1:75559344-75559458   |
| BQ304053 | 5201    | breast        | 0                                   | chr1:75266332-75270814   | chr1:75559909-75560340   |
| AI352469 | 7261    | 0             | pooled_germ_cell_tumors             | chr1:152814156-152821460 | chr1:152410866-152411356 |
| AI818326 | 7261    | pancreas      | adenocarcinoma                      | chr1:152814156-152821460 | chr1:152412558-152413216 |
| AL704166 | 7261    | 0             | 0                                   | chr1:152814156-152821460 | chr1:152413728-152414443 |
| AU123401 | 7261    | 0             | 0                                   | chr1:152814156-152821460 | chr1:152409880-152410525 |
| AW814393 | 7261    | stomach       | 0                                   | chr1:152814156-152821460 | chr1:152410455-152410939 |
| BE061583 | 7261    | breast        | 0                                   | chr1:152814156-152821460 | chr1:152411168-152411625 |
| BE061602 | 7261    | breast        | 0                                   | chr1:152814156-152821460 | chr1:152411122-152411555 |
| BE061603 | 7261    | breast        | 0                                   | chr1:152814156-152821460 | chr1:152410538-152411053 |
| BE061604 | 7261    | breast        | 0                                   | chr1:152814156-152821460 | chr1:152411111-152411555 |
| BG433950 | 7261    | kidney        | 0                                   | chr1:152814156-152821460 | chr1:152411346-152412156 |
| BG501905 | 7261    | testis        | embryonal_carcinoma                 | chr1:152814156-152821460 | chr1:152409770-152420468 |
| BG501920 | 7261    | testis        | embryonal_carcinoma                 | chr1:152814156-152821460 | chr1:152410129-152420468 |
| BM910699 | 7261    | brain         | astrocytoma_grade_IV_cell_line      | chr1:152814156-152821460 | chr1:152410232-152431394 |
| BQ291855 | 7261    | amnion_normal | 0                                   | chr1:152814156-152821460 | chr1:152410390-152420340 |

|          |       |                  |                                                        |   |                          |                          |
|----------|-------|------------------|--------------------------------------------------------|---|--------------------------|--------------------------|
| BQ681015 | 7261  | skin             | melanotic_melanoma_cell_line                           |   | chr1:152814156-152821460 | chr1:152410607-152410977 |
| BX481216 | 7261  |                  |                                                        | 0 | chr1:152814156-152821460 | chr1:152414078-152414677 |
| BX483767 | 7261  |                  |                                                        | 0 | chr1:152814156-152821460 | chr1:152411187-152411803 |
| BX952321 | 7261  |                  |                                                        | 0 | chr1:152814156-152821460 | chr1:152413022-152413638 |
| BX955229 | 7261  |                  |                                                        | 0 | chr1:152814156-152821460 | chr1:152412987-152413575 |
| BX955997 | 7261  |                  |                                                        | 0 | chr1:152814156-152821460 | chr1:152413756-152414438 |
| CB986115 | 7261  | Pooled-Glandular |                                                        | 0 | chr1:152814156-152821460 | chr1:152410146-152420428 |
| CD104832 | 7261  | Pooled-Skin      |                                                        | 0 | chr1:152814156-152821460 | chr1:152410277-152431408 |
| CD518953 | 7261  |                  | White_Matter                                           | 0 | chr1:152814156-152821460 | chr1:152409941-152431387 |
| T05808   | 7261  |                  |                                                        | 0 | chr1:152814156-152821460 | chr1:152411196-152411539 |
| AI536854 | 12121 | uterus           | moderately-differentiated_endometrial_adenocarcinoma_3 |   | chr3:102732607-102739837 | chr3:102893882-102894312 |
| AI669530 | 12121 | prostate         |                                                        | 0 | chr3:102732607-102739837 | chr3:102894229-102894312 |
| AL535594 | 12121 | brain            | FETAL_BRAIN                                            |   | chr3:102732607-102739837 | chr3:102898765-102899674 |
| AL698108 | 12121 |                  |                                                        | 0 | chr3:102732607-102739837 | chr3:102896227-102897120 |
| AU119631 | 12121 |                  | whole_embryo_mainly_head                               | 0 | chr3:102732607-102739837 | chr3:102895664-102896492 |
| AV727670 | 12121 |                  | Hypothalamus                                           | 0 | chr3:102732607-102739837 | chr3:102900070-102900693 |
| AW614963 | 12121 | lung             | carcinoid                                              |   | chr3:102732607-102739837 | chr3:102898605-102898851 |
| BE217830 | 12121 | lung             | carcinoid                                              |   | chr3:102732607-102739837 | chr3:102898356-102898851 |
| BF767553 | 12121 | colon_normal     |                                                        | 0 | chr3:102732607-102739837 | chr3:102899853-102900119 |
| BF887722 | 12121 | testis_normal    |                                                        | 0 | chr3:102732607-102739837 | chr3:102899990-102900745 |
| BI004756 | 12121 | head_normal      |                                                        | 0 | chr3:102732607-102739837 | chr3:102898565-102899006 |
| BM310825 | 12121 | Pancreas         | Purified_pancreatic_islet                              |   | chr3:102732607-102739837 | chr3:102895860-102896500 |
| BM310867 | 12121 | Pancreas         | Purified_pancreatic_islet                              |   | chr3:102732607-102739837 | chr3:102896161-102896755 |
| BQ342232 | 12121 | nervous_normal   |                                                        | 0 | chr3:102732607-102739837 | chr3:102898791-102898932 |
| BU853400 | 12121 | testis           |                                                        | 0 | chr3:102732607-102739837 | chr3:102900585-102901319 |
| BX451254 | 12121 | brain            | FETAL_BRAIN                                            |   | chr3:102732607-102739837 | chr3:102899493-102899749 |
| BX470668 | 12121 |                  |                                                        | 0 | chr3:102732607-102739837 | chr3:102894726-102895354 |
| BX481275 | 12121 |                  |                                                        | 0 | chr3:102732607-102739837 | chr3:102894696-102895243 |
| BX491192 | 12121 |                  |                                                        | 0 | chr3:102732607-102739837 | chr3:102894803-102895413 |
| CF143144 | 12121 |                  | lymph                                                  | 0 | chr3:102732607-102739837 | chr3:102895070-102895724 |

|          |       |                   |   |                                                 |                          |                          |
|----------|-------|-------------------|---|-------------------------------------------------|--------------------------|--------------------------|
| CF227259 | 12121 |                   | 0 | embryonic_stem_cells,_cell_lines_H1,_H7,_and_H9 | chr3:102732607-102739837 | chr3:102899498-102900173 |
| CN279095 | 12121 |                   | 0 | embryonic_stem_cells,_cell_lines_H1,_H7,_and_H9 | chr3:102732607-102739837 | chr3:102895722-102896365 |
| H92683   | 12121 | pineal_gland      |   |                                                 | chr3:102732607-102739837 | chr3:102898173-102898519 |
| BU196456 | 14677 | skin              |   | melanotic_melanoma,_cell_line                   | chr3:186602171-186609460 | chr3:186763126-186763288 |
| AI633818 | 22748 |                   | 0 | pooled_germ_cell_tumors                         | chr5:156066524-156073823 | chr5:156021839-156022427 |
| AI636743 | 22748 |                   | 0 | pooled_germ_cell_tumors                         | chr5:156066524-156073823 | chr5:156021839-156022452 |
| BQ360868 | 22748 | ovary             |   |                                                 | chr5:156066524-156073823 | chr5:156019851-156020177 |
| CF227253 | 22748 |                   | 0 | embryonic_stem_cells,_cell_lines_H1,_H7,_and_H9 | chr5:156066524-156073823 | chr5:156019794-156020416 |
| CN345079 | 22748 |                   | 0 | embryonic_stem_cells,_cell_lines_H1,_H7,_and_H9 | chr5:156066524-156073823 | chr5:156024956-156025642 |
| BG004978 | 24232 | placenta_normal   |   |                                                 | chr6:11211667-11219905   | chr6:11211552-11212112   |
| BG011064 | 24232 | placenta_normal   |   |                                                 | chr6:11211667-11219905   | chr6:11212146-11212501   |
| BQ011017 | 24232 | Placenta          |   | Placenta                                        | chr6:11211667-11219905   | chr6:11212683-11213130   |
| BX326241 | 24232 |                   | 0 | PLACENTA_COT_25-NORMALIZED                      | chr6:11211667-11219905   | chr6:11212303-11213141   |
| BX327880 | 24232 |                   | 0 | PLACENTA_COT_25-NORMALIZED                      | chr6:11211667-11219905   | chr6:11212604-11213519   |
| BX334611 | 24232 |                   | 0 | PLACENTA_COT_25-NORMALIZED                      | chr6:11211667-11219905   | chr6:11212957-11213850   |
| BX365962 | 24232 |                   | 0 | PLACENTA_COT_25-NORMALIZED                      | chr6:11211667-11219905   | chr6:11213221-11213850   |
| BX367795 | 24232 |                   | 0 | PLACENTA_COT_25-NORMALIZED                      | chr6:11211667-11219905   | chr6:11212383-11213247   |
| BX371758 | 24232 |                   | 0 | PLACENTA_COT_25-NORMALIZED                      | chr6:11211667-11219905   | chr6:11211474-11212328   |
| BX387071 | 24232 |                   | 0 | PLACENTA_COT_25-NORMALIZED                      | chr6:11211667-11219905   | chr6:11212122-11213024   |
| BX395188 | 24232 |                   | 0 | NEUROBLASTOMA_COT_50-NORMALIZED                 | chr6:11211667-11219905   | chr6:11211346-11220034   |
| CB990542 | 24232 | placenta          |   | Human_Placenta                                  | chr6:11211667-11219905   | chr6:11213158-11219948   |
| CF529929 | 24232 | Placenta          |   | Placenta                                        | chr6:11211667-11219905   | chr6:11212683-11213106   |
| CF995131 | 24232 | placenta          |   | Human_Placenta                                  | chr6:11211667-11219905   | chr6:11213357-11219948   |
| T95945   | 24232 | Liver_and_Spleen  |   |                                                 | chr6:11211667-11219905   | chr6:11212141-11212320   |
| W33061   | 24232 | parathyroid_gland |   | parathyroid_tumor                               | chr6:11211667-11219905   | chr6:11211583-11219941   |
| AI970376 | 26658 |                   | 0 | pooled_germ_cell_tumors                         | chr7:4367317-4374898     | chr7:4400188-4400573     |
| BQ899216 | 26658 | skin              |   | melanotic_melanoma,_cell_line                   | chr7:4367317-4374898     | chr7:4396094-4396938     |
| BU157610 | 26658 | skin              |   | melanotic_melanoma,_cell_line                   | chr7:4367317-4374898     | chr7:4404752-4412455     |

|          |       |                   |                                                           |                        |                        |
|----------|-------|-------------------|-----------------------------------------------------------|------------------------|------------------------|
| BU157610 | 26659 | skin              | melanotic melanoma, cell line                             | chr7:4375821-4383401   | chr7:4404752-4412455   |
| AA027781 | 27110 | 0                 | placenta                                                  | chr7:63862984-63871411 | chr7:63895957-63896388 |
| AI032838 | 27110 | Liver_and_Spleen  | 0                                                         | chr7:63862984-63871411 | chr7:63896392-63896699 |
| AV702610 | 27110 | 0                 | Adrenal_gland                                             | chr7:63862984-63871411 | chr7:63895302-63896048 |
| AV705656 | 27110 | 0                 | Adrenal_gland                                             | chr7:63862984-63871411 | chr7:63895418-63896001 |
| AV706536 | 27110 | 0                 | Adrenal_gland                                             | chr7:63862984-63871411 | chr7:63895295-63895995 |
| AW194552 | 27110 | kidney            | 2_pooled_Wilms'_tumors,_one_primary_and_one_metastatic_to | chr7:63862984-63871411 | chr7:63896167-63896300 |
| AW955895 | 27110 | 0                 | 0                                                         | chr7:63862984-63871411 | chr7:63895421-63895847 |
| BE222728 | 27110 | brain             | oligodendroglioma                                         | chr7:63862984-63871411 | chr7:63896157-63896723 |
| BF882678 | 27110 | lung_tumor        | 0                                                         | chr7:63862984-63871411 | chr7:63897393-63897869 |
| BG698660 | 27110 | skin              | 0                                                         | chr7:63862984-63871411 | chr7:63895007-63895829 |
| BG741949 | 27110 | skin              | 0                                                         | chr7:63862984-63871411 | chr7:63895430-63896266 |
| BM354183 | 27110 | Pancreas          | Islets_of_Langerhans                                      | chr7:63862984-63871411 | chr7:63897543-63911202 |
| BX361372 | 27110 | 0                 | PLACENTA_COT_25-NORMALIZED                                | chr7:63862984-63871411 | chr7:63897411-63911190 |
| BX389809 | 27110 | 0                 | PLACENTA_COT_25-NORMALIZED                                | chr7:63862984-63871411 | chr7:63896664-63897525 |
| CF994104 | 27110 | placenta          | Human_Placenta                                            | chr7:63862984-63871411 | chr7:63897413-63911224 |
| CF994831 | 27110 | placenta          | Human_Placenta                                            | chr7:63862984-63871411 | chr7:63897478-63903969 |
| R85001   | 27110 | brain             | 0                                                         | chr7:63862984-63871411 | chr7:63895951-63896097 |
| AA426511 | 27286 | mixed_(see_below) | Pooled_human_melanocyte,_fetal_heart,_and_pregnant_uterus | chr7:91710047-91718755 | chr7:91742411-91742908 |
| AA776439 | 27286 | Liver_and_Spleen  | 0                                                         | chr7:91710047-91718755 | chr7:91743098-91743525 |
| AA781423 | 27286 | 0                 | 0                                                         | chr7:91710047-91718755 | chr7:91742344-91742833 |
| AI128496 | 27286 | placenta          | 0                                                         | chr7:91710047-91718755 | chr7:91742345-91742761 |
| AI128526 | 27286 | placenta          | 0                                                         | chr7:91710047-91718755 | chr7:91742344-91742758 |
| AU138097 | 27286 | 0                 | placenta                                                  | chr7:91710047-91718755 | chr7:91743017-91743714 |
| AU138405 | 27286 | 0                 | placenta                                                  | chr7:91710047-91718755 | chr7:91743065-91743783 |
| BE019603 | 27286 | placenta          | choriocarcinoma                                           | chr7:91710047-91718755 | chr7:91743058-91743644 |
| BE732673 | 27286 | placenta          | choriocarcinoma                                           | chr7:91710047-91718755 | chr7:91742345-91742785 |
| BE734284 | 27286 | placenta          | choriocarcinoma                                           | chr7:91710047-91718755 | chr7:91742906-91743624 |
| BF990707 | 27286 | placenta_normal   | 0                                                         | chr7:91710047-91718755 | chr7:91742990-91743340 |
| BF990710 | 27286 | placenta_normal   | 0                                                         | chr7:91710047-91718755 | chr7:91743092-91743350 |
| BF990902 | 27286 | placenta_normal   | 0                                                         | chr7:91710047-91718755 | chr7:91742990-91743307 |

|          |       |                 |   |                        |                        |
|----------|-------|-----------------|---|------------------------|------------------------|
| BF997514 | 27286 | placenta_normal | 0 | chr7:91710047-91718755 | chr7:91742718-91751486 |
| BG000981 | 27286 | placenta_normal | 0 | chr7:91710047-91718755 | chr7:91744348-91744851 |
| BG004247 | 27286 | placenta_normal | 0 | chr7:91710047-91718755 | chr7:91743051-91743350 |
| BG004254 | 27286 | placenta_normal | 0 | chr7:91710047-91718755 | chr7:91742950-91743342 |
| BG572445 | 27286 | placenta        | 0 | chr7:91710047-91718755 | chr7:91742866-91743605 |
| BG984671 | 27286 | colon_normal    | 0 | chr7:91710047-91718755 | chr7:91743703-91743797 |
| BI052559 | 27286 | placenta_normal | 0 | chr7:91710047-91718755 | chr7:91743556-91743929 |
| BI052561 | 27286 | placenta_normal | 0 | chr7:91710047-91718755 | chr7:91743556-91743929 |
| BI052566 | 27286 | placenta_normal | 0 | chr7:91710047-91718755 | chr7:91743556-91743924 |
| BI052567 | 27286 | placenta_normal | 0 | chr7:91710047-91718755 | chr7:91743556-91743929 |
| BI052569 | 27286 | placenta_normal | 0 | chr7:91710047-91718755 | chr7:91743556-91743936 |
| BI052570 | 27286 | placenta_normal | 0 | chr7:91710047-91718755 | chr7:91743556-91743929 |
| BI052571 | 27286 | placenta_normal | 0 | chr7:91710047-91718755 | chr7:91743556-91743929 |
| BI052572 | 27286 | placenta_normal | 0 | chr7:91710047-91718755 | chr7:91743556-91743929 |
| BI053219 | 27286 | placenta_normal | 0 | chr7:91710047-91718755 | chr7:91742873-91743159 |
| BI053220 | 27286 | placenta_normal | 0 | chr7:91710047-91718755 | chr7:91742846-91743159 |
| BI053385 | 27286 | placenta_normal | 0 | chr7:91710047-91718755 | chr7:91743556-91743888 |
| BI053386 | 27286 | placenta_normal | 0 | chr7:91710047-91718755 | chr7:91743551-91743884 |
| BI055456 | 27286 | placenta_normal | 0 | chr7:91710047-91718755 | chr7:91743556-91743856 |
| BI055458 | 27286 | placenta_normal | 0 | chr7:91710047-91718755 | chr7:91743551-91743863 |
| BI055459 | 27286 | placenta_normal | 0 | chr7:91710047-91718755 | chr7:91743554-91743859 |
| BI056077 | 27286 | placenta_normal | 0 | chr7:91710047-91718755 | chr7:91743556-91743856 |
| BI056079 | 27286 | placenta_normal | 0 | chr7:91710047-91718755 | chr7:91743551-91743863 |
| BI056080 | 27286 | placenta_normal | 0 | chr7:91710047-91718755 | chr7:91743554-91743859 |
| BI056589 | 27286 | placenta_normal | 0 | chr7:91710047-91718755 | chr7:91743556-91743929 |
| BI056590 | 27286 | placenta_normal | 0 | chr7:91710047-91718755 | chr7:91743654-91743930 |
| BI056592 | 27286 | placenta_normal | 0 | chr7:91710047-91718755 | chr7:91743554-91743898 |
| BI056593 | 27286 | placenta_normal | 0 | chr7:91710047-91718755 | chr7:91743556-91743930 |
| BI056595 | 27286 | placenta_normal | 0 | chr7:91710047-91718755 | chr7:91743554-91743929 |
| BI056596 | 27286 | placenta_normal | 0 | chr7:91710047-91718755 | chr7:91743556-91743871 |
| BI059387 | 27286 | placenta_normal | 0 | chr7:91710047-91718755 | chr7:91743703-91743797 |
| BI087886 | 27286 | cervix          | 0 | chr7:91710047-91718755 | chr7:91742344-91743101 |

|          |       |                 |          |                            |                        |                        |
|----------|-------|-----------------|----------|----------------------------|------------------------|------------------------|
| BQ022458 | 27286 | Placenta        | Placenta |                            | chr7:91710047-91718755 | chr7:91744333-91744566 |
| BQ024998 | 27286 | Placenta        | Placenta |                            | chr7:91710047-91718755 | chr7:91742344-91744593 |
| BQ365139 | 27286 | placenta_normal |          | 0                          | chr7:91710047-91718755 | chr7:91742990-91743338 |
| BQ365143 | 27286 | placenta_normal |          | 0                          | chr7:91710047-91718755 | chr7:91743013-91743342 |
| BQ365206 | 27286 | placenta_normal |          | 0                          | chr7:91710047-91718755 | chr7:91743043-91743342 |
| BQ365207 | 27286 | placenta_normal |          | 0                          | chr7:91710047-91718755 | chr7:91742839-91743319 |
| BQ365241 | 27286 | placenta_normal |          | 0                          | chr7:91710047-91718755 | chr7:91742849-91743078 |
| BQ365242 | 27286 | placenta_normal |          | 0                          | chr7:91710047-91718755 | chr7:91742849-91743077 |
| BQ365279 | 27286 | placenta_normal |          | 0                          | chr7:91710047-91718755 | chr7:91742775-91751468 |
| BQ366047 | 27286 | placenta_normal |          | 0                          | chr7:91710047-91718755 | chr7:91743686-91743791 |
| BQ368374 | 27286 | placenta_normal |          | 0                          | chr7:91710047-91718755 | chr7:91743302-91743411 |
| BX326300 | 27286 |                 | 0        | PLACENTA_COT_25-NORMALIZED | chr7:91710047-91718755 | chr7:91743814-91744556 |
| BX326647 | 27286 |                 | 0        | PLACENTA_COT_25-NORMALIZED | chr7:91710047-91718755 | chr7:91743194-91744069 |
| BX337769 | 27286 |                 | 0        | PLACENTA_COT_25-NORMALIZED | chr7:91710047-91718755 | chr7:91742375-91743368 |
| BX337770 | 27286 |                 | 0        | PLACENTA_COT_25-NORMALIZED | chr7:91710047-91718755 | chr7:91743930-91751648 |
| BX347111 | 27286 |                 | 0        | PLACENTA_COT_25-NORMALIZED | chr7:91710047-91718755 | chr7:91743007-91743851 |
| BX347314 | 27286 |                 | 0        | PLACENTA_COT_25-NORMALIZED | chr7:91710047-91718755 | chr7:91743531-91744459 |
| BX347619 | 27286 |                 | 0        | PLACENTA_COT_25-NORMALIZED | chr7:91710047-91718755 | chr7:91742969-91743836 |
| BX347952 | 27286 |                 | 0        | PLACENTA_COT_25-NORMALIZED | chr7:91710047-91718755 | chr7:91743172-91744121 |
| BX357208 | 27286 |                 | 0        | PLACENTA_COT_25-NORMALIZED | chr7:91710047-91718755 | chr7:91742373-91743133 |
| BX365066 | 27286 |                 | 0        | PLACENTA_COT_25-NORMALIZED | chr7:91710047-91718755 | chr7:91742392-91743403 |
| BX367907 | 27286 |                 | 0        | PLACENTA_COT_25-NORMALIZED | chr7:91710047-91718755 | chr7:91743413-91744238 |
| BX368078 | 27286 |                 | 0        | PLACENTA_COT_25-NORMALIZED | chr7:91710047-91718755 | chr7:91742836-91743879 |
| BX378303 | 27286 |                 | 0        | PLACENTA_COT_25-NORMALIZED | chr7:91710047-91718755 | chr7:91742414-91743394 |
| BX380176 | 27286 |                 | 0        | PLACENTA_COT_25-NORMALIZED | chr7:91710047-91718755 | chr7:91742380-91743347 |
| BX388766 | 27286 |                 | 0        | PLACENTA_COT_25-NORMALIZED | chr7:91710047-91718755 | chr7:91742959-91743783 |
| BX388917 | 27286 |                 | 0        | PLACENTA_COT_25-NORMALIZED | chr7:91710047-91718755 | chr7:91742974-91743440 |
| BX388918 | 27286 |                 | 0        | PLACENTA_COT_25-NORMALIZED | chr7:91710047-91718755 | chr7:91742969-91743372 |
| BX388919 | 27286 |                 | 0        | PLACENTA_COT_25-NORMALIZED | chr7:91710047-91718755 | chr7:91742970-91743238 |
| BX389656 | 27286 |                 | 0        | PLACENTA_COT_25-NORMALIZED | chr7:91710047-91718755 | chr7:91743159-91744081 |
| BX389657 | 27286 |                 | 0        | PLACENTA_COT_25-NORMALIZED | chr7:91710047-91718755 | chr7:91743140-91744081 |
| BX391741 | 27286 |                 | 0        | PLACENTA_COT_25-NORMALIZED | chr7:91710047-91718755 | chr7:91743188-91744122 |

|          |       |                  |   |                                                            |                           |                           |
|----------|-------|------------------|---|------------------------------------------------------------|---------------------------|---------------------------|
| BX408733 | 27286 |                  | 0 | PLACENTA                                                   | chr7:91710047-91718755    | chr7:91743436-91744318    |
| BX408734 | 27286 |                  | 0 | PLACENTA                                                   | chr7:91710047-91718755    | chr7:91743513-91744318    |
| BX408752 | 27286 |                  | 0 | PLACENTA                                                   | chr7:91710047-91718755    | chr7:91743487-91744395    |
| BX409035 | 27286 |                  | 0 | PLACENTA                                                   | chr7:91710047-91718755    | chr7:91743184-91743666    |
| BX409328 | 27286 |                  | 0 | PLACENTA                                                   | chr7:91710047-91718755    | chr7:91743486-91744395    |
| BX430050 | 27286 |                  | 0 | PLACENTA                                                   | chr7:91710047-91718755    | chr7:91743185-91743806    |
| BX430055 | 27286 |                  | 0 | PLACENTA                                                   | chr7:91710047-91718755    | chr7:91743157-91743813    |
| BX439636 | 27286 |                  | 0 | PLACENTA                                                   | chr7:91710047-91718755    | chr7:91742425-91743340    |
| CN272394 | 27286 |                  | 0 | embryonic_stem_cell,_retinoic_acid_and_mitogen-treated_hES | chr7:91710047-91718755    | chr7:91742356-91743113    |
| D78692   | 27286 |                  | 0 | placenta                                                   | chr7:91710047-91718755    | chr7:91743860-91744239    |
| H01372   | 27286 | placenta         |   | 0                                                          | chr7:91710047-91718755    | chr7:91742673-91743057    |
| N41878   | 27286 | placenta         |   | 0                                                          | chr7:91710047-91718755    | chr7:91742581-91743000    |
| N53177   | 27286 | Liver_and_Spleen |   | 0                                                          | chr7:91710047-91718755    | chr7:91742344-91742768    |
| N58614   | 27286 | Liver_and_Spleen |   | 0                                                          | chr7:91710047-91718755    | chr7:91742787-91743153    |
| N77302   | 27286 | Liver_and_Spleen |   | 0                                                          | chr7:91710047-91718755    | chr7:91742718-91743149    |
| R27388   | 27286 | placenta         |   | 0                                                          | chr7:91710047-91718755    | chr7:91742729-91743056    |
| R37932   | 27286 | placenta         |   | 0                                                          | chr7:91710047-91718755    | chr7:91743264-91743525    |
| R68740   | 27286 | placenta         |   | 0                                                          | chr7:91710047-91718755    | chr7:91743319-91743734    |
| R76086   | 27286 | placenta         |   | 0                                                          | chr7:91710047-91718755    | chr7:91742361-91742821    |
| R76136   | 27286 | placenta         |   | 0                                                          | chr7:91710047-91718755    | chr7:91742491-91742858    |
| R77278   | 27286 | placenta         |   | 0                                                          | chr7:91710047-91718755    | chr7:91742357-91742846    |
| R78828   | 27286 | placenta         |   | 0                                                          | chr7:91710047-91718755    | chr7:91742641-91743057    |
| T39519   | 27286 | placenta         |   | 0                                                          | chr7:91710047-91718755    | chr7:91743634-91743762    |
| AA584891 | 27728 |                  | 0 | pheochromocytoma                                           | chr7:152498159-152502575  | chr7:152545820-152546208  |
| AA704457 | 33127 | Liver_and_Spleen |   | 0                                                          | chr10:101246096-101252303 | chr10:101577201-101577664 |
| AW818206 | 34052 | stomach          |   | 0                                                          | chr11:101104479-101112064 | chr11:101077996-101078661 |
| CF227263 | 34052 |                  | 0 | embryonic_stem_cells,_cell_lines_H1,_H7,_and_H9            | chr11:101104479-101112064 | chr11:101075795-101076356 |
| CF227264 | 34052 |                  | 0 | embryonic_stem_cells,_cell_lines_H1,_H7,_and_H9            | chr11:101104479-101112064 | chr11:101075795-101076445 |
| CF227266 | 34052 |                  | 0 | embryonic_stem_cells,_DMSO-treated_H9_cell_line            | chr11:101104479-101112064 | chr11:101077858-101078518 |

|          |       |                 |   |                                                 |                           |                           |
|----------|-------|-----------------|---|-------------------------------------------------|---------------------------|---------------------------|
| CF227268 | 34052 |                 | 0 | embryonic_stem_cells,_cell_lines_H1,_H7,_and_H9 | chr11:101104479-101112064 | chr11:101071894-101079622 |
| CF227270 | 34052 |                 | 0 | embryonic_stem_cells,_cell_lines_H1,_H7,_and_H9 | chr11:101104479-101112064 | chr11:101071930-101077833 |
| AI480345 | 34720 | kidney          |   |                                                 | chr11:61918339-61924761   | chr11:61900592-61900896   |
| AW665466 | 34720 | pooled          |   |                                                 | chr11:61918339-61924761   | chr11:61901012-61901603   |
| BE178095 | 43997 | head_neck       |   |                                                 | chr19:20334642-20343232   | chr19:20342836-20343355   |
| BE774029 | 43997 | prostate_tumor  |   |                                                 | chr19:20334642-20343232   | chr19:20343060-20343469   |
| BQ932595 | 43997 |                 | 0 | sciatic_nerve                                   | chr19:20334642-20343232   | chr19:20341415-20342266   |
| BQ941761 | 43997 |                 | 0 | sciatic_nerve                                   | chr19:20334642-20343232   | chr19:20341254-20342117   |
| CN288807 | 43997 |                 | 0 | embryonic_stem_cells,_DMSO-treated_H9_cell_line | chr19:20334642-20343232   | chr19:20341894-20342616   |
| CB989495 | 44200 | placenta        |   | Human_Placenta                                  | chr19:58202512-58209273   | chr19:58202584-58204665   |
| CF593888 | 44200 | placenta        |   | Human_Placenta                                  | chr19:58202512-58209273   | chr19:58202584-58204982   |
| CF994266 | 44200 | placenta        |   | Human_Placenta                                  | chr19:58202512-58209273   | chr19:58202584-58204696   |
| AI434519 | 44205 | lymph_node      |   | lymphoma,_follicular_mixed_small_and_large_cell | chr19:58245133-58246051   | chr19:58245755-58246192   |
| BF999026 | 44205 | placenta_normal |   |                                                 | chr19:58245133-58246051   | chr19:58244814-58244940   |
| CA417098 | 44205 |                 | 0 | Chondrosarcoma_Cell_line                        | chr19:58245133-58246051   | chr19:58245685-58246008   |
| AA218808 | 45477 | brain           |   | neuroepithelial_cells                           | chr22:17301017-17308997   | chr22:17302724-17303077   |
| AA580921 | 45477 |                 | 0 | bulk_germ_cell_seminoma                         | chr22:17301017-17308997   | chr22:17308127-17308527   |
| AA922960 | 45477 |                 | 0 | pooled_germ_cell_tumors                         | chr22:17301017-17308997   | chr22:17302169-17302520   |
| AI632501 | 45477 |                 | 0 | pooled_germ_cell_tumors                         | chr22:17301017-17308997   | chr22:17301903-17302572   |
| AI635368 | 45477 |                 | 0 | pooled_germ_cell_tumors                         | chr22:17301017-17308997   | chr22:17301989-17302590   |
| AU124350 | 45477 |                 | 0 |                                                 | chr22:17301017-17308997   | chr22:17308055-17308833   |
| AW206802 | 45477 |                 | 0 |                                                 | chr22:17301017-17308997   | chr22:17304925-17305380   |
| AW812040 | 45477 | stomach         |   |                                                 | chr22:17301017-17308997   | chr22:17307469-17307998   |
| AW812041 | 45477 | stomach         |   |                                                 | chr22:17301017-17308997   | chr22:17307471-17307998   |
| BE465971 | 45477 |                 | 0 | pooled_germ_cell_tumors                         | chr22:17301017-17308997   | chr22:17302093-17302590   |
| BE466095 | 45477 |                 | 0 | pooled_germ_cell_tumors                         | chr22:17301017-17308997   | chr22:17301927-17302590   |
| BE504736 | 45477 |                 | 0 | pooled_germ_cell_tumors                         | chr22:17301017-17308997   | chr22:17302033-17302566   |
| BE550633 | 45477 |                 | 0 | pooled_germ_cell_tumors                         | chr22:17301017-17308997   | chr22:17304714-17305584   |
| BF773517 | 45477 | epid_tumor      |   |                                                 | chr22:17301017-17308997   | chr22:17306457-17306768   |



|          |       |   |                                                 |                         |                         |
|----------|-------|---|-------------------------------------------------|-------------------------|-------------------------|
| BX955734 | 45477 | 0 | 0                                               | chr22:17301017-17308997 | chr22:17301562-17302022 |
| BX956279 | 45477 | 0 | 0                                               | chr22:17301017-17308997 | chr22:17301562-17302049 |
| CF227254 | 45477 | 0 | embryonic_stem_cells,_cell_lines_H1,_H7,_and_H9 | chr22:17301017-17308997 | chr22:17307036-17307566 |
| CF227255 | 45477 | 0 | embryonic_stem_cells,_cell_lines_H1,_H7,_and_H9 | chr22:17301017-17308997 | chr22:17306572-17307218 |
| CF227256 | 45477 | 0 | embryonic_stem_cells,_DMSO-treated_H9_cell_line | chr22:17301017-17308997 | chr22:17306464-17307001 |
| CF227258 | 45477 | 0 | embryonic_stem_cells,_cell_lines_H1,_H7,_and_H9 | chr22:17301017-17308997 | chr22:17306465-17307155 |
| CF227260 | 45477 | 0 | embryonic_stem_cells,_cell_lines_H1,_H7,_and_H9 | chr22:17301017-17308997 | chr22:17306543-17307068 |
| CF227261 | 45477 | 0 | embryonic_stem_cells,_cell_lines_H1,_H7,_and_H9 | chr22:17301017-17308997 | chr22:17305726-17306267 |
| CF227265 | 45477 | 0 | embryonic_stem_cells,_cell_lines_H1,_H7,_and_H9 | chr22:17301017-17308997 | chr22:17306679-17307332 |
| CF227267 | 45477 | 0 | embryonic_stem_cells,_cell_lines_H1,_H7,_and_H9 | chr22:17301017-17308997 | chr22:17307179-17307846 |
| CF227269 | 45477 | 0 | embryonic_stem_cells,_cell_lines_H1,_H7,_and_H9 | chr22:17301017-17308997 | chr22:17307246-17307879 |
| CF227271 | 45477 | 0 | embryonic_stem_cells,_cell_lines_H1,_H7,_and_H9 | chr22:17301017-17308997 | chr22:17305577-17306261 |
| CF227272 | 45477 | 0 | embryonic_stem_cells,_cell_lines_H1,_H7,_and_H9 | chr22:17301017-17308997 | chr22:17307044-17307768 |
| CF227273 | 45477 | 0 | embryonic_stem_cells,_cell_lines_H1,_H7,_and_H9 | chr22:17301017-17308997 | chr22:17306156-17306744 |
| CF227274 | 45477 | 0 | embryonic_stem_cells,_cell_lines_H1,_H7,_and_H9 | chr22:17301017-17308997 | chr22:17305571-17306104 |
| CF227275 | 45477 | 0 | embryonic_stem_cells,_DMSO-treated_H9_cell_line | chr22:17301017-17308997 | chr22:17307091-17307391 |
| CN311414 | 45477 | 0 | embryonic_stem_cells,_cell_lines_H1,_H7,_and_H9 | chr22:17301017-17308997 | chr22:17307008-17309113 |
| CN311415 | 45477 | 0 | embryonic_stem_cells,_cell_lines_H1,_H7,_and_H9 | chr22:17301017-17308997 | chr22:17308700-17309389 |
| CN345078 | 45477 | 0 | embryonic_stem_cells,_cell_lines_H1,_H7,_and_H9 | chr22:17301017-17308997 | chr22:17301571-17302221 |

|          |       |                |                                                           |                         |                         |
|----------|-------|----------------|-----------------------------------------------------------|-------------------------|-------------------------|
| CN345081 | 45477 | 0              | embryonic_stem_cells,_cell_lines_H1,_H7,_and_H9           | chr22:17301017-17308997 | chr22:17301562-17302218 |
| CN345082 | 45477 | 0              | embryonic_stem_cells,_cell_lines_H1,_H7,_and_H9           | chr22:17301017-17308997 | chr22:17301533-17302154 |
| CN418483 | 45477 | 0              | embryonic_stem_cells,_cell_lines_H1,_H7,_and_H9           | chr22:17301017-17308997 | chr22:17303765-17304400 |
| CN418484 | 45477 | 0              | embryonic_stem_cells,_cell_lines_H1,_H7,_and_H9           | chr22:17301017-17308997 | chr22:17303077-17303932 |
| AA196978 | 45501 | 0              |                                                           | chr22:22205467-22213364 | chr22:22205544-22205939 |
| AI623315 | 45501 | 0              | pooled_germ_cell_tumors                                   | chr22:22205467-22213364 | chr22:22205737-22206181 |
| AI917742 | 45501 | 0              | pooled_germ_cell_tumors                                   | chr22:22205467-22213364 | chr22:22205848-22206181 |
| BF858540 | 45501 | prostate_tumor | 0                                                         | chr22:22205467-22213364 | chr22:22206612-22206936 |
| BG980069 | 45501 | colon_normal   | 0                                                         | chr22:22205467-22213364 | chr22:22203867-22205937 |
| BG981831 | 45501 | colon_normal   | 0                                                         | chr22:22205467-22213364 | chr22:22203767-22205676 |
| BX956126 | 45501 | 0              | 0                                                         | chr22:22205467-22213364 | chr22:22203631-22205601 |
| CN270291 | 45501 | 0              | embryonic_stem_cells,_DMSO-treated_H9_cell_line           | chr22:22205467-22213364 | chr22:22206596-22207078 |
| CN276660 | 45501 | 0              | embryonic_stem_cells,_DMSO-treated_H9_cell_line           | chr22:22205467-22213364 | chr22:22207203-22207361 |
| CN279094 | 45501 | 0              | embryonic_stem_cells,_embryoid_bodies_derived_from_H1,_H7 | chr22:22205467-22213364 | chr22:22206775-22207390 |
| CN413597 | 45501 | 0              | embryonic_stem_cells,_cell_lines_H1,_H7,_and_H9           | chr22:22205467-22213364 | chr22:22203682-22205955 |
